# Supplementary material for: Phosphate Deficiency Negatively Affects Early Steps of the Symbiosis between Common Bean and Rhizobia
Source: Preprints.org preprint supplement (doi:10.20944/preprints201809.0207.v1), 2018-09-12
Supplement: Supplementary file 1 [file supplementary]

## Sheet: Sheet1
Table S2: Rhizobia-induced genes under Optimal phosphate conditions
Gene ID	FPKM_OP_mock	FPKM_OP_Rhizobia	Fold-Change	Log2Fold-Change	q_value	Description
Phvul.001G237500	0	1.35018	UD	UD	0.00119252	PTHR11654//PTHR11654:SF128 - OLIGOPEPTIDE TRANSPORTER-RELATED // SUBFAMILY NOT NAMED
Phvul.002G068500	0	0.958608	UD	UD	0.00119252	PTHR13620:SF7 - EMB
Phvul.002G230600	0	2.32484	UD	UD	0.00119252	NA_SP
Phvul.002G319108	0	9.69768	UD	UD	0.00119252	PTHR15907:SF47 - PROTEIN PLANT CADMIUM RESISTANCE 11-RELATED
Phvul.003G155600	0	1.65252	UD	UD	0.00119252	PTHR33021:SF8 - EARLY NODULIN-LIKE PROTEIN 1-RELATED
Phvul.003G249500	0	0.805555	UD	UD	0.00119252	NA_SP
Phvul.005G032300	0	0.95024	UD	UD	0.00119252	2.1.1.154 - Isoliquiritigenin 2'-O-methyltransferase / CHMT
Phvul.005G045800	0	2.49414	UD	UD	0.00119252	PTHR13683:SF298 - ASPARTIC PROTEINASE CDR1-RELATED
Phvul.005G050500	0	0.87267	UD	UD	0.00119252	PTHR13683:SF298 - ASPARTIC PROTEINASE CDR1-RELATED
Phvul.005G052000	0	0.906525	UD	UD	0.00119252	NA_SP
Phvul.005G165300	0	1.08996	UD	UD	0.011265	K05759 - profilin (PFN)
Phvul.006G036144	0	5.44771	UD	UD	0.00119252	K15077 - elongin-A (ELA1)
Phvul.006G074700	0	1.55389	UD	UD	0.00119252	PF07107 - Wound-induced protein WI12 (WI12)
Phvul.006G126200	0	15.1715	UD	UD	0.00119252	PF07883 - Cupin domain (Cupin_2)
Phvul.007G010500	0	0.983089	UD	UD	0.00119252	PF05056 - Protein of unknown function (DUF674) (DUF674)
Phvul.008G116801	0	1.55597	UD	UD	0.00119252	K08081 - Tropinone reductase 1 (TR1)
Phvul.009G068600	0	1.12922	UD	UD	0.00307701	NA_SP
Phvul.009G180700	0	2.84413	UD	UD	0.00119252	2.7.11.1 - Non-specific serine/threonine protein kinase / Threonine-specific protein kinase
Phvul.009G203600	0	2.5263	UD	UD	0.00474738	PF00280 - Potato inhibitor I family (potato_inhibit)
Phvul.011G096800	0	0.871635	UD	UD	0.00119252	1.1.1.198 - (+)-borneol dehydrogenase
Phvul.011G197200	0	3.55148	UD	UD	0.00119252	NA_SP
Phvul.008G218500	0.313897	28.421	90.5424	6.50052	0.00119252	PTHR31388:SF24 - PEROXIDASE 52
Phvul.005G157800	0.104838	6.06425	57.844	5.8541	0.00216493	PTHR31250:SF13 - CALMODULIN-BINDING PROTEIN
Phvul.004G106300	0.353771	18.4532	52.1614	5.70491	0.00119252	PTHR12064//PTHR12064:SF36 - ANCIENT CONSERVED DOMAIN PROTEIN-RELATED // SUBFAMILY NOT NAMED
Phvul.005G045300	0.144846	6.73839	46.5211	5.53981	0.00395223	3.2.1.52 - Beta-N-acetylhexosaminidase / N-acetyl-beta-glucosaminidase
Phvul.002G329800	0.423014	19.4694	46.0254	5.52436	0.00119252	PTHR11588:SF97 - TUBULIN BETA-4 CHAIN-RELATED
Phvul.005G117300	0.42441	10.4935	24.7249	4.62789	0.00119252	PTHR33264:SF5 - EXPRESSED PROTEIN-RELATED
Phvul.003G214100	1.80937	42.7931	23.6508	4.56382	0.00119252	PTHR10795//PTHR10795:SF369 - PROPROTEIN CONVERTASE SUBTILISIN/KEXIN // SUBFAMILY NOT NAMED
Phvul.011G060400	0.6277	13.4254	21.3882	4.41875	0.00119252	PTHR12483//PTHR12483:SF45 - SOLUTE CARRIER FAMILY 31 COPPER TRANSPORTERS // SUBFAMILY NOT NAMED
Phvul.005G111800	0.293008	6.15231	20.9971	4.39212	0.00119252	PF03514 - GRAS domain family (GRAS)
Phvul.002G064232	74.2498	1408.93	18.9755	4.24607	0.00119252	NA_SP
Phvul.002G304400	0.823686	15.2094	18.465	4.20672	0.00119252	PTHR12374//PTHR12374:SF19 - TRANSCRIPTIONAL ADAPTOR 2 ADA2 -RELATED // SUBFAMILY NOT NAMED
Phvul.001G130900	0.272075	4.90428	18.0255	4.17197	0.00119252	PTHR19241//PTHR19241:SF247 - ATP-BINDING CASSETTE TRANSPORTER // SUBFAMILY NOT NAMED
Phvul.009G094600	0.198841	3.4908	17.5557	4.13387	0.00216493	PF03140 - Plant protein of unknown function (DUF247)
Phvul.003G158800	0.503876	8.75145	17.3683	4.11838	0.00119252	PTHR11177//PTHR11177:SF208 - CHITINASE // SUBFAMILY NOT NAMED
Phvul.008G090500	0.0604467	1.03773	17.1677	4.10163	0.0327282	2.4.1.272 - Soyasapogenol B glucuronide galactosyltransferase
Phvul.004G124100	0.671831	9.80729	14.5979	3.86768	0.00119252	2.7.10.2 - Non-specific protein-tyrosine kinase / Cytoplasmic protein tyrosine kinase
Phvul.011G083500	2.99215	43.048	14.387	3.84669	0.00119252	K02575 - MFS transporter, NNP family, nitrate/nitrite transporter (NRT, narK, nrtP, nasA)
Phvul.011G092600	0.0570075	0.788615	13.8335	3.7901	0.0262532	PTHR10795//PTHR10795:SF427 - PROPROTEIN CONVERTASE SUBTILISIN/KEXIN // SUBFAMILY NOT NAMED
Phvul.010G126200	0.127688	1.68856	13.2241	3.7251	0.00119252	PF09818 - Predicted ATPase of the ABC class (ABC_ATPase)
Phvul.003G149200	4.24517	56.0472	13.2026	3.72275	0.00119252	2.7.10.2 - Non-specific protein-tyrosine kinase / Cytoplasmic protein tyrosine kinase
Phvul.005G052500	1.59304	19.7495	12.3974	3.63196	0.00119252	2.5.1.43 - Nicotianamine synthase
Phvul.002G064166	392.381	4745.67	12.0945	3.59628	0.00119252	NA_SP
Phvul.001G226900	3.23886	37.0004	11.4239	3.51399	0.00119252	PF13947 - Wall-associated receptor kinase galacturonan-binding (GUB_WAK_bind)
Phvul.002G205100	0.351693	3.96685	11.2793	3.4956	0.00552327	PTHR31851:SF6 - VACUOLAR IRON TRANSPORTER HOMOLOG 2.1
Phvul.006G030200	0.238758	2.49239	10.439	3.38391	0.0482853	PF14009 - Domain of unknown function (DUF4228) (DUF4228)
Phvul.008G239400	0.548874	5.38096	9.80363	3.29332	0.0138572	NA_SP
Phvul.005G173500	0.36157	3.49331	9.6615	3.27225	0.00119252	PTHR10209:SF95 - GIBBERELLIN 3-BETA-DIOXYGENASE 1-RELATED
Phvul.011G122800	1.05352	9.68838	9.1962	3.20104	0.00119252	K08472 - mlo protein (MLO)
Phvul.003G234100	0.895268	8.20669	9.16674	3.19641	0.00119252	PF14009 - Domain of unknown function (DUF4228) (DUF4228)
Phvul.005G163600	0.383072	3.39038	8.8505	3.14576	0.00119252	PTHR27003:SF105 - LEUCINE-RICH REPEAT PROTEIN KINASE-RELATED
Phvul.009G030800	7.21732	58.6398	8.12487	3.02235	0.00119252	PTHR23500:SF44 - SUGAR TRANSPORT PROTEIN 5
Phvul.008G009500	4.5742	36.7461	8.03334	3.006	0.00119252	NA_SP
Phvul.008G244400	1.92367	15.209	7.90624	2.98299	0.00119252	PTHR27003:SF36 - LEUCINE-RICH REPEAT PROTEIN KINASE-LIKE PROTEIN
Phvul.011G046400	10.2874	79.6231	7.73987	2.95232	0.00119252	PF10950 - Protein of unknown function (DUF2775) (DUF2775)
Phvul.005G183400	0.66628	5.07633	7.61891	2.92958	0.011265	NA_SP
Phvul.001G261500	5.2852	39.7846	7.52755	2.91218	0.00119252	1.14.13.21 - Flavonoid 3'-monooxygenase / Flavonoid 3'-hydroxylase
Phvul.009G182900	0.104491	0.786552	7.52746	2.91216	0.0210327	PTHR23213:SF239 - FORMIN-LIKE PROTEIN 4-RELATED
Phvul.003G058000	0.313086	2.18652	6.98377	2.80401	0.00474738	PTHR31828:SF1 - PHOSPHOLIPASE A1-IIALPHA-RELATED
Phvul.007G101600	0.162371	1.10457	6.80275	2.76612	0.00994464	PTHR27000:SF18 - LEUCINE-RICH REPEAT-CONTAINING PROTEIN
Phvul.002G171100	0.837315	5.62529	6.71825	2.74808	0.00119252	PTHR10759//PTHR10759:SF9 - 60S RIBOSOMAL PROTEIN L34 // SUBFAMILY NOT NAMED
Phvul.001G039100	4.07107	27.1521	6.66952	2.73758	0.00119252	K18787 - thermospermine synthase (ACL5)
Phvul.006G075800	56.1382	371.893	6.6246	2.72783	0.00119252	1.11.1.7 - Peroxidase / Lactoperoxidase
Phvul.011G139800	0.425585	2.78653	6.54753	2.71095	0.00119252	K05658 - ATP-binding cassette, subfamily B (MDR/TAP), member 1 (ABCB1)
Phvul.007G260700	1.13062	7.35066	6.50144	2.70076	0.00119252	PTHR31388:SF8 - PEROXIDASE 53-RELATED
Phvul.011G179500	0.913941	5.68396	6.21918	2.63672	0.00119252	PF01753//PF13920 - MYND finger (zf-MYND) // Zinc finger, C3HC4 type (RING finger) (zf-C3HC4_3)
Phvul.001G185100	0.202421	1.24206	6.13602	2.6173	0.00994464	PTHR21654:SF0 - LD26007P
Phvul.002G135900	2.83375	17.3067	6.10735	2.61055	0.00119252	PTHR21493//PTHR21493:SF2 - CGI-141-RELATED/LIPASE CONTAINING PROTEIN // SUBFAMILY NOT NAMED
Phvul.002G100001	1.17935	7.17055	6.08009	2.60409	0.00119252	PTHR11040:SF48 - ZINC TRANSPORTER 10-RELATED
Phvul.008G042700	2.1121	12.8379	6.07826	2.60366	0.00119252	1.1.2.6 - Polyvinyl alcohol dehydrogenase (cytochrome) / PVADH
Phvul.006G109000	25.5683	155.244	6.07174	2.60211	0.00119252	PTHR11177//PTHR11177:SF170 - CHITINASE // SUBFAMILY NOT NAMED
Phvul.008G086900	1.59642	9.5418	5.977	2.57942	0.00119252	1.11.1.7 - Peroxidase / Lactoperoxidase
Phvul.004G143900	0.44536	2.64065	5.92925	2.56785	0.00119252	PTHR10217:SF475 - CYCLIC NUCLEOTIDE-GATED ION CHANNEL 19-RELATED
Phvul.001G180300	0.168548	0.995455	5.90606	2.5622	0.0361525	2.3.1.78 - Heparan-alpha-glucosaminide N-acetyltransferase
Phvul.002G099700	11.8458	69.7544	5.88853	2.5579	0.00119252	PTHR11040:SF48 - ZINC TRANSPORTER 10-RELATED
Phvul.011G101500	0.377578	2.18956	5.79896	2.53579	0.00119252	PTHR13301:SF53 - CELLULOSE SYNTHASE-LIKE PROTEIN B1-RELATED
Phvul.001G092100	3.76578	21.7963	5.78799	2.53306	0.00119252	PF11820 - Protein of unknown function (DUF3339) (DUF3339)
Phvul.001G066550	0.343057	1.97029	5.74333	2.52189	0.0106059	2.7.11.1 - Non-specific serine/threonine protein kinase / Threonine-specific protein kinase
Phvul.008G222100	2.11847	11.6995	5.52262	2.46535	0.00119252	PTHR23315//PTHR23315:SF132 - BETA CATENIN-RELATED ARMADILLO REPEAT-CONTAINING // SUBFAMILY NOT NAMED
Phvul.004G028900	0.297068	1.6325	5.49537	2.45821	0.00119252	PF05729//PF13676 - NACHT domain (NACHT) // TIR domain (TIR_2)
Phvul.008G220300	0.995437	5.37429	5.39893	2.43267	0.00119252	PTHR11709:SF22 - LACCASE-12-RELATED
Phvul.011G032800	1.34283	7.17742	5.345	2.41819	0.00119252	PTHR10209//PTHR10209:SF177 - OXIDOREDUCTASE, 2OG-FE II OXYGENASE FAMILY PROTEIN // SUBFAMILY NOT NAMED
Phvul.009G245000	6.86615	36.655	5.33851	2.41644	0.00119252	NA_SP
Phvul.009G109100	1.33512	7.1262	5.3375	2.41617	0.00119252	K11159 - carotenoid cleavage dioxygenase (K11159)
Phvul.L002343	0.557928	2.96753	5.31884	2.41111	0.00216493	PTHR33431:SF2 - GB
Phvul.010G034400	1.12664	5.9497	5.28092	2.40079	0.00119252	K08472 - mlo protein (MLO)
Phvul.005G132200	34.9014	182.154	5.2191	2.3838	0.00119252	K02575 - MFS transporter, NNP family, nitrate/nitrite transporter (NRT, narK, nrtP, nasA)
Phvul.008G032600	1.45107	7.47984	5.15471	2.36589	0.00119252	2.1.1.231 - Flavonoid 4'-O-methyltransferase / Isoflavone O-methyltransferase
Phvul.003G142300	0.983576	4.95739	5.04017	2.33347	0.0266921	PF14009 - Domain of unknown function (DUF4228) (DUF4228)
Phvul.006G148500	1.77109	8.80086	4.96918	2.313	0.00119252	PF14476 - Petal formation-expressed (Chloroplast_duf)
Phvul.002G126200	2.55357	12.6538	4.95534	2.30899	0.00119252	PTHR24298:SF129 - CYTOCHROME P450
Phvul.006G111111	4.7514	23.5162	4.94932	2.30723	0.00216493	NA_SP
Phvul.006G083600	3.44831	16.8479	4.88584	2.28861	0.00119252	PTHR31852:SF1 - LATE EMBRYOGENESIS ABUNDANT (LEA) HYDROXYPROLINE-RICH GLYCOPROTEIN-RELATED
Phvul.007G060800	6.25521	30.5229	4.8796	2.28676	0.00119252	KOG4579 - Leucine-rich repeat (LRR) protein associated with apoptosis in muscle tissue
Phvul.002G059500	0.297744	1.44854	4.86505	2.28245	0.00216493	K04733 - interleukin-1 receptor-associated kinase 4 (IRAK4)
Phvul.008G291800	1.66672	8.09119	4.85456	2.27934	0.00119252	PTHR32002:SF3 - PROTEIN NLP1-RELATED
Phvul.002G075600	21.9058	106.138	4.8452	2.27657	0.00119252	NA_SP
Phvul.005G107400	0.6352	3.06681	4.8281	2.27145	0.00119252	PF04484 - Family of unknown function (DUF566) (DUF566)
Phvul.005G093000	1.79186	8.61017	4.80516	2.26459	0.00119252	NA_SP
Phvul.006G069500	0.907811	4.3073	4.74471	2.24632	0.00119252	PTHR13832:SF117 - PROTEIN PHOSPHATASE 2C-LIKE PROTEIN-RELATED
Phvul.008G044800	0.42561	2.00697	4.71551	2.23741	0.00119252	PTHR23070:SF5 - AAA-TYPE ATPASE FAMILY PROTEIN-RELATED
Phvul.003G204032	1.0297	4.85266	4.71269	2.23655	0.00119252	PTHR10638//PTHR10638:SF34 - COPPER AMINE OXIDASE // SUBFAMILY NOT NAMED
Phvul.001G246300	2.63608	12.3857	4.69853	2.23221	0.00119252	PTHR31213:SF9 - ABSCISIC ACID RECEPTOR PYL5
Phvul.010G083300	4.42744	20.6781	4.67044	2.22356	0.00119252	NA_SP
Phvul.008G032700	0.484042	2.23884	4.6253	2.20954	0.0161866	K13262 - isoflavone-7-O-methyltransferase (7-IOMT)
Phvul.009G130600	3.17491	14.5847	4.59374	2.19967	0.00119252	EF-HAND CALCIUM-BINDING DOMAIN CONTAINING PROTEIN // SUBFAMILY NOT NAMED
Phvul.006G068900	29.4964	131.346	4.45295	2.15476	0.00119252	NA_SP
Phvul.009G189700	3.43262	15.2259	4.43565	2.14915	0.00119252	PTHR31429:SF1 - WRKY FAMILY TRANSCRIPTION FACTOR-RELATED
Phvul.002G181200	8.59623	37.992	4.41961	2.14392	0.00119252	PTHR11200:SF63 - DNASE I-LIKE SUPERFAMILY PROTEIN
Phvul.010G066800	2.97588	13.1206	4.40898	2.14045	0.00119252	Peroxidase / Lactoperoxidase
Phvul.009G030700	2.9962	13.1853	4.40067	2.13772	0.00119252	PTHR23500:SF44 - SUGAR TRANSPORT PROTEIN 5
Phvul.008G049500	11.8553	51.9013	4.3779	2.13024	0.00119252	NA_SP
Phvul.004G115800	4.54562	19.7079	4.33558	2.11623	0.00119252	PTHR33044:SF21 - PROTEIN YLS3
Phvul.011G179600	3.45045	14.7011	4.26063	2.09107	0.00119252	PTHR14879 - CASPASE REGULATOR, RING FINGER DOMAIN-CONTAINING
Phvul.010G067900	13.4284	57.1093	4.25287	2.08844	0.00119252	PTHR13902//PTHR13902:SF68 - SERINE/THREONINE-PROTEIN KINASE WNK WITH NO LYSINE -RELATED
Phvul.003G057900	11.2993	47.9822	4.24648	2.08627	0.00119252	NA_SP
Phvul.009G257600	0.343716	1.4574	4.24013	2.0841	0.00395223	D-arabinono-1,4-lactone oxidase / D-arabinono-gamma-lactone oxidase
Phvul.010G002500	12.0464	50.9896	4.23277	2.0816	0.00119252	NA_SP
Phvul.005G042100	1.51817	6.40169	4.21671	2.07612	0.00633847	PF05678 - VQ motif (VQ)
Phvul.003G003100	4.62482	19.3495	4.18384	2.06483	0.00119252	Peroxidase / Lactoperoxidase
Phvul.001G201300	36.394	151.111	4.15209	2.05383	0.00119252	Peroxidase / Lactoperoxidase
Phvul.003G205900	86.6633	359.703	4.15058	2.05331	0.00119252	PTHR34806:SF1 - HIGH-AFFINITY NITRATE TRANSPORTER 3.1-RELATED
Phvul.008G184800	5.85324	24.1331	4.12303	2.04371	0.00119252	PTHR31945:SF6 - TRANSCRIPTION FACTOR BHLH61-RELATED
Phvul.008G088700	2.03208	8.36113	4.11457	2.04074	0.00854285	PTHR31087:SF11 - PROTEIN LURP-ONE-RELATED 1-RELATED
Phvul.001G113900	1.42374	5.8398	4.10173	2.03623	0.00119252	PTHR24198:SF85 - IKB-1
Phvul.008G049400	20.5484	83.9187	4.08395	2.02997	0.00119252	NA_SP
Phvul.001G235000	1.02536	4.08523	3.98419	1.99429	0.00119252	PF13912 - C2H2-type zinc finger (zf-C2H2_6)
Phvul.001G209100	0.825333	3.28201	3.97659	1.99153	0.00119252	PTHR31707:SF38 - PECTINESTERASE/PECTINESTERASE INHIBITOR 20-RELATED
Phvul.009G076300	57.2806	226.224	3.9494	1.98163	0.00119252	PTHR13832:SF315 - PROTEIN PHOSPHATASE 2C 61-RELATED
Phvul.003G057801	31.062	122.636	3.9481	1.98116	0.00119252	NA_SP
Phvul.007G092400	0.98667	3.85898	3.91112	1.96758	0.0233768	NA_SP
Phvul.008G116500	2.4442	9.5113	3.89138	1.96028	0.00119252	K08081 - Tropinone reductase 1 (TR1)
Phvul.008G171400	0.537771	2.08953	3.88554	1.95812	0.00119252	PTHR10551//PTHR10551:SF12 - FASCIN // SUBFAMILY NOT NAMED
Phvul.007G254600	0.97354	3.70327	3.80392	1.92749	0.00925439	NA_SP
Phvul.006G133400	4.50924	17.132	3.79931	1.92574	0.00119252	PTHR27003:SF15 - LEUCINE-RICH REPEAT PROTEIN KINASE-LIKE PROTEIN
Phvul.009G119200	3.24207	12.3003	3.79396	1.92371	0.00119252	PTHR10044//PTHR10044:SF112 - INHIBITOR OF APOPTOSIS // SUBFAMILY NOT NAMED
Phvul.010G027601	0.876937	3.3047	3.76846	1.91398	0.0428859	NA_SP
Phvul.003G054700	3.27358	12.2958	3.75607	1.90922	0.00119252	PF14009 - Domain of unknown function (DUF4228) (DUF4228)
Phvul.002G070600	0.354033	1.32857	3.75267	1.90791	0.0332735	NA_SP
Phvul.001G033800	17.1428	64.2572	3.74835	1.90625	0.00119252	PTHR13832:SF315 - PROTEIN PHOSPHATASE 2C 61-RELATED
Phvul.007G064500	10.5226	39.3878	3.74316	1.90426	0.00119252	Non-specific protein-tyrosine kinase / Cytoplasmic protein tyrosine kinase
Phvul.010G002600	1.20783	4.50844	3.73268	1.90022	0.00119252	PF03140 - Plant protein of unknown function (DUF247)
Phvul.001G145400	2.03943	7.55433	3.70414	1.88914	0.00119252	NA_SP
Phvul.002G272500	8.67807	32.1225	3.70157	1.88814	0.00119252	NA_SP
Phvul.004G137300	0.42436	1.56481	3.68746	1.88263	0.00119252	PTHR11017//PTHR11017:SF171 - LEUCINE-RICH REPEAT-CONTAINING PROTEIN // SUBFAMILY NOT NAMED
Phvul.004G105800	0.323451	1.19223	3.68597	1.88204	0.0281846	PTHR32096:SF22 - WRKY TRANSCRIPTION FACTOR 27-RELATED
Phvul.002G293200	2.40352	8.77187	3.64959	1.86773	0.00119252	PF03106 - WRKY DNA -binding domain (WRKY)
Phvul.004G106500	1.38365	5.04778	3.64816	1.86718	0.00119252	PF00646 - F-box domain (F-box)
Phvul.010G022400	1.06261	3.85087	3.62397	1.85758	0.00119252	KOG0156 - Cytochrome P450 CYP2 subfamily
Phvul.009G052700	35.0945	125.777	3.58395	1.84155	0.00119252	PTHR23056:SF45 - CALCINEURIN B-LIKE PROTEIN 4
Phvul.010G014300	2.39421	8.57005	3.57949	1.83975	0.00119252	PTHR31623:SF15 - ACETYL-COA:BENZYLALCOHOL ACETYLTRANFERASE-LIKE PROTEIN-RELATED
Phvul.011G098800	0.225208	0.804182	3.57084	1.83627	0.0428859	PTHR31086:SF22 - ALUMINUM-ACTIVATED MALATE TRANSPORTER 1-RELATED
Phvul.002G032400	7.7462	27.6352	3.56758	1.83495	0.00119252	NA_SP
Phvul.008G056900	0.752528	2.68395	3.56658	1.83454	0.00119252	LysM domain (LysM) // Protein tyrosine kinase (Pkinase_Tyr)
Phvul.008G247700	3.19163	11.3811	3.56592	1.83428	0.00119252	NA_SP
Phvul.008G178100	2.69745	9.60805	3.5619	1.83265	0.00119252	PTHR10209//PTHR10209:SF167 - OXIDOREDUCTASE, 2OG-FE II OXYGENASE FAMILY PROTEIN // SUBFAMILY NOT NAMED
Phvul.002G196200	0.383079	1.36129	3.55355	1.82926	0.00119252	LRR receptor-like serine/threonine-protein kinase FLS2 (FLS2)
Phvul.008G127374	0.909231	3.22122	3.5428	1.82489	0.00119252	PTHR27002:SF84 - ATP BINDING / PROTEIN KINASE-RELATED
Phvul.L001653	1.8509	6.5281	3.52699	1.81843	0.00119252	PF03140 - Plant protein of unknown function (DUF247)
Phvul.011G022300	104.024	366.018	3.51859	1.815	0.00119252	Cinnamyl-alcohol dehydrogenase / CAD
Phvul.011G074900	1.3347	4.69373	3.51669	1.81422	0.00119252	PF02140//PF02449 - Galactose binding lectin domain (Gal_Lectin) // Beta-galactosidase (Glyco_hydro_42)
Phvul.006G112600	3.49509	12.1806	3.48506	1.80118	0.00119252	PF13639//PF13947//PF14380 - Ring finger domain (zf-RING_2) // Wall-associated receptor kinase galacturonan-binding
Phvul.006G165000	3.9145	13.632	3.48244	1.8001	0.00119252	PTHR10209:SF171 - GIBBERELLIN 2-BETA-DIOXYGENASE 2-RELATED
Phvul.001G055000	0.603857	2.09931	3.4765	1.79764	0.0126296	K04124 - gibberellin 3-beta-dioxygenase (E1.14.11.15)
Phvul.003G278100	8.17583	28.4149	3.47548	1.79721	0.00119252	NA_SP
Phvul.008G078500	5.30368	18.4213	3.47331	1.79631	0.00119252	PTHR10891:SF589 - CALCIUM-BINDING PROTEIN CML42-RELATED
Phvul.004G106600	0.308988	1.07193	3.46916	1.79459	0.0437003	PTHR12064//PTHR12064:SF36 - ANCIENT CONSERVED DOMAIN PROTEIN-RELATED // SUBFAMILY NOT NAMED
Phvul.008G088400	17.2779	59.7779	3.45979	1.79068	0.00119252	PTHR31087:SF11 - PROTEIN LURP-ONE-RELATED 1-RELATED
Phvul.006G147600	11.1335	38.1634	3.4278	1.77728	0.00119252	PTHR31683:SF18 - PECTATE LYASE 2-RELATED
Phvul.008G126800	1.25012	4.27263	3.41778	1.77306	0.00119252	PTHR27002:SF84 - ATP BINDING / PROTEIN KINASE-RELATED
Phvul.010G067746	1.8668	6.35543	3.40445	1.76742	0.00119252	PTHR13832:SF283 - PROTEIN PHOSPHATASE 2C-LIKE PROTEIN 44-RELATED
Phvul.009G127900	9.08281	30.7765	3.38843	1.76062	0.00119252	PTHR11706//PTHR11706:SF38 - MANGANESE TRANSPORTER // SUBFAMILY NOT NAMED
Phvul.003G255300	4.68513	15.7271	3.35681	1.74709	0.00119252	NA_SP
Phvul.004G135200	1.17023	3.9223	3.35173	1.74491	0.00119252	PTHR11941//PTHR11941:SF70 - ENOYL-COA HYDRATASE-RELATED // SUBFAMILY NOT NAMED
Phvul.002G264300	4.87088	16.3059	3.34763	1.74314	0.00119252	PTHR11064//PTHR11064:SF45 - CCAAT-BINDING TRANSCRIPTION FACTOR-RELATED // SUBFAMILY NOT NAMED
Phvul.003G227500	1.33681	4.47055	3.34419	1.74166	0.00552327	PTHR31707:SF47 - PLANT INVERTASE/PECTIN METHYLESTERASE INHIBITOR DOMAIN-CONTAINING PROTEIN
Phvul.004G138600	1.66839	5.57062	3.33892	1.73938	0.00474738	PF02893 - GRAM domain (GRAM)
Phvul.001G022400	2.15867	7.18048	3.32634	1.73394	0.00119252	PF01094 - Receptor family ligand binding region (ANF_receptor)
Phvul.007G260800	9.7817	32.523	3.32488	1.7333	0.00119252	PTHR31388:SF8 - PEROXIDASE 53-RELATED
Phvul.008G073700	1.26287	4.19798	3.32416	1.73299	0.00119252	PTHR10795:SF320 - SUBTILASE FAMILY PROTEIN-RELATED
Phvul.004G098000	0.935993	3.10951	3.32215	1.73212	0.00704558	PF04554 - Extensin-like region (Extensin_2)
Phvul.002G184400	0.952993	3.16595	3.32211	1.7321	0.00395223	PTHR10209:SF168 - 2-OXOGLUTARATE (2OG) AND FE(II)-DEPENDENT OXYGENASE SUPERFAMILY PROTEIN-RELATED
Phvul.002G156700	1.84861	6.12795	3.3149	1.72896	0.00216493	PTHR11913:SF30 - ACTIN-DEPOLYMERIZING FACTOR 10-RELATED
Phvul.007G185701	1.95471	6.45998	3.30483	1.72458	0.0262532	tRNA(adenine(34)) deaminase
Phvul.006G140200	3.97347	13.1202	3.30195	1.72332	0.00119252	NA_SP
Phvul.006G079700	1.05971	3.47909	3.28306	1.71504	0.00216493	Trans-cinnamate 4-monooxygenase / Cinnamic acid 4-monooxygenase
Phvul.011G058900	90.4571	296.742	3.28047	1.7139	0.00119252	NA_SP
Phvul.008G086800	6.50774	21.2817	3.27021	1.70939	0.00119252	Peroxidase / Lactoperoxidase
Phvul.002G279900	7.14614	23.3348	3.26537	1.70725	0.00119252	EXPRESSED PROTEIN
Phvul.002G317600	2.88834	9.41879	3.26097	1.7053	0.00119252	NA_SP
Phvul.008G044900	1.71181	5.57212	3.2551	1.7027	0.00119252	PTHR23070:SF44 - AAA-TYPE ATPASE FAMILY PROTEIN-RELATED
Phvul.003G160800	3.20077	10.3678	3.23916	1.69561	0.00119252	Cyclic nucleotide-binding domain (cNMP_binding) // Ion channel
Phvul.009G229600	4.68288	15.1571	3.2367	1.69453	0.00119252	PTHR10052//PTHR10052:SF11 - 60S RIBOSOMAL PROTEIN L18A // SUBFAMILY NOT NAMED
Phvul.011G110900	0.492055	1.58872	3.22874	1.69097	0.0395187	PF12609 - Wound-induced protein (DUF3774)
Phvul.011G020400	48.9966	158.025	3.22522	1.6894	0.00119252	PTHR12231//PTHR12231:SF108 - CTX-RELATED TYPE I TRANSMEMBRANE PROTEIN // SUBFAMILY NOT NAMED
Phvul.005G040100	1.65342	5.32674	3.22165	1.6878	0.0198964	PTHR12313:SF0 - RING FINGER PROTEIN 5
Phvul.002G144600	1.13918	3.65429	3.20782	1.6816	0.00216493	PTHR11695:SF497 - CINNAMYL ALCOHOL DEHYDROGENASE 6-RELATED
Phvul.005G068200	0.424316	1.35712	3.19837	1.67733	0.0292838	Calmodulin and related proteins (EF-Hand superfamily) // Ca2+-binding protein (centrin/caltractin)
Phvul.004G090800	0.725293	2.31165	3.18719	1.67229	0.0132304	Peroxidase / Lactoperoxidase
Phvul.004G124700	1.04448	3.32219	3.18071	1.66935	0.00119252	Abieta-7,13-dien-18-ol hydroxylase / CYP720B1
Phvul.003G194600	1.48863	4.73346	3.17974	1.66891	0.00119252	Quinoprotein glucose dehydrogenase (PQQ, quinone) / Quinoprotein D-glucose dehydrogenase
Phvul.008G001500	57.9209	183.424	3.1668	1.66303	0.00119252	K14488 - SAUR family protein (SAUR)
Phvul.008G250700	13.4538	42.4741	3.15703	1.65857	0.00119252	PTHR11746//PTHR11746:SF83 - O-METHYLTRANSFERASE // SUBFAMILY NOT NAMED
Phvul.008G101300	3.58747	11.3172	3.15465	1.65748	0.00119252	PTHR13832:SF228 - PROTEIN PHOSPHATASE 2C 36-RELATED
Phvul.008G033200	2.89042	9.07833	3.14083	1.65115	0.00119252	K01180 - endo-1,3(4)-beta-glucanase (E3.2.1.6)
Phvul.007G076700	8.21585	25.7307	3.13184	1.64701	0.00119252	PTHR31269:SF2 - S-TYPE ANION CHANNEL SLAH2-RELATED
Phvul.009G062200	7.79674	24.3509	3.12322	1.64303	0.00119252	PTHR11654//PTHR11654:SF113 - OLIGOPEPTIDE TRANSPORTER-RELATED // SUBFAMILY NOT NAMED
Phvul.003G065600	1.17654	3.66813	3.11773	1.64049	0.00854285	PF10536 - Plant mobile domain (PMD)
Phvul.010G158100	5.02892	15.605	3.10305	1.63369	0.00119252	PF03140 - Plant protein of unknown function (DUF247)
Phvul.004G177200	3.75094	11.5432	3.07742	1.62172	0.00119252	PF02386 - Cation transport protein (TrkH)
Phvul.003G001800	1.02091	3.13554	3.07132	1.61885	0.00119252	PTHR11200:SF63 - DNASE I-LIKE SUPERFAMILY PROTEIN
Phvul.011G057700	1.27892	3.92365	3.06794	1.61727	0.00119252	K09955 - hypothetical protein (K09955)
Phvul.002G104300	11.6292	35.5822	3.05973	1.6134	0.00119252	NA_SP
Phvul.008G035900	0.288495	0.880564	3.05227	1.60988	0.0374839	PTHR33349:SF1 - CALMODULIN-BINDING PROTEIN-LIKE PROTEIN
Phvul.009G240677	0.830563	2.52581	3.04108	1.60459	0.00119252	PF13962 - Domain of unknown function (PGG)
Phvul.L005901	8.50432	25.8389	3.03833	1.60328	0.00119252	PTHR31086:SF4 - ALUMINUM-ACTIVATED MALATE TRANSPORTER 10
Phvul.001G050300	1.35372	4.11253	3.03795	1.6031	0.0106059	PTHR31731:SF19 - BIFUNCTIONAL INHIBITOR/LIPID-TRANSFER PROTEIN/SEED STORAGE 2S ALBUMIN SUPERFAMILY PROTEIN
Phvul.008G250600	2.3152	7.02605	3.03475	1.60158	0.00119252	PTHR11746//PTHR11746:SF83 - O-METHYLTRANSFERASE // SUBFAMILY NOT NAMED
Phvul.007G114000	5.6808	17.2316	3.03331	1.60089	0.00119252	Isoflavone 7-O-methyltransferase
Phvul.003G177700	4.73813	14.2845	3.0148	1.59206	0.00119252	NA_SP
Phvul.008G220600	10.2187	30.7946	3.01355	1.59146	0.00119252	PTHR31213:SF9 - ABSCISIC ACID RECEPTOR PYL5
Phvul.003G134600	16.5813	49.8673	3.00744	1.58854	0.00119252	PTHR31388:SF6 - PEROXIDASE 59
Phvul.008G247600	8.30627	24.9585	3.00478	1.58726	0.00119252	PTHR11746//PTHR11746:SF83 - O-METHYLTRANSFERASE // SUBFAMILY NOT NAMED
Phvul.002G025200	9.08559	27.2426	2.99844	1.58421	0.00119252	Premnaspirodiene oxygenase / Hyoscymus muticus premnaspirodiene oxygenase
Phvul.003G229000	16.3492	48.6376	2.97492	1.57286	0.00119252	PTHR11654:SF121 - PROTEIN NRT1/ PTR FAMILY 7.3
Phvul.001G145900	13.1527	39.1009	2.97284	1.57184	0.00119252	PTHR21495:SF71 - DIRIGENT PROTEIN 1-RELATED
Phvul.003G022000	1.02329	3.02774	2.95883	1.56503	0.00216493	PTHR22951//PTHR22951:SF25 - CLATHRIN ASSEMBLY PROTEIN // SUBFAMILY NOT NAMED
Phvul.009G097200	1.21933	3.60383	2.95558	1.56344	0.00704558	1.14.11.15 - Gibberellin 3-beta-dioxygenase / Gibberellin 3-beta-hydroxylase
Phvul.008G215700	0.870583	2.57249	2.9549	1.56311	0.0470368	NA_SP
Phvul.001G140100	5.22922	15.4194	2.9487	1.56008	0.00119252	PTHR22952//PTHR22952:SF151 - CAMP-RESPONSE ELEMENT BINDING PROTEIN-RELATED // SUBFAMILY NOT NAMED
Phvul.007G276100	71.7648	211.258	2.94376	1.55765	0.00119252	PF00045 - Hemopexin (Hemopexin)
Phvul.011G099400	1.42815	4.20099	2.94156	1.55658	0.00119252	PTHR22849//PTHR22849:SF11 - WDSAM1 PROTEIN // SUBFAMILY NOT NAMED
Phvul.004G157101	2.02711	5.95107	2.93574	1.55373	0.00552327	NA_SP
Phvul.001G243100	2.71075	7.95455	2.93445	1.55309	0.00119252	K05857 - phosphatidylinositol phospholipase C, delta (PLCD)
Phvul.004G090994	80.3742	235.287	2.92739	1.54962	0.00119252	NA_SP
Phvul.004G048800	1.14084	3.33223	2.92086	1.54639	0.00307701	PF14416 - PMR5 N terminal Domain (PMR5N)
Phvul.005G032000	3.05679	8.9152	2.91652	1.54425	0.00474738	PF00280 - Potato inhibitor I family (potato_inhibit)
Phvul.002G177000	3.56728	10.3882	2.91208	1.54204	0.00119252	Salutaridinol 7-O-acetyltransferase
Phvul.007G250000	47.7686	139.092	2.91179	1.54191	0.00119252	PTHR11260:SF254 - GLUTATHIONE S-TRANSFERASE U8
Phvul.011G086200	18.4793	53.7691	2.90969	1.54087	0.00119252	PTHR31945:SF17 - TRANSCRIPTION FACTOR FER-LIKE IRON DEFICIENCY-INDUCED TRANSCRIPTION FACTOR
Phvul.005G162100	1.56921	4.56172	2.90702	1.53954	0.00119252	PF00560//PF07714//PF12819 - Leucine Rich Repeat (LRR_1) // Protein tyrosine kinase (Pkinase_Tyr)
Phvul.003G012800	6.57086	19.0945	2.90594	1.539	0.00119252	PTHR33095:SF7 - AR781
Phvul.001G046400	7.71752	22.3989	2.90234	1.53722	0.00119252	PTHR11177//PTHR11177:SF208 - CHITINASE // SUBFAMILY NOT NAMED
Phvul.002G159000	1.32696	3.84309	2.89616	1.53414	0.00119252	PTHR11850//PTHR11850:SF66 - HOMEOBOX PROTEIN TRANSCRIPTION FACTORS // SUBFAMILY NOT NAMED
Phvul.002G219600	0.665798	1.92807	2.89588	1.534	0.00119252	PTHR16223:SF21 - TRANSCRIPTION FACTOR BHLH103-RELATED
Phvul.001G259900	15.0018	43.3145	2.88729	1.52972	0.00119252	PF12056 - Protein of unknown function (DUF3537) (DUF3537)
Phvul.003G021300	4.49218	12.9406	2.88069	1.52642	0.00119252	PTHR11562//PTHR11562:SF60 - CATION EFFLUX PROTEIN/ ZINC TRANSPORTER // SUBFAMILY NOT NAMED
Phvul.008G092400	8.02375	23.0716	2.87541	1.52377	0.00119252	Phenylpyruvate tautomerase / Phenylpyruvic keto--enol isomerase
Phvul.010G143100	0.946517	2.72053	2.87425	1.52319	0.00119252	PTHR27003:SF105 - LEUCINE-RICH REPEAT PROTEIN KINASE-RELATED
Phvul.005G065300	1.14278	3.27667	2.86728	1.51969	0.00119252	PF11145 - Protein of unknown function (DUF2921) (DUF2921)
Phvul.003G070900	0.632498	1.81199	2.86482	1.51844	0.0150711	PTHR11017//PTHR11017:SF162 - LEUCINE-RICH REPEAT-CONTAINING PROTEIN // SUBFAMILY NOT NAMED
Phvul.008G144300	0.705216	2.01954	2.86372	1.51789	0.00119252	PTHR12565:SF173 - TRANSCRIPTION FACTOR UNE10
Phvul.009G198800	4.96813	14.2241	2.86307	1.51756	0.00119252	Non-specific serine/threonine protein kinase / Threonine-specific protein kinase
Phvul.011G033650	7.9737	22.812	2.86091	1.51647	0.00119252	Phosphatidylinositol diacylglycerol-lyase / Phosphatidylinositol phospholipase C
Phvul.006G100500	4.31119	12.3265	2.85919	1.51561	0.00119252	PF13178 - Protein of unknown function (DUF4005) (DUF4005)
Phvul.011G134300	7.20726	20.5773	2.85508	1.51353	0.00119252	PTHR12565//PTHR12565:SF82 - STEROL REGULATORY ELEMENT-BINDING PROTEIN // SUBFAMILY NOT NAMED
Phvul.001G072800	15.8127	45.0946	2.8518	1.51187	0.00119252	PTHR10219:SF34 - GENOMIC DNA, CHROMOSOME 3, P1 CLONE: MXL8
Phvul.006G201100	4.09736	11.6734	2.84901	1.51046	0.00119252	2.4.1.91 - Flavonol 3-O-glucosyltransferase / UDP-glucose flavonol 3-O-glucosyltransferase
Phvul.008G094900	4.03981	11.4889	2.84392	1.50788	0.00119252	PTHR11730:SF38 - AMMONIUM TRANSPORTER 2
Phvul.006G117300	4.55466	12.9488	2.84298	1.50741	0.00119252	2.5.1.43 - Nicotianamine synthase
Phvul.001G155600	4.4105	12.4713	2.82764	1.4996	0.00119252	K17911 - beta-carotene isomerase (DWARF27)
Phvul.006G196900	105.309	296.634	2.8168	1.49406	0.00119252	K13449 - pathogenesis-related protein 1 (PR1)
Phvul.009G024301	19.6905	55.3639	2.81171	1.49145	0.00119252	PF10950 - Protein of unknown function (DUF2775) (DUF2775)
Phvul.007G093600	0.627626	1.76398	2.81056	1.49086	0.00395223	PTHR31942:SF29 - MLO-LIKE PROTEIN 12-RELATED
Phvul.001G111800	15.1566	42.2128	2.78511	1.47774	0.00119252	PTHR31194:SF0 - ETHYLENE-RESPONSIVE TRANSCRIPTION FACTOR CRF3-RELATED
Phvul.005G130500	34.4075	95.4197	2.77322	1.47157	0.00119252	PTHR31945:SF17 - TRANSCRIPTION FACTOR FER-LIKE IRON DEFICIENCY-INDUCED TRANSCRIPTION FACTOR
Phvul.009G257400	16.1092	44.6623	2.77247	1.47117	0.00119252	D-arabinono-1,4-lactone oxidase / D-arabinono-gamma-lactone oxidase
Phvul.002G049301	0.816588	2.26316	2.77148	1.47065	0.00925439	PF01657//PF07714 - Salt stress response/antifungal (Stress-antifung) // Protein tyrosine kinase (Pkinase_Tyr)
Phvul.003G093100	2.84864	7.88707	2.76871	1.46921	0.00119252	PTHR11088//PTHR11088:SF34 - TRNA DELTA 2 -ISOPENTENYLPYROPHOSPHATE TRANSFERASE-RELATED
Phvul.009G145900	4.69876	12.9674	2.75975	1.46453	0.00119252	NA_SP
Phvul.011G095500	0.654171	1.80374	2.75729	1.46325	0.0390137	PTHR31989:SF4 - NAC DOMAIN-CONTAINING PROTEIN 61-RELATED
Phvul.001G163500	1.62461	4.47337	2.7535	1.46127	0.00119252	PTHR11654//PTHR11654:SF132 - OLIGOPEPTIDE TRANSPORTER-RELATED // SUBFAMILY NOT NAMED
Phvul.001G065300	7.03891	19.3659	2.75126	1.4601	0.00119252	PTHR10209//PTHR10209:SF166 - OXIDOREDUCTASE, 2OG-FE II OXYGENASE FAMILY PROTEIN // SUBFAMILY NOT NAMED
Phvul.006G169300	17.4491	47.9197	2.74626	1.45747	0.00119252	PTHR22835//PTHR22835:SF177 - ZINC FINGER FYVE DOMAIN CONTAINING PROTEIN // SUBFAMILY NOT NAMED
Phvul.001G197000	4.49259	12.2783	2.73301	1.45049	0.00119252	PTHR14155//PTHR14155:SF90 - RING FINGER DOMAIN-CONTAINING // SUBFAMILY NOT NAMED
Phvul.004G127400	7.02508	19.1912	2.73181	1.44986	0.00119252	NA_SP
Phvul.002G019800	30.4412	83.1087	2.73014	1.44897	0.00119252	KOG0513 - Ca2+-independent phospholipase A2
Phvul.011G199800	1.45632	3.95781	2.71768	1.44237	0.0106059	PTHR11783//PTHR11783:SF89 - SULFOTRANSFERASE SULT // SUBFAMILY NOT NAMED
Phvul.004G076400	39.9651	108.222	2.70791	1.43718	0.00119252	PTHR23050:SF153 - CALMODULIN-1-RELATED
Phvul.011G068800	5.09638	13.764	2.70074	1.43335	0.00119252	PTHR12542//PTHR12542:SF17 - EXOCYST COMPLEX PROTEIN EXO70 // SUBFAMILY NOT NAMED
Phvul.001G230600	3.41076	9.17463	2.68991	1.42756	0.00119252	NA_SP
Phvul.005G079600	9.18414	24.6464	2.68358	1.42416	0.00119252	NA_SP
Phvul.009G031400	6.19192	16.6077	2.68216	1.4234	0.00119252	PTHR13832:SF314 - PROTEIN PHOSPHATASE 2C 10-RELATED
Phvul.004G096500	11.0484	29.5948	2.67865	1.42151	0.00119252	KOG4473 - Uncharacterized membrane protein
Phvul.006G086200	4.37008	11.7043	2.67828	1.42131	0.00119252	NA_SP
Phvul.009G252800	2.88214	7.69897	2.67127	1.41753	0.00119252	PF00407 - Pathogenesis-related protein Bet v I family (Bet_v_1)
Phvul.008G100400	2.61288	6.97865	2.67087	1.41731	0.00119252	PTHR11709:SF66 - LACCASE-17
Phvul.007G039200	6.3921	17.0697	2.67044	1.41707	0.00119252	PTHR11926:SF167 - UDP-GLYCOSYLTRANSFERASE 84A1-RELATED
Phvul.007G194000	22.2817	59.4624	2.66867	1.41612	0.00119252	PTHR10209//PTHR10209:SF124 - OXIDOREDUCTASE, 2OG-FE II OXYGENASE FAMILY PROTEIN // SUBFAMILY NOT NAMED
Phvul.001G032600	4.70812	12.5382	2.6631	1.41311	0.00119252	PTHR10641//PTHR10641:SF603 - MYB-LIKE DNA-BINDING PROTEIN MYB // SUBFAMILY NOT NAMED
Phvul.002G140800	4.88059	12.9394	2.6512	1.40664	0.00119252	K02698 - photosystem I subunit X (psaK)
Phvul.008G002200	0.436896	1.1526	2.63816	1.39953	0.0316291	PTHR22849//PTHR22849:SF44 - WDSAM1 PROTEIN // SUBFAMILY NOT NAMED
Phvul.002G204400	1.77888	4.6874	2.63503	1.39782	0.00119252	PF00892 - EamA-like transporter family (EamA)
Phvul.009G020600	18.8052	49.0293	2.60722	1.38251	0.00119252	PTHR23257:SF375 - RECEPTOR-INTERACTING SERINE/THREONINE-PROTEIN KINASE 1
Phvul.008G147800	116.082	302.544	2.6063	1.382	0.00119252	PTHR31238:SF42 - GERMIN-LIKE PROTEIN SUBFAMILY 1 MEMBER 10-RELATED
Phvul.011G147000	4.54026	11.7945	2.59776	1.37727	0.00119252	PF00954//PF01453//PF07714//PF08276 - S-locus glycoprotein domain (S_locus_glycop) // D-mannose binding lectin (B_lectin)
Phvul.003G053500	10.4414	27.0134	2.58714	1.37136	0.00119252	NA_SP
Phvul.002G080100	6.95678	17.9599	2.58164	1.36829	0.00119252	PTHR11260:SF193 - GLUTATHIONE S-TRANSFERASE U11-RELATED
Phvul.002G030100	3.67146	9.44872	2.57356	1.36377	0.0126296	NA_SP
Phvul.003G080700	18.343	47.1677	2.57143	1.36257	0.00119252	PF03595 - Voltage-dependent anion channel (SLAC1)
Phvul.011G200840	1.53935	3.93827	2.5584	1.35524	0.00474738	PTHR23155//PTHR23155:SF414 - LEUCINE-RICH REPEAT-CONTAINING PROTEIN // SUBFAMILY NOT NAMED
Phvul.007G092000	1.28737	3.29355	2.55836	1.35521	0.0271234	PTHR31301:SF14 - LOB DOMAIN-CONTAINING PROTEIN 1-RELATED
Phvul.002G092200	55.0574	140.786	2.55708	1.35449	0.00119252	KOG0617 - Ras suppressor protein (contains leucine-rich repeats)
Phvul.003G136500	4.46964	11.4272	2.55663	1.35424	0.00119252	PTHR13878//PTHR13878:SF14 - GULONOLACTONE OXIDASE // SUBFAMILY NOT NAMED
Phvul.002G014400	7.98583	20.4138	2.55625	1.35403	0.00119252	K14487 - auxin responsive GH3 gene family (GH3)
Phvul.003G192000	5.13987	13.1092	2.55049	1.35078	0.00119252	PF03106 - WRKY DNA -binding domain (WRKY)
Phvul.009G069500	6.24899	15.9256	2.54851	1.34965	0.00119252	Cinnamyl-alcohol dehydrogenase / CAD
Phvul.006G136600	14.5224	36.9599	2.54503	1.34768	0.00119252	PTHR31964:SF10 - ADENINE NUCLEOTIDE ALPHA HYDROLASES-LIKE SUPERFAMILY PROTEIN
Phvul.004G071700	3.61275	9.16747	2.53753	1.34342	0.00119252	PTHR31942:SF29 - MLO-LIKE PROTEIN 12-RELATED
Phvul.002G244900	29.2436	74.1691	2.53625	1.3427	0.00119252	PTHR14255//PTHR14255:SF6 - ATP-DEPENDENT PROTEASE CEREBLON // SUBFAMILY NOT NAMED
Phvul.002G100501	8.36206	21.1508	2.52938	1.33878	0.00119252	PTHR31301:SF15 - LOB DOMAIN-CONTAINING PROTEIN 4
Phvul.006G125300	0.887382	2.244	2.52879	1.33845	0.00704558	PTHR27005:SF7 - WALL-ASSOCIATED RECEPTOR KINASE-LIKE 1-RELATED
Phvul.002G209400	3.22788	8.14174	2.52232	1.33475	0.00994464	PF00407 - Pathogenesis-related protein Bet v I family (Bet_v_1)
Phvul.002G007500	0.782203	1.97157	2.52053	1.33373	0.0233768	PTHR23042:SF25 - TRANSCRIPTION FACTOR NAI1
Phvul.004G115700	0.525642	1.31793	2.50728	1.32612	0.0150711	PF00560//PF08263//PF13855 - Leucine Rich Repeat (LRR_1) // Leucine rich repeat N-terminal domain (LRRNT_2)
Phvul.006G053100	2.09407	5.25022	2.50718	1.32607	0.00119252	KOG0192//KOG0198 - Tyrosine kinase specific for activated (GTP-bound) p21cdc42Hs
Phvul.011G086600	1.23866	3.10003	2.50273	1.32351	0.00704558	PTHR10593//PTHR10593:SF41 - SERINE/THREONINE-PROTEIN KINASE RIO // SUBFAMILY NOT NAMED
Phvul.007G028200	7.10759	17.7773	2.50117	1.32261	0.00119252	PF05678 - VQ motif (VQ)
Phvul.005G089400	5.93383	14.8383	2.50063	1.32229	0.00119252	NA_SP
Phvul.009G136500	3.11858	7.7815	2.49521	1.31916	0.00119252	PTHR33143:SF6 - F16F4.1 PROTEIN-RELATED
Phvul.005G116450	1.15518	2.88226	2.49507	1.31908	0.00119252	PTHR13301:SF53 - CELLULOSE SYNTHASE-LIKE PROTEIN B1-RELATED
Phvul.009G136000	29.2582	72.9311	2.49267	1.31769	0.00119252	PTHR10219:SF34 - GENOMIC DNA, CHROMOSOME 3, P1 CLONE: MXL8
Phvul.006G144900	26.2977	65.5356	2.49207	1.31734	0.00119252	PTHR10209//PTHR10209:SF173 - OXIDOREDUCTASE, 2OG-FE II OXYGENASE FAMILY PROTEIN // SUBFAMILY NOT NAMED
Phvul.007G086600	2.95141	7.33944	2.48676	1.31426	0.00925439	PF00847 - AP2 domain (AP2)
Phvul.004G071800	1.20914	3.00002	2.48112	1.31099	0.00474738	PTHR31942:SF29 - MLO-LIKE PROTEIN 12-RELATED
Phvul.009G244200	5.05008	12.4875	2.47273	1.30611	0.00119252	Isoflavone 2'-hydroxylase / Isoflavone 2'-monooxygenase
Phvul.011G050100	0.800885	1.9782	2.47002	1.30452	0.00119252	PTHR10218:SF226 - EXTRA-LARGE GUANINE NUCLEOTIDE-BINDING PROTEIN 2
Phvul.011G199600	3.8643	9.54408	2.46981	1.3044	0.00216493	PTHR11783//PTHR11783:SF89 - SULFOTRANSFERASE SULT // SUBFAMILY NOT NAMED
Phvul.011G060300	0.6766	1.67031	2.46868	1.30374	0.0379963	PTHR11926:SF102 - GLUCOSYLTRANSFERASE-LIKE PROTEIN-RELATED
Phvul.002G075900	13.5454	33.3708	2.46363	1.30078	0.00119252	NA_SP
Phvul.001G126400	8.73735	21.5202	2.46301	1.30042	0.00119252	PTHR13935:SF41 - ACHAETE-SCUTE HOMOLOG 3
Phvul.009G031300	1.389	3.41969	2.46198	1.29982	0.00119252	K12118 - cryptochrome 1 (CRY1)
Phvul.003G109602	1.99086	4.89988	2.46119	1.29936	0.0356713	PF00407 - Pathogenesis-related protein Bet v I family (Bet_v_1)
Phvul.008G068600	1.77876	4.36679	2.45496	1.2957	0.00216493	K15095 - (+)-neomenthol dehydrogenase (E1.1.1.208)
Phvul.006G127400	41.5731	101.557	2.44285	1.28857	0.00119252	PF07712 - Stress up-regulated Nod 19 (SURNod19)
Phvul.007G096100	3.47806	8.49334	2.44198	1.28805	0.00119252	4.3.1.24 - Phenylalanine ammonia-lyase
Phvul.011G025400	2.35187	5.71372	2.42944	1.28062	0.00119252	PTHR11709:SF64 - MULTI-COPPER OXIDASE TYPE I FAMILY PROTEIN-RELATED
Phvul.009G109200	2.68301	6.50438	2.42428	1.27756	0.00119252	PTHR10543//PTHR10543:SF30 - BETA-CAROTENE DIOXYGENASE // SUBFAMILY NOT NAMED
Phvul.011G160700	6.63696	16.0744	2.42195	1.27617	0.00925439	NA_SP
Phvul.003G193000	2.76214	6.68412	2.41991	1.27495	0.00119252	PF04982 - HPP family (HPP)
Phvul.006G180200	15.9149	38.478	2.41773	1.27366	0.00119252	PF07714//PF13855 - Protein tyrosine kinase (Pkinase_Tyr) // Leucine rich repeat (LRR_8)
Phvul.005G077400	0.609215	1.47034	2.4135	1.27113	0.0316291	PF07714//PF11721 - Protein tyrosine kinase (Pkinase_Tyr) // Di-glucose binding within endoplasmic reticulum (Malectin)
Phvul.008G250300	50.8822	122.789	2.4132	1.27095	0.00119252	NA_SP
Phvul.001G209300	14.7256	35.2997	2.39717	1.26133	0.00119252	PTHR31707:SF38 - PECTINESTERASE/PECTINESTERASE INHIBITOR 20-RELATED
Phvul.010G094000	10.0116	23.9906	2.39628	1.26079	0.00119252	PF11623 - Protein of unknown function (DUF3252) (DUF3252)
Phvul.011G181366	1.79223	4.28558	2.3912	1.25774	0.00119252	PTHR11017//PTHR11017:SF162 - LEUCINE-RICH REPEAT-CONTAINING PROTEIN // SUBFAMILY NOT NAMED
Phvul.007G123958	15.1889	36.2827	2.38876	1.25627	0.00119252	PTHR22298:SF39 - ENDOGLUCANASE 7
Phvul.009G172001	18.9187	45.1588	2.38699	1.25519	0.00119252	PF00067 - Cytochrome P450 (p450)
Phvul.001G163800	0.443445	1.05758	2.38492	1.25393	0.0132304	PF00069//PF00560//PF08263//PF13855 - Protein kinase domain (Pkinase) // Leucine Rich Repeat (LRR_1)
Phvul.003G056100	2.49333	5.94418	2.38403	1.2534	0.00119252	PTHR23213:SF239 - FORMIN-LIKE PROTEIN 4-RELATED
Phvul.009G133500	24.9628	59.4206	2.38037	1.25119	0.00119252	PTHR33133:SF5 - EXPRESSED PROTEIN
Phvul.006G075400	3.64351	8.66896	2.37929	1.25053	0.0222316	NA_SP
Phvul.007G195000	9.35496	22.2206	2.37527	1.2481	0.00119252	PTHR31529:SF2 - LOB DOMAIN-CONTAINING PROTEIN 17-RELATED
Phvul.001G078900	2.23769	5.31499	2.37521	1.24806	0.00119252	PTHR23023:SF37 - INDOLE-3-PYRUVATE MONOOXYGENASE YUCCA2-RELATED
Phvul.011G215600	0.87132	2.06947	2.3751	1.24799	0.0210327	KOG0255 - Synaptic vesicle transporter SVOP and related transporters (major facilitator superfamily)
Phvul.008G152500	0.638649	1.51227	2.36792	1.24362	0.0356713	PF00560//PF07714//PF08263 - Leucine Rich Repeat (LRR_1) // Protein tyrosine kinase (Pkinase_Tyr)
Phvul.008G062600	1.286	3.04504	2.36784	1.24357	0.00474738	PTHR33101:SF9 - ROP GUANINE NUCLEOTIDE EXCHANGE FACTOR 2-RELATED
Phvul.002G092800	19.249	45.5257	2.36509	1.2419	0.00119252	PF14009 - Domain of unknown function (DUF4228) (DUF4228)
Phvul.009G190000	2.51902	5.95195	2.3628	1.2405	0.00552327	PTHR11743//PTHR11743:SF35 - VOLTAGE-DEPENDENT ANION-SELECTIVE CHANNEL // SUBFAMILY NOT NAMED
Phvul.001G243500	0.740126	1.74626	2.35941	1.23842	0.0419582	PTHR27003:SF102 - SERINE/THREONINE-PROTEIN KINASE-LIKE PROTEIN CCR3-RELATED
Phvul.003G127500	365.161	861.489	2.3592	1.2383	0.00119252	PTHR12526:SF391 - SUCROSE SYNTHASE 1-RELATED
Phvul.001G107900	7.94233	18.7221	2.35726	1.2371	0.00119252	PTHR22835:SF117 - ALPHA-L-FUCOSIDASE 3
Phvul.001G236600	18.712	44.105	2.35704	1.23698	0.00119252	PF07714//PF13947 - Protein tyrosine kinase (Pkinase_Tyr) // Wall-associated receptor kinase galacturonan-binding (GUB_WAK_bind)
Phvul.003G287101	0.540719	1.27069	2.35	1.23266	0.0316291	PF00069//PF00139 - Protein kinase domain (Pkinase) // Legume lectin domain (Lectin_legB)
Phvul.003G130400	8.70791	20.4557	2.34909	1.2321	0.00119252	Non-specific serine/threonine protein kinase / Threonine-specific protein kinase
Phvul.003G166600	1.48761	3.48948	2.3457	1.23001	0.0287268	PTHR33021:SF55 - BLUE COPPER PROTEIN
Phvul.006G196700	5.38839	12.6225	2.34254	1.22807	0.00119252	PTHR14255:SF3 - SULFITE EXPORTER TAUE/SAFE FAMILY PROTEIN
Phvul.010G129400	3.84198	8.97265	2.33542	1.22368	0.00119252	PTHR31636:SF40 - SCARECROW-LIKE PROTEIN 29
Phvul.008G001600	1.8209	4.25088	2.33449	1.22311	0.0161866	PTHR31614:SF6 - POLLEN OLE E 1 ALLERGEN AND EXTENSIN FAMILY PROTEIN
Phvul.001G110500	61.3108	142.594	2.32576	1.2177	0.00119252	Glutamate dehydrogenase / Glutamic dehydrogenase
Phvul.007G170100	3.62713	8.41594	2.32028	1.2143	0.00395223	PTHR11088:SF30 - ADENYLATE ISOPENTENYLTRANSFERASE 3, CHLOROPLASTIC
Phvul.010G120200	9.64777	22.2968	2.31108	1.20857	0.00119252	Anthranilate N-methyltransferase
Phvul.002G249800	56.4765	130.517	2.311	1.20851	0.00119252	PF00190 - Cupin (Cupin_1)
Phvul.008G059700	12.9103	29.7542	2.30469	1.20457	0.00119252	PTHR31339:SF12 - POLYGALACTURONASE-LIKE PROTEIN
Phvul.001G106300	2.12348	4.87715	2.29677	1.19961	0.0210327	NA_SP
Phvul.002G020900	47.9986	109.709	2.28567	1.19261	0.00119252	Peroxidase / Lactoperoxidase
Phvul.008G007400	8.05275	18.3909	2.2838	1.19144	0.00119252	NA_SP
Phvul.009G068100	9.0117	20.5641	2.28193	1.19026	0.00119252	PF00069//PF00954//PF01453 - Protein kinase domain (Pkinase) // S-locus glycoprotein domain (S_locus_glycop)
Phvul.005G112500	141.142	322.02	2.28153	1.19001	0.00119252	PTHR23042//PTHR23042:SF56 - CIRCADIAN PROTEIN CLOCK/ARNT/BMAL/PAS // SUBFAMILY NOT NAMED
Phvul.003G264600	3.49214	7.96013	2.27944	1.18868	0.00119252	PTHR24423:SF436 - HISTIDINE KINASE 1
Phvul.008G008700	5.93348	13.4981	2.2749	1.1858	0.0410439	NA_SP
Phvul.003G125000	23.524	53.4954	2.27408	1.18528	0.00119252	PTHR13683:SF296 - ASPARTYL PROTEASE FAMILY PROTEIN
Phvul.001G036500	1.88044	4.25984	2.26534	1.17973	0.00119252	PTHR10593:SF38 - C2H2-LIKE ZINC FINGER PROTEIN-RELATED
Phvul.006G150600	3.83436	8.68207	2.26428	1.17905	0.00216493	PTHR11527:SF97 - 15.4 KDA CLASS V HEAT SHOCK PROTEIN
Phvul.009G131100	4.19356	9.48083	2.26081	1.17684	0.0366301	NA_SP
Phvul.010G150300	6.52145	14.7315	2.25893	1.17564	0.00119252	PTHR31234:SF4 - LATE EMBRYOGENESIS ABUNDANT HYDROXYPROLINE-RICH GLYCOPROTEIN
Phvul.003G062800	1.70584	3.85244	2.25838	1.17529	0.00395223	K02575 - MFS transporter, NNP family, nitrate/nitrite transporter (NRT, narK, nrtP, nasA)
Phvul.001G169300	3.34888	7.55487	2.25594	1.17373	0.00119252	PTHR32468:SF10 - CATION/H(+) ANTIPORTER 20
Phvul.003G203300	1.40218	3.16142	2.25465	1.1729	0.0145039	Very-long-chain 3-oxoacyl-CoA reductase / Very-long-chain beta-ketoacyl-CoA reductase
Phvul.011G182800	4.20202	9.47231	2.25423	1.17263	0.0156589	PF00407 - Pathogenesis-related protein Bet v I family (Bet_v_1)
Phvul.003G290600	1.91186	4.30325	2.25082	1.17045	0.00119252	PTHR13301//PTHR13301:SF41 - X-BOX TRANSCRIPTION FACTOR-RELATED // SUBFAMILY NOT NAMED
Phvul.011G024700	5.48071	12.3165	2.24725	1.16815	0.00119252	PTHR31989:SF2 - NAC DOMAIN CONTAINING PROTEIN 36
Phvul.004G029500	6.83791	15.3663	2.24722	1.16814	0.00119252	K13691 - pathogen-inducible salicylic acid glucosyltransferase [EC:2.4.1.-] Glc b1-2 SA (SGT1)
Phvul.009G234500	3.39237	7.62144	2.24664	1.16777	0.00119252	KOG0617 - Ras suppressor protein (contains leucine-rich repeats)
Phvul.009G172100	7.52822	16.8937	2.24405	1.16611	0.00119252	Costunolide synthase
Phvul.005G008300	11.4841	25.7222	2.23981	1.16338	0.00119252	PTHR10788:SF38 - TREHALOSE-PHOSPHATE PHOSPHATASE F-RELATED
Phvul.005G072700	5.15477	11.5277	2.23632	1.16112	0.00854285	PTHR33227:SF2 - F8L10.2 PROTEIN
Phvul.004G018000	1.05341	2.35257	2.23329	1.15917	0.0106059	PTHR11699:SF180 - ALDEHYDE DEHYDROGENASE FAMILY 2 MEMBER B7, MITOCHONDRIAL
Phvul.006G194100	1.71903	3.83888	2.23317	1.15909	0.00119252	PTHR27002:SF84 - ATP BINDING / PROTEIN KINASE-RELATED
Phvul.001G159300	7.31633	16.3193	2.23053	1.15738	0.00119252	PTHR31529:SF10 - LOB DOMAIN-CONTAINING PROTEIN 16
Phvul.007G167200	59.408	132.452	2.22953	1.15674	0.00119252	Peroxidase / Lactoperoxidase
Phvul.003G087900	3.27396	7.29382	2.22783	1.15564	0.011265	PTHR31964:SF10 - ADENINE NUCLEOTIDE ALPHA HYDROLASES-LIKE SUPERFAMILY PROTEIN
Phvul.L002132	5.50465	12.2495	2.2253	1.154	0.00119252	PTHR11730:SF39 - AMMONIUM TRANSPORTER 1 MEMBER 2
Phvul.010G058800	3.22437	7.16841	2.2232	1.15264	0.00216493	PTHR31284:SF9 - HAD SUPERFAMILY, SUBFAMILY IIIB ACID PHOSPHATASE
Phvul.003G268400	1.9144	4.23751	2.21349	1.14633	0.00552327	PF03087 - Arabidopsis protein of unknown function (DUF241)
Phvul.007G225100	36.5997	80.9416	2.21154	1.14505	0.00119252	PTHR14255//PTHR14255:SF5 - ATP-DEPENDENT PROTEASE CEREBLON // SUBFAMILY NOT NAMED
Phvul.001G126600	5.10696	11.2822	2.20918	1.14351	0.00119252	NA_SP
Phvul.009G220700	2.94797	6.51197	2.20897	1.14337	0.00119252	PF03106 - WRKY DNA -binding domain (WRKY)
Phvul.011G165700	7.57347	16.7114	2.20657	1.1418	0.00119252	PF04859 - Plant protein of unknown function (DUF641) (DUF641)
Phvul.011G030000	1.10002	2.42717	2.20648	1.14175	0.00119252	PTHR11017//PTHR11017:SF167 - LEUCINE-RICH REPEAT-CONTAINING PROTEIN // SUBFAMILY NOT NAMED
Phvul.003G214350	2.26747	4.99911	2.20471	1.14059	0.00216493	PTHR24298:SF114 - CYTOCHROME P450 - LIKE PROTEIN-RELATED
Phvul.007G049300	3.86728	8.52326	2.20394	1.14008	0.00994464	PTHR32099:SF4 - CYSTEINE-RICH REPEAT SECRETORY PROTEIN 1-RELATED
Phvul.010G048700	14.468	31.8856	2.20387	1.14004	0.00119252	NA_SP
Phvul.008G285000	2.42071	5.32908	2.20145	1.13846	0.00119252	KOG0204 - Calcium transporting ATPase
Phvul.001G190500	5.57318	12.2574	2.19935	1.13707	0.00633847	PTHR33148:SF2 - EMB
Phvul.011G206400	2.0993	4.61362	2.19769	1.13599	0.00552327	PTHR31604:SF2 - PROTEIN SHI RELATED SEQUENCE 6
Phvul.005G015100	1.704	3.74093	2.19538	1.13447	0.00925439	PTHR27002:SF95 - G-TYPE LECTIN S-RECEPTOR-LIKE SERINE/THREONINE-PROTEIN KINASE B120
Phvul.001G139500	1.09744	2.40732	2.19358	1.13328	0.0204901	1.14.13.28 - 3,9-dihydroxypterocarpan 6A-monooxygenase / 3,9-dihydroxypterocarpan 6A-hydroxylase
Phvul.003G009200	19.7717	43.3602	2.19304	1.13293	0.00119252	PF00067 - Cytochrome P450 (p450)
Phvul.010G089600	0.987364	2.16506	2.19277	1.13275	0.0437003	K15277 - solute carrier family 35 (adenosine 3'-phospho 5'-phosphosulfate transporter), member B3 (SLC35B3, PAPST2)
Phvul.011G153400	39.1598	85.7189	2.18895	1.13024	0.00119252	PTHR31901:SF2 - INDOLE-3-ACETIC ACID-AMIDO SYNTHETASE GH3.5-RELATED
Phvul.003G253000	7.43372	16.2604	2.18738	1.12921	0.00119252	PTHR14255//PTHR14255:SF11 - ATP-DEPENDENT PROTEASE CEREBLON // SUBFAMILY NOT NAMED
Phvul.010G087800	2.01751	4.40163	2.18171	1.12546	0.00119252	PTHR23054:SF14 - PROTEIN Y45F10A.7, ISOFORM A
Phvul.009G228300	26.9208	58.7088	2.1808	1.12485	0.00119252	PF07876 - Stress responsive A/B Barrel Domain (Dabb)
Phvul.001G225000	9.90031	21.5791	2.17964	1.12409	0.00119252	2.5.1.43 - Nicotianamine synthase
Phvul.004G068200	1.44749	3.14869	2.17528	1.1212	0.0303476	1.14.13.89 - Isoflavone 2'-hydroxylase / Isoflavone 2'-monooxygenase
Phvul.010G104200	1.18684	2.57695	2.17127	1.11854	0.0437003	K13425 - WRKY transcription factor 22 (WRKY22)
Phvul.001G251900	22.6012	49.0173	2.16879	1.11689	0.00119252	NA_SP
Phvul.005G095300	0.481278	1.04149	2.16401	1.11371	0.0465972	K01595 - phosphoenolpyruvate carboxylase (ppc)
Phvul.010G066500	10.1172	21.7727	2.15205	1.10571	0.00119252	PF00234 - Protease inhibitor/seed storage/LTP family (Tryp_alpha_amyl)
Phvul.007G195100	2.83753	6.10332	2.15093	1.10496	0.0167984	PTHR31529:SF10 - LOB DOMAIN-CONTAINING PROTEIN 16
Phvul.008G093500	9.38045	20.1317	2.14613	1.10174	0.00395223	NA_SP
Phvul.007G076300	14.6549	31.4084	2.1432	1.09977	0.00119252	PTHR23074//PTHR23074:SF98 - AAA ATPASE // SUBFAMILY NOT NAMED
Phvul.001G163700	0.489692	1.04684	2.13775	1.09609	0.0266921	PF00069//PF00560//PF08263//PF13855 - Protein kinase domain (Pkinase) // Leucine Rich Repeat (LRR_1)
Phvul.011G044500	2.98659	6.38306	2.13724	1.09575	0.0126296	PTHR10366//PTHR10366:SF375 - NAD DEPENDENT EPIMERASE/DEHYDRATASE // SUBFAMILY NOT NAMED
Phvul.009G042400	23.0046	49.052	2.13227	1.09239	0.00119252	PTHR10992:SF840 - METHYLESTERASE 17-RELATED
Phvul.002G077100	1.62157	3.45368	2.12984	1.09075	0.00216493	PTHR23213:SF239 - FORMIN-LIKE PROTEIN 4-RELATED
Phvul.010G117500	12.7888	27.2268	2.12896	1.09015	0.00119252	K14488 - SAUR family protein (SAUR)
Phvul.008G048600	2.93362	6.24353	2.12827	1.08968	0.00633847	NA_SP
Phvul.009G029800	7.82911	16.6603	2.12799	1.08949	0.00119252	PTHR10788:SF25 - TREHALOSE-PHOSPHATE PHOSPHATASE D-RELATED
Phvul.008G146000	1.63247	3.47379	2.12793	1.08945	0.00119252	PF00069//PF00560//PF08263//PF13855 - Protein kinase domain (Pkinase) // Leucine Rich Repeat (LRR_1)
Phvul.005G099300	5.08832	10.8268	2.12777	1.08935	0.00119252	PTHR24073:SF553 - RAS-RELATED PROTEIN RABA1G
Phvul.006G005400	3.76318	7.99922	2.12565	1.08791	0.00119252	PTHR24096:SF219 - LONG CHAIN ACYL-COA SYNTHETASE 8
Phvul.003G169100	3.18083	6.74965	2.12198	1.08541	0.00704558	PF14547 - Hydrophobic seed protein (Hydrophob_seed)
Phvul.002G049400	6.87778	14.5891	2.12119	1.08488	0.00119252	PF01657//PF07714 - Salt stress response/antifungal (Stress-antifung) // Protein tyrosine kinase (Pkinase_Tyr)
Phvul.003G218900	209.02	441.665	2.11303	1.07931	0.00119252	PF14547 - Hydrophobic seed protein (Hydrophob_seed)
Phvul.001G196400	3.38539	7.15292	2.11288	1.07921	0.00119252	PTHR19957:SF69 - SYNTAXIN-121-RELATED
Phvul.008G267600	9.14337	19.3031	2.11116	1.07803	0.00119252	PF01582//PF13676 - TIR domain (TIR) // TIR domain (TIR_2)
Phvul.011G161100	19.0998	40.2354	2.10659	1.07491	0.00119252	1.14.13.173 - 11-oxo-beta-amyrin 30-oxidase / CYP72A154
Phvul.002G159400	4.92066	10.3599	2.10539	1.07409	0.00925439	PTHR33403:SF2 - PROTEIN SPIRAL1-LIKE 5
Phvul.009G134700	17.2109	36.2049	2.1036	1.07286	0.00119252	PTHR11695//PTHR11695:SF432 - ALCOHOL DEHYDROGENASE RELATED // SUBFAMILY NOT NAMED
Phvul.007G082700	3.13333	6.58598	2.10191	1.0717	0.00216493	1.11.1.7 - Peroxidase / Lactoperoxidase
Phvul.009G132200	45.3956	95.3941	2.1014	1.07135	0.00119252	NA_SP
Phvul.003G007200	2.59158	5.44086	2.09944	1.07	0.00119252	PTHR23054:SF14 - PROTEIN Y45F10A.7, ISOFORM A
Phvul.001G155201	4.92803	10.3371	2.09761	1.06875	0.00307701	PF00122//PF00690 - E1-E2 ATPase (E1-E2_ATPase) // Cation transporter/ATPase, N-terminus (Cation_ATPase_N)
Phvul.003G147300	2.84547	5.96362	2.09583	1.06752	0.00552327	PTHR31062:SF47 - XYLOGLUCAN ENDOTRANSGLUCOSYLASE/HYDROLASE PROTEIN 21-RELATED
Phvul.007G049400	12.4915	26.1635	2.0945	1.06661	0.00119252	PTHR27002:SF122 - CYSTEINE-RICH RECEPTOR-LIKE PROTEIN KINASE 28-RELATED
Phvul.001G160600	44.2222	92.5437	2.0927	1.06536	0.00119252	PTHR24064:SF274 - INORGANIC PHOSPHATE TRANSPORTER 1-4
Phvul.001G071500	2.80777	5.87207	2.09136	1.06445	0.00119252	PTHR22950:SF205 - AMINO ACID PERMEASE 3-RELATED
Phvul.010G160800	6.65403	13.8956	2.0883	1.06233	0.00119252	K03322 - manganese transport protein (mntH)
Phvul.003G283900	0.889092	1.8558	2.0873	1.06164	0.00779544	PTHR24221:SF138 - LP14331P-RELATED
Phvul.007G196100	13.6383	28.4404	2.08533	1.06027	0.00119252	PTHR10593:SF31 - C2H2-LIKE ZINC FINGER PROTEIN-RELATED
Phvul.009G115800	2.01598	4.19705	2.08189	1.05789	0.00119252	PTHR32002:SF3 - PROTEIN NLP1-RELATED
Phvul.008G238100	7.39559	15.3853	2.08033	1.05682	0.00119252	PTHR10217:SF478 - POTASSIUM CHANNEL GORK-RELATED
Phvul.004G049800	8.85467	18.4169	2.07991	1.05652	0.00119252	PTHR12266:SF2 - CATION/CALCIUM EXCHANGER 1
Phvul.008G015100	4.42131	9.16592	2.07312	1.05181	0.00216493	PTHR31407:SF4 - PSBP-LIKE PROTEIN 1, CHLOROPLASTIC
Phvul.009G122700	1.46553	2.97337	2.02887	1.05133	0.00119252	GRAS Family Transcription Factor
Phvul.008G261500	19.1553	39.6701	2.07097	1.05031	0.00119252	K07300 - Ca2+:H+ antiporter (chaA, CAX)
Phvul.007G047700	11.5061	23.809	2.06925	1.04911	0.00119252	2.7.1.134//2.7.1.159 - Inositol-tetrakisphosphate 1-kinase / Inositol-trisphosphate 6-kinase // Inositol-1,3,4-trisphosphate 5/6-kinase
Phvul.007G227100	5.15885	10.6595	2.06626	1.04702	0.00119252	K14488 - SAUR family protein (SAUR)
Phvul.003G248025	2.44796	5.05209	2.0638	1.0453	0.0316291	PTHR10992:SF820 - METHYLESTERASE 1-RELATED
Phvul.010G026300	1.61561	3.33331	2.06319	1.04488	0.0385527	PTHR11017//PTHR11017:SF163 - LEUCINE-RICH REPEAT-CONTAINING PROTEIN // SUBFAMILY NOT NAMED
Phvul.003G227700	18.258	37.5884	2.05874	1.04176	0.00119252	PF04043 - Plant invertase/pectin methylesterase inhibitor (PMEI)
Phvul.003G218800	98.6716	203.064	2.05798	1.04123	0.00119252	PF14547 - Hydrophobic seed protein (Hydrophob_seed)
Phvul.001G251600	2.02849	4.16568	2.05359	1.03815	0.00216493	PF05678 - VQ motif (VQ)
Phvul.005G021900	14.6712	30.0954	2.05133	1.03656	0.00119252	PTHR11206:SF156 - MATE EFFLUX FAMILY PROTEIN FRD3
Phvul.006G101600	66.1773	135.443	2.04667	1.03328	0.00119252	5.1.3.18 - GDP-mannose 3,5-epimerase
Phvul.011G008000	146.44	299.574	2.04571	1.0326	0.00119252	NA_SP
Phvul.006G187700	4.24819	8.68802	2.04511	1.03218	0.00474738	2.7.11.1 - Non-specific serine/threonine protein kinase / Threonine-specific protein kinase
Phvul.007G081400	6.86817	14.0462	2.04512	1.03218	0.0180738	NA_SP
Phvul.010G062200	5.62228	11.4845	2.04268	1.03045	0.00119252	K14685 - solute carrier family 40 (iron-regulated transporter), member 1 (SLC40A1, FPN1)
Phvul.003G192700	22.3825	45.7006	2.0418	1.02984	0.00119252	PTHR10264:SF92 - HYPERSENSITIVE-INDUCED RESPONSE PROTEIN 1
Phvul.003G233000	12.6075	25.7352	2.04126	1.02946	0.00216493	NA_SP
Phvul.008G152200	4.83071	9.85533	2.04014	1.02867	0.00119252	PTHR30540:SF18 - POTASSIUM TRANSPORTER 8
Phvul.003G030601	6.74992	13.7689	2.03986	1.02847	0.00552327	PF05678 - VQ motif (VQ)
Phvul.005G077600	3.36065	6.84879	2.03794	1.02711	0.00119252	PF07714//PF11721 - Protein tyrosine kinase (Pkinase_Tyr) // Di-glucose binding within endoplasmic reticulum (Malectin)
Phvul.005G078500	15.0346	30.6185	2.03654	1.02612	0.00119252	PF00069//PF11721 - Protein kinase domain (Pkinase) // Di-glucose binding within endoplasmic reticulum (Malectin)
Phvul.004G103900	8.56779	17.4264	2.03394	1.02428	0.00119252	2.4.1.170 - Isoflavone 7-O-glucosyltransferase
Phvul.009G256400	108.267	220.208	2.03393	1.02427	0.00119252	3.2.1.39 - Glucan endo-1,3-beta-D-glucosidase / Laminarinase
Phvul.009G251600	30.2594	61.4833	2.03187	1.02281	0.00119252	K09286 - EREBP-like factor (EREBP)
Phvul.002G061900	45.0996	91.5129	2.02913	1.02086	0.00119252	3.6.3.26 - Nitrate-transporting ATPase
Phvul.009G024700	42.7768	86.7995	2.02913	1.02086	0.00119252	PF03181 - BURP domain (BURP)
Phvul.002G163500	25.8338	52.414	2.02889	1.02069	0.00552327	PTHR10641//PTHR10641:SF620 - MYB-LIKE DNA-BINDING PROTEIN MYB // SUBFAMILY NOT NAMED
Phvul.010G060200	6.49683	13.1805	2.02876	1.0206	0.00119252	PTHR31087:SF22 - PROTEIN LURP-ONE-RELATED 8
Phvul.002G111300	78.8622	159.907	2.02768	1.01983	0.00119252	PTHR10374//PTHR10374:SF23 - LACTOYLGLUTATHIONE LYASE GLYOXALASE I // SUBFAMILY NOT NAMED
Phvul.002G286000	2.15565	4.36036	2.02276	1.01632	0.00704558	PTHR31251:SF20 - SQUAMOSA PROMOTER-BINDING-LIKE PROTEIN 13A-RELATED
Phvul.003G292900	50.7711	102.645	2.02172	1.01559	0.00119252	PF04749 - PLAC8 family (PLAC8)
Phvul.010G065400	6.51792	13.1711	2.02075	1.0149	0.0138572	PTHR31213:SF3 - ABSCISIC ACID RECEPTOR PYL4
Phvul.010G054200	12.3385	24.9038	2.01838	1.0132	0.00119252	PTHR11017//PTHR11017:SF155 - LEUCINE-RICH REPEAT-CONTAINING PROTEIN // SUBFAMILY NOT NAMED
Phvul.011G181432	2.64555	5.33863	2.01797	1.0129	0.0204901	PTHR11017//PTHR11017:SF162 - LEUCINE-RICH REPEAT-CONTAINING PROTEIN // SUBFAMILY NOT NAMED
Phvul.004G136300	11.9723	24.1489	2.01706	1.01226	0.00119252	PTHR24286:SF83 - CYTOCHROME P450 SUPERFAMILY PROTEIN
Phvul.011G100800	21.742	43.8445	2.01658	1.01191	0.00119252	PTHR23024//PTHR23024:SF189 - MEMBER OF 'GDXG' FAMILY OF LIPOLYTIC ENZYMES // SUBFAMILY NOT NAMED
Phvul.009G262900	1.31508	2.64598	2.01203	1.00864	0.00704558	PTHR11771:SF38 - LIPOXYGENASE 3, CHLOROPLASTIC-RELATED
Phvul.006G116100	4.35431	8.75073	2.00967	1.00696	0.011265	PF02519 - Auxin responsive protein (Auxin_inducible)
Phvul.007G218700	105.475	211.964	2.00961	1.00691	0.00119252	PTHR33509:SF5 - LATE EMBRYOGENESIS ABUNDANT 3 (LEA3) FAMILY PROTEIN
Phvul.011G081800	3.6988	7.42512	2.00744	1.00536	0.00119252	2.7.11.1 - Non-specific serine/threonine protein kinase / Threonine-specific protein kinase
Phvul.006G129800	136.602	274.114	2.00666	1.0048	0.00119252	PTHR31388:SF22 - PEROXIDASE 22-RELATED
Phvul.008G041100	196.468	393.74	2.00409	1.00295	0.00119252	PTHR19139//PTHR19139:SF142 - AQUAPORIN TRANSPORTER // SUBFAMILY NOT NAMED
Phvul.003G246200	22.6944	45.4606	2.00316	1.00228	0.00119252	K15634 - probable phosphoglycerate mutase (gpmB)
Phvul.009G231700	2.59893	5.20237	2.00174	1.00125	0.00552327	PTHR13878//PTHR13878:SF14 - GULONOLACTONE OXIDASE // SUBFAMILY NOT NAMED
Phvul.009G090700	0.150816	0.320268	2.12357	1.00075	0.0192958	Flotillin (FLOT)
Phvul.005G042200	12.6946	6.34529	0.499842	-1.00046	0.0132304	NA_SP
Phvul.005G037800	12.7044	6.32825	0.498115	-1.00545	0.00119252	K01209 - alpha-N-arabinofuranosidase (E3.2.1.55, abfA)
Phvul.002G167100	44.3452	22.0052	0.496225	-1.01094	0.00119252	PTHR10438:SF274 - THIOREDOXIN H1
Phvul.002G309100	12.2845	6.09043	0.495782	-1.01223	0.00119252	PTHR13832//PTHR13832:SF357 - PROTEIN PHOSPHATASE 2C // SUBFAMILY NOT NAMED
Phvul.003G293200	12.139	5.98309	0.492882	-1.02069	0.00119252	4.2.3.19 - Ent-kaurene synthase / Ent-kaurene synthetase B
Phvul.008G241900	13.7512	6.76839	0.492204	-1.02268	0.00552327	NA_SP
Phvul.008G212300	6.59386	3.24035	0.491419	-1.02497	0.00119252	PTHR11654:SF154 - PROTEIN NRT1/ PTR FAMILY 6.4
Phvul.010G090300	3.30901	1.6261	0.491416	-1.02498	0.00119252	K09338 - homeobox-leucine zipper protein (HD-ZIP)
Phvul.010G129700	801.092	392.281	0.489683	-1.03008	0.00119252	PF07883 - Cupin domain (Cupin_2)
Phvul.006G216900	21.6786	10.6121	0.48952	-1.03056	0.00119252	PTHR31942:SF9 - MLO-LIKE PROTEIN 4
Phvul.004G121666	2.31602	1.13053	0.488135	-1.03465	0.00119252	K02112 - F-type H+-transporting ATPase subunit beta (ATPF1B, atpD)
Phvul.006G094400	20.2454	9.86923	0.48748	-1.03658	0.0465972	NA_SP
Phvul.003G007900	4.06863	1.97724	0.485972	-1.04105	0.0346981	K12736 - peptidylprolyl isomerase domain and WD repeat-containing protein 1 [EC:5.2.1.8] (PPWD1)
Phvul.003G245601	12.6778	6.13972	0.484289	-1.04606	0.00307701	NA_SP
Phvul.006G022300	5.19974	2.51619	0.483907	-1.0472	0.00633847	PF03188 - Eukaryotic cytochrome b561 (Cytochrom_B561)
Phvul.001G213401	3.85577	1.86546	0.48381	-1.04748	0.0233768	PF03514 - GRAS domain family (GRAS)
Phvul.002G020200	50.9431	24.5645	0.482195	-1.05231	0.00119252	NA_SP
Phvul.004G132600	6.18539	2.98212	0.482123	-1.05253	0.0145039	PF05633 - Protein of unknown function (DUF793) (DUF793)
Phvul.003G100400	10.257	4.9444	0.482051	-1.05275	0.0132304	PTHR20863:SF29 - ACYL CARRIER PROTEIN 1, CHLOROPLASTIC-RELATED
Phvul.006G053900	1.50906	0.725732	0.480917	-1.05614	0.00395223	3.6.3.44 - Xenobiotic-transporting ATPase / Steroid-transporting ATPase
Phvul.006G186600	12.3389	5.89676	0.4779	-1.06522	0.00119252	PTHR11772//PTHR11772:SF19 - ASPARAGINE SYNTHETASE // SUBFAMILY NOT NAMED
Phvul.008G104900	28.925	13.7699	0.476055	-1.0708	0.00119252	PTHR15315:SF31 - C3HC4 TYPE RING FINGER PROTEIN
Phvul.002G122800	3.19601	1.5094	0.472276	-1.0823	0.0424736	PF03350 - Uncharacterized protein family, UPF0114 (UPF0114)
Phvul.002G013800	2.82056	1.33098	0.471885	-1.08349	0.0366301	PTHR10992:SF776 - ESTERASE KAI2-RELATED
Phvul.007G101400	6.92156	3.24914	0.469423	-1.09104	0.0313145	NA_SP
Phvul.007G198700	2.79839	1.31251	0.469023	-1.09226	0.0271234	PTHR13832//PTHR13832:SF276 - PROTEIN PHOSPHATASE 2C // SUBFAMILY NOT NAMED
Phvul.003G293300	7.58116	3.55566	0.469013	-1.0923	0.00119252	PTHR10209//PTHR10209:SF98 - OXIDOREDUCTASE, 2OG-FE II OXYGENASE FAMILY PROTEIN // SUBFAMILY NOT NAMED
Phvul.006G045500	5331.39	2496.72	0.468306	-1.09448	0.00119252	NA_SP
Phvul.009G062900	23.9703	11.2199	0.468075	-1.09519	0.00119252	PTHR23054:SF29 - EXPRESSED PROTEIN
Phvul.007G064400	77.9102	36.4266	0.467546	-1.09682	0.00119252	PTHR13935:SF54 - TRANSCRIPTION FACTOR BHLH118-RELATED
Phvul.002G090301	13.8939	6.49298	0.467326	-1.0975	0.0390137	PTHR10381:SF19 - ATP-DEPENDENT CLP PROTEASE PROTEOLYTIC SUBUNIT 1
Phvul.006G001200	336.474	157.032	0.466699	-1.09944	0.00119252	PTHR31568:SF16 - GENOMIC DNA, CHROMOSOME 3, P1 CLONE: MMP21
Phvul.002G196050	185.357	86.3805	0.466022	-1.10153	0.00119252	NA_SP
Phvul.006G077200	39.4946	18.3925	0.465697	-1.10254	0.00119252	PTHR31867:SF22 - EXPANSIN-A8
Phvul.007G057600	42.2408	19.6705	0.465675	-1.1026	0.00119252	PTHR10314//PTHR10314:SF101 - SER/THR DEHYDRATASE, TRP SYNTHASE // SUBFAMILY NOT NAMED
Phvul.008G236800	3.24332	1.51033	0.465674	-1.10261	0.0419582	PTHR22835//PTHR22835:SF150 - ZINC FINGER FYVE DOMAIN CONTAINING PROTEIN // SUBFAMILY NOT NAMED
Phvul.008G040500	5.68359	2.64645	0.46563	-1.10274	0.00119252	PTHR11654:SF90 - PROTEIN NRT1/ PTR FAMILY 7.2
Phvul.005G171800	9.00999	4.19194	0.465255	-1.10391	0.00119252	PTHR11814:SF85 - SULFATE TRANSPORTER 3.4-RELATED
Phvul.001G147900	15.3133	7.11888	0.464882	-1.10506	0.00307701	NA_SP
Phvul.009G026400	7.45683	3.46551	0.464743	-1.1055	0.00119252	PTHR11680:SF7 - SERINE HYDROXYMETHYLTRANSFERASE 6-RELATED
Phvul.004G123200	5.72058	2.65649	0.464374	-1.10664	0.00119252	PTHR21726:SF51 - GENOMIC DNA, CHROMOSOME 5, P1 CLONE:MTG10
Phvul.007G065200	7.6712	3.56161	0.464283	-1.10692	0.00307701	PTHR10584//PTHR10584:SF200 - SUGAR KINASE // SUBFAMILY NOT NAMED
Phvul.009G112000	3.51941	1.62908	0.462884	-1.11128	0.00216493	PTHR22950//PTHR22950:SF208 - AMINO ACID TRANSPORTER // SUBFAMILY NOT NAMED
Phvul.003G139400	7.4596	3.44366	0.461641	-1.11516	0.011265	NA_SP
Phvul.001G067300	3.37205	1.55614	0.461482	-1.11566	0.0327282	PTHR11695//PTHR11695:SF493 - ALCOHOL DEHYDROGENASE RELATED // SUBFAMILY NOT NAMED
Phvul.008G094800	4.62582	2.13233	0.460963	-1.11728	0.00307701	PF00249 - Myb-like DNA-binding domain (Myb_DNA-binding)
Phvul.010G141200	7.55907	3.48114	0.460525	-1.11865	0.00307701	3.1.3.75 - Phosphoethanolamine/phosphocholine phosphatase / PHOSPHO1
Phvul.009G148300	7.97758	3.67207	0.460299	-1.11936	0.00119252	PTHR14221//PTHR14221:SF8 - WD REPEAT DOMAIN 44 // SUBFAMILY NOT NAMED
Phvul.004G042900	7.80101	3.58688	0.459797	-1.12093	0.00119252	PTHR11926//PTHR11926:SF280 - GLUCOSYL/GLUCURONOSYL TRANSFERASES // SUBFAMILY NOT NAMED
Phvul.007G192100	19.2703	8.8413	0.458804	-1.12405	0.00119252	PF02365 - No apical meristem (NAM) protein (NAM)
Phvul.001G140700	6.80484	3.12018	0.458524	-1.12493	0.00779544	PTHR12231:SF111 - MATRIX-REMODELING-ASSOCIATED PROTEIN 8
Phvul.001G263200	74.3496	33.9247	0.456286	-1.13199	0.0482853	PF11820 - Protein of unknown function (DUF3339) (DUF3339)
Phvul.003G062400	2.9196	1.32854	0.455042	-1.13593	0.0266921	PTHR32285:SF4 - PROTEIN TRICHOME BIREFRINGENCE-LIKE 2
Phvul.001G053900	10.1335	4.60462	0.454396	-1.13798	0.00119252	PTHR13789//PTHR13789:SF213 - MONOOXYGENASE // SUBFAMILY NOT NAMED
Phvul.006G030900	2.07255	0.939357	0.453237	-1.14166	0.0204901	PF00168 - C2 domain (C2)
Phvul.009G017800	7.07975	3.18883	0.450416	-1.15067	0.0465972	NA_SP
Phvul.003G212900	5.37799	2.41616	0.449268	-1.15435	0.00307701	NA_SP
Phvul.007G138800	17.7106	7.93469	0.448019	-1.15837	0.00119252	PTHR34213:SF2 - NUCLEAR TRANSPORT FACTOR 2 (NTF2) FAMILY PROTEIN
Phvul.011G046700	103.491	46.2735	0.447126	-1.16124	0.00119252	PTHR23500:SF109 - POLYOL TRANSPORTER 5
Phvul.005G054200	30.1558	13.4833	0.447121	-1.16126	0.00119252	PTHR11260:SF204 - GLUTATHIONE S-TRANSFERASE U21-RELATED
Phvul.011G040800	10.7979	4.82064	0.446442	-1.16346	0.00119252	PF00643 - B-box zinc finger (zf-B_box)
Phvul.003G140426	23.4935	10.4264	0.443799	-1.17202	0.00119252	NA_SP
Phvul.009G201600	1.31258	0.581061	0.442686	-1.17564	0.011973	K01530 - phospholipid-translocating ATPase (E3.6.3.1)
Phvul.009G175800	6.91657	3.04763	0.440627	-1.18237	0.00119252	K13525 - transitional endoplasmic reticulum ATPase (VCP, CDC48)
Phvul.007G239800	41.6868	18.3288	0.439679	-1.18548	0.00119252	PF00139 - Legume lectin domain (Lectin_legB)
Phvul.001G209600	73.6451	32.3095	0.438719	-1.18863	0.00119252	PTHR12526:SF348 - SUCROSE SYNTHASE 2
Phvul.003G238700	3.70574	1.61794	0.436604	-1.1956	0.00119252	K14487 - auxin responsive GH3 gene family (GH3)
Phvul.008G278800	10.9523	4.77778	0.436235	-1.19682	0.00854285	PTHR35708:SF1 - GB
Phvul.008G219800	10.6996	4.65981	0.435513	-1.19921	0.00119252	NA_SP
Phvul.002G004300	59.3796	25.8342	0.435069	-1.20069	0.00119252	3.1.3.58 - Sugar-terminal-phosphatase / Xylitol-5-phosphatase
Phvul.003G020200	3.8684	1.68119	0.434596	-1.20225	0.0132304	PTHR10209//PTHR10209:SF148 - OXIDOREDUCTASE, 2OG-FE II OXYGENASE FAMILY PROTEIN // SUBFAMILY NOT NAMED
Phvul.001G098300	159.088	69.1116	0.434424	-1.20283	0.00119252	PTHR31062:SF15 - XYLOGLUCAN ENDOTRANSGLUCOSYLASE/HYDROLASE PROTEIN 4-RELATED
Phvul.002G189200	6.06142	2.62475	0.433026	-1.20747	0.0337314	PTHR14155:SF74 - RING-H2 FINGER PROTEIN ATL45-RELATED
Phvul.011G074700	4.31916	1.86986	0.432922	-1.20782	0.0327282	PTHR32077:SF7 - FASCICLIN-LIKE ARABINOGALACTAN PROTEIN 11
Phvul.009G257100	2.6625	1.15238	0.432819	-1.20817	0.0145039	PTHR31561:SF1 - 3-KETOACYL-COA SYNTHASE 1-RELATED
Phvul.008G261200	9.96613	4.30351	0.431814	-1.21152	0.0446569	PTHR33469:SF1 - PROTEIN ELF4-LIKE 1
Phvul.007G128600	3.08898	1.33058	0.430751	-1.21508	0.0145039	PF00892 - EamA-like transporter family (EamA)
Phvul.001G182300	7.48243	3.20644	0.428529	-1.22253	0.00119252	K13496 - UDP-glucosyl transferase 73C [EC:2.4.1.-] Glc - brassinosteroid (UGT73C)
Phvul.002G060750	3.42828	1.46768	0.42811	-1.22395	0.0342274	PTHR31080:SF2 - F23N19.14-RELATED
Phvul.011G136600	1.37244	0.58695	0.427669	-1.22543	0.0297984	PF05199//PF13450 - GMC oxidoreductase (GMC_oxred_C) // NAD(P)-binding Rossmann-like domain (NAD_binding_8)
Phvul.011G077200	9.58537	4.07665	0.425299	-1.23345	0.00633847	PTHR32077:SF7 - FASCICLIN-LIKE ARABINOGALACTAN PROTEIN 11
Phvul.009G229900	30.6952	13.0455	0.425001	-1.23446	0.00119252	PTHR13832//PTHR13832:SF303 - PROTEIN PHOSPHATASE 2C // SUBFAMILY NOT NAMED
Phvul.005G094000	3.38013	1.43149	0.423501	-1.23956	0.0161866	KOG0716 - Molecular chaperone (DnaJ superfamily)
Phvul.009G162700	152.717	64.643	0.423286	-1.24029	0.00119252	PTHR10791:SF22 - BIDIRECTIONAL SUGAR TRANSPORTER SWEET10
Phvul.001G176100	35.7138	15.0914	0.422565	-1.24275	0.00119252	PF02365 - No apical meristem (NAM) protein (NAM)
Phvul.005G108500	5.30471	2.241	0.422455	-1.24313	0.0276382	PF12609 - Wound-induced protein (DUF3774)
Phvul.008G170800	5.78703	2.44382	0.422293	-1.24369	0.00119252	K17470 - sulfate transporter 1, high-affinity (SULTR1)
Phvul.007G278200	2.9431	1.24123	0.421742	-1.24556	0.0245319	PTHR10015:SF139 - HEAT STRESS TRANSCRIPTION FACTOR A-6A-RELATED
Phvul.002G163900	2.23608	0.942698	0.421585	-1.2461	0.0451056	PTHR13832//PTHR13832:SF294 - PROTEIN PHOSPHATASE 2C // SUBFAMILY NOT NAMED
Phvul.010G140700	53.9953	22.7429	0.421201	-1.24742	0.00119252	K13248 - pyridoxal phosphate phosphatase PHOSPHO2 (PHOSPHO2)
Phvul.003G203900	5.16994	2.17343	0.420398	-1.25018	0.00216493	PTHR10641//PTHR10641:SF466 - MYB-LIKE DNA-BINDING PROTEIN MYB // SUBFAMILY NOT NAMED
Phvul.010G141050	10.3555	4.33869	0.418974	-1.25507	0.00119252	3.1.3.75 - Phosphoethanolamine/phosphocholine phosphatase / PHOSPHO1
Phvul.007G045800	7.29577	3.03843	0.416465	-1.26373	0.00474738	NA_SP
Phvul.005G119300	1.27874	0.530296	0.414702	-1.26985	0.0106059	PTHR11850:SF111 - BEL1-LIKE HOMEODOMAIN PROTEIN 1-RELATED
Phvul.007G060300	23.6984	9.75984	0.411835	-1.27986	0.00119252	PTHR21091:SF114 - HOMOCYSTEINE S-METHYLTRANSFERASE 3
Phvul.001G092000	4.77447	1.96089	0.410703	-1.28384	0.0271234	NA_SP
Phvul.002G278116	2.49557	1.02189	0.409482	-1.28812	0.00307701	K01963 - acetyl-CoA carboxylase carboxyl transferase subunit beta (accD)
Phvul.002G241700	30.526	12.4966	0.409376	-1.2885	0.00119252	PTHR32077:SF7 - FASCICLIN-LIKE ARABINOGALACTAN PROTEIN 11
Phvul.007G092500	1.44153	0.588133	0.407992	-1.29338	0.0424736	K03231 - elongation factor 1-alpha (EEF1A)
Phvul.002G160700	23.6882	9.61589	0.405936	-1.30068	0.00119252	PTHR11972:SF69 - RESPIRATORY BURST OXIDASE HOMOLOG PROTEIN F-RELATED
Phvul.003G086700	20.7052	8.40256	0.405819	-1.30109	0.00119252	PF01190 - Pollen proteins Ole e I like (Pollen_Ole_e_I)
Phvul.003G170000	5.5163	2.23752	0.40562	-1.3018	0.00119252	PTHR20855//PTHR20855:SF32 - ADIPOR/PROGESTIN RECEPTOR-RELATED // SUBFAMILY NOT NAMED
Phvul.008G134100	32.0591	12.9919	0.405248	-1.30312	0.00119252	PTHR10209//PTHR10209:SF98 - OXIDOREDUCTASE, 2OG-FE II OXYGENASE FAMILY PROTEIN // SUBFAMILY NOT NAMED
Phvul.009G186000	6.28949	2.53548	0.40313	-1.31069	0.00216493	PTHR31744:SF7 - NAC DOMAIN-CONTAINING PROTEIN 100-RELATED
Phvul.003G020800	83.6061	33.6892	0.402951	-1.31132	0.00119252	1.11.2.3 - Plant seed peroxygenase / Soybean peroxygenase
Phvul.010G128000	2.40817	0.969981	0.402788	-1.31191	0.0437003	NA_SP
Phvul.009G000300	15.4432	6.20622	0.401874	-1.31518	0.00119252	PF00032 - Cytochrome b(C-terminal)/b6/petD (Cytochrom_B_C)
Phvul.001G004400	2.86671	1.14621	0.399835	-1.32252	0.0156589	PTHR22835//PTHR22835:SF227 - ZINC FINGER FYVE DOMAIN CONTAINING PROTEIN // SUBFAMILY NOT NAMED
Phvul.005G030200	11.7374	4.68673	0.399299	-1.32446	0.00119252	K17095 - annexin A7/11 (ANXA7_11)
Phvul.006G172100	8.71356	3.4789	0.399251	-1.32463	0.00307701	PTHR32077:SF7 - FASCICLIN-LIKE ARABINOGALACTAN PROTEIN 11
Phvul.008G057700	1.93189	0.770923	0.399051	-1.32536	0.0405458	2.1.1.158 - 7-methylxanthosine synthase / XRS1
Phvul.003G167700	2.94647	1.17012	0.397126	-1.33232	0.0266921	K14484 - auxin-responsive protein IAA (IAA)
Phvul.004G011800	24.6667	9.78842	0.396827	-1.33342	0.00119252	PTHR31375:SF34 - PECTIN LYASE-LIKE SUPERFAMILY PROTEIN
Phvul.003G225100	7.3065	2.89788	0.396617	-1.33418	0.00119252	1.4.1.3 - Glutamate dehydrogenase (NAD(P)(+)) / Glutamic dehydrogenase
Phvul.006G075000	2.19481	0.86842	0.39567	-1.33763	0.0271234	PTHR31147:SF9 - HXXXD-TYPE ACYL-TRANSFERASE FAMILY PROTEIN-RELATED
Phvul.009G254100	4.28735	1.69458	0.395251	-1.33916	0.00925439	NA_SP
Phvul.009G081400	9.62381	3.79964	0.394817	-1.34074	0.00307701	PTHR34455:SF1 - EXPRESSED PROTEIN
Phvul.003G232400	5.74345	2.2619	0.393823	-1.34438	0.00119252	PTHR11751:SF431 - 1-AMINOCYCLOPROPANE-1-CARBOXYLATE SYNTHASE 4-RELATED
Phvul.002G088400	6.09382	2.39889	0.393659	-1.34498	0.00474738	PTHR12565:SF148 - PROTEIN BANQUO 3
Phvul.002G260000	4.31793	1.69643	0.39288	-1.34783	0.00994464	NA_SP
Phvul.004G014666	24.314	9.53563	0.392187	-1.35039	0.00552327	1.2.1.2 - Formate dehydrogenase
Phvul.010G117200	55.4918	21.759	0.392112	-1.35066	0.00119252	PTHR24326:SF122 - HOMEOBOX-LEUCINE ZIPPER PROTEIN ATHB-12-RELATED
Phvul.011G203032	2.17652	0.852034	0.391466	-1.35304	0.0161866	PTHR23155//PTHR23155:SF414 - LEUCINE-RICH REPEAT-CONTAINING PROTEIN // SUBFAMILY NOT NAMED
Phvul.011G048600	6.97275	2.71932	0.389992	-1.35848	0.00633847	PTHR22924 - LEGHEMOGLOBIN-RELATED
Phvul.007G276700	427.494	166.452	0.389367	-1.3608	0.00119252	PF00045 - Hemopexin (Hemopexin)
Phvul.005G096400	15.814	6.13198	0.387756	-1.36678	0.00119252	NA_SP
Phvul.002G213000	20.2777	7.85093	0.387171	-1.36896	0.00119252	PF08507 - COPI associated protein (COPI_assoc)
Phvul.008G289700	2.10467	0.814697	0.38709	-1.36926	0.0437003	K08909 - light-harvesting complex I chlorophyll a/b binding protein 3 (LHCA3)
Phvul.005G004000	9.55034	3.66747	0.384015	-1.38077	0.00119252	K08905 - photosystem I subunit V (psaG)
Phvul.009G234800	8.15521	3.12789	0.383545	-1.38253	0.00552327	NA_SP
Phvul.003G189000	71.0261	27.2328	0.38342	-1.383	0.00119252	PTHR31744:SF7 - NAC DOMAIN-CONTAINING PROTEIN 100-RELATED
Phvul.008G034100	15.3253	5.86643	0.382794	-1.38536	0.00119252	PTHR11926//PTHR11926:SF265 - GLUCOSYL/GLUCURONOSYL TRANSFERASES // SUBFAMILY NOT NAMED
Phvul.011G104400	3.84322	1.46848	0.382096	-1.38799	0.00552327	PTHR24073:SF515 - GENOMIC DNA, CHROMOSOME 3, P1 CLONE: MSD21
Phvul.001G255000	10.5958	4.04471	0.381728	-1.38938	0.00119252	NA_SP
Phvul.011G152400	2.27979	0.867215	0.380392	-1.39444	0.00474738	PF00954//PF01453//PF07714//PF08276//PF11883 - S-locus glycoprotein domain (S_locus_glycop) // D-mannose binding lectin
Phvul.001G157300	5.04543	1.9111	0.378778	-1.40057	0.00119252	PTHR13890//PTHR13890:SF8 - RNA SPLICING PROTEIN MRS2, MITOCHONDRIAL // SUBFAMILY NOT NAMED
Phvul.002G082300	1.87555	0.709903	0.378504	-1.40162	0.0156589	PTHR12161:SF23 - REGULATOR OF VPS4 ACTIVITY IN THE MVB PATHWAY PROTEIN
Phvul.007G212500	2.77346	1.04842	0.378019	-1.40347	0.00119252	PTHR24096:SF111 - LONG CHAIN ACYL-COA SYNTHETASE 1
Phvul.008G168500	2.50657	0.945588	0.377244	-1.40643	0.00779544	PTHR11214:SF74 - BETA-1,3-GALACTOSYLTRANSFERASE 7-RELATED
Phvul.005G016400	3.29594	1.23739	0.375429	-1.41339	0.0138572	PTHR23024//PTHR23024:SF135 - MEMBER OF 'GDXG' FAMILY OF LIPOLYTIC ENZYMES // SUBFAMILY NOT NAMED
Phvul.004G088300	3.92397	1.47105	0.374888	-1.41547	0.00119252	K12124 - GIGANTEA (GI)
Phvul.006G161500	3.73925	1.40004	0.374417	-1.41728	0.00854285	PTHR10366//PTHR10366:SF389 - NAD DEPENDENT EPIMERASE/DEHYDRATASE // SUBFAMILY NOT NAMED
Phvul.009G168000	7.61002	2.84412	0.373734	-1.41992	0.00119252	PTHR33595:SF3 - EMB
Phvul.002G241600	15.6786	5.85147	0.373214	-1.42193	0.00119252	PTHR32077:SF7 - FASCICLIN-LIKE ARABINOGALACTAN PROTEIN 11
Phvul.007G214800	5.30095	1.95564	0.368923	-1.43861	0.00395223	PTHR31964:SF52 - DROUGHT RESPONSIVE ATP-BINDING MOTIF CONTAINING PROTEIN
Phvul.001G087300	3.42967	1.26404	0.36856	-1.44003	0.00216493	PTHR31717:SF3 - ZINC FINGER PROTEIN CONSTANS-LIKE 14-RELATED
Phvul.008G021300	66.7227	24.4467	0.366393	-1.44854	0.00119252	NA_SP
Phvul.001G207900	33.4306	12.2237	0.365644	-1.45149	0.00119252	PTHR33509:SF5 - LATE EMBRYOGENESIS ABUNDANT 3 (LEA3) FAMILY PROTEIN
Phvul.002G160600	2.12494	0.774385	0.364427	-1.4563	0.0433457	PTHR31087:SF14 - PROTEIN LURP-ONE-RELATED 17
Phvul.001G077000	35.4096	12.8872	0.363947	-1.4582	0.00119252	PTHR22950:SF278 - AMINO ACID PERMEASE 1-RELATED
Phvul.007G108200	4.27262	1.5548	0.363898	-1.45839	0.00216493	PTHR31165:SF13 - PROTEIN LIGHT-DEPENDENT SHORT HYPOCOTYLS 1-RELATED
Phvul.002G016500	13.3626	4.8456	0.362624	-1.46345	0.00119252	K18822 - soyasapogenol B glucuronide galactosyltransferase (UGT73P2)
Phvul.010G135701	1.44054	0.520542	0.361352	-1.46852	0.0410439	1.13.11.58 - Linoleate 9S-lipoxygenase / Linoleate 9-lipoxygenase
Phvul.003G029400	2.08044	0.748744	0.359897	-1.47434	0.00854285	NA_SP
Phvul.008G239500	3.94499	1.4189	0.359671	-1.47525	0.0271234	PF00582 - Universal stress protein family (Usp)
Phvul.004G062400	104.534	37.5658	0.359364	-1.47649	0.00119252	PTHR31062:SF15 - XYLOGLUCAN ENDOTRANSGLUCOSYLASE/HYDROLASE PROTEIN 4-RELATED
Phvul.001G089700	30.6003	10.9704	0.358506	-1.47993	0.00119252	PTHR31642:SF10 - ACYLTRANSFERASE-LIKE PROTEIN-RELATED
Phvul.001G238300	4.79768	1.71751	0.357988	-1.48202	0.00216493	NA_SP
Phvul.011G147800	5.88738	2.10313	0.357227	-1.48509	0.00119252	PTHR31719:SF34 - NAC DOMAIN-CONTAINING PROTEIN 19-RELATED
Phvul.001G129300	4.15455	1.47342	0.354652	-1.49552	0.00119252	PTHR11728:SF17 - 6-PHOSPHOGLUCONATE DEHYDROGENASE-LIKE PROTEIN
Phvul.007G212300	5.86003	2.06552	0.352476	-1.5044	0.00307701	PF07281 - Insulin-induced protein (INSIG) (INSIG)
Phvul.006G188900	1.79292	0.628919	0.350779	-1.51136	0.0400214	PF02365 - No apical meristem (NAM) protein (NAM)
Phvul.011G072200	2.08578	0.731289	0.350607	-1.51207	0.0370591	PTHR31301:SF14 - LOB DOMAIN-CONTAINING PROTEIN 1-RELATED
Phvul.L001647	10.2531	3.59394	0.350522	-1.51242	0.00119252	NA_SP
Phvul.005G151800	103.37	36.0857	0.349093	-1.51831	0.00119252	K01188 - beta-glucosidase (E3.2.1.21)
Phvul.001G061000	7.54921	2.6193	0.346963	-1.52715	0.00119252	PTHR14255//PTHR14255:SF1 - ATP-DEPENDENT PROTEASE CEREBLON // SUBFAMILY NOT NAMED
Phvul.005G038400	24.6794	8.55421	0.346613	-1.5286	0.00119252	NA_SP
Phvul.003G243350	7.06364	2.44529	0.34618	-1.53041	0.00119252	PTHR12565:SF74 - TRANSCRIPTION FACTOR HEC1
Phvul.002G332300	1.67556	0.580032	0.346172	-1.53044	0.00552327	PTHR11614:SF96 - ALPHA/BETA FOLD HYDROLASE FAMILY PROTEIN
Phvul.006G117011	16.0341	5.52441	0.344541	-1.53725	0.00395223	NA_SP
Phvul.003G154800	0.840016	0.287908	0.342741	-1.54481	0.04965	PTHR19375:SF229 - HEAT SHOCK 70 KDA PROTEIN 5
Phvul.009G083300	9.4379	3.22919	0.342151	-1.54729	0.00119252	2.7.11.1 - Non-specific serine/threonine protein kinase / Threonine-specific protein kinase
Phvul.003G079800	8.15035	2.77011	0.339876	-1.55692	0.00119252	1.8.4.10 - Adenylyl-sulfate reductase (thioredoxin) / Thioredoxin-dependent 5'-adenylylsulfate reductase
Phvul.005G038700	32.339	10.9617	0.338962	-1.5608	0.00119252	PTHR12452 - 42-9-9 PROTEIN-RELATED
Phvul.011G012801	3.48824	1.17443	0.336683	-1.57053	0.0156589	NA_SP
Phvul.010G073500	9.10501	3.04921	0.334894	-1.57823	0.00119252	K06910 - uncharacterized protein (K06910)
Phvul.001G147400	2.25474	0.751981	0.333511	-1.58419	0.00779544	PTHR14859 - CALCOFLUOR WHITE HYPERSENSITIVE PROTEIN PRECURSOR
Phvul.007G254800	3.66729	1.22011	0.332701	-1.5877	0.00474738	PTHR11206:SF128 - MATE EFFLUX FAMILY PROTEIN 1
Phvul.005G156900	810.427	268.541	0.331357	-1.59354	0.00119252	K15718 - linoleate 9S-lipoxygenase (LOX1_5)
Phvul.004G032300	1.16468	0.385019	0.330579	-1.59693	0.0150711	3.1.3.2//3.1.3.3//3.1.3.62//3.6.1.1//3.6.1.7 - Acid phosphatase / Phosphomonoesterase // Phosphoserine phosphatase
Phvul.002G116651	12.3658	4.08786	0.330578	-1.59694	0.00119252	PTHR10241:SF27 - DUO1-ACTIVATED WD40 1
Phvul.011G115215	6.12898	2.01879	0.329384	-1.60215	0.0126296	NA_SP
Phvul.011G033800	45.5728	15.0045	0.329242	-1.60278	0.00119252	PTHR24078:SF166 - LD21896P
Phvul.010G107400	1.16535	0.382487	0.328216	-1.60728	0.00395223	PTHR33322:SF4 - BAG FAMILY MOLECULAR CHAPERONE REGULATOR 6
Phvul.008G283100	11.925	3.89459	0.32659	-1.61445	0.00119252	PTHR12632:SF14 - NUCLEAR TRANSCRIPTION FACTOR Y SUBUNIT A-1-RELATED
Phvul.005G084500	39.5992	12.8868	0.325431	-1.61958	0.00119252	PTHR31719:SF34 - NAC DOMAIN-CONTAINING PROTEIN 19-RELATED
Phvul.005G108600	3.16295	1.01901	0.322171	-1.6341	0.00307701	PTHR34793:SF1 - PROTEIN THYLAKOID FORMATION 1, CHLOROPLASTIC
Phvul.003G236000	3.52632	1.13332	0.321389	-1.63761	0.00119252	3.5.1.49 - Formamidase / Formamide amidohydrolase
Phvul.010G151732	65.6444	21.0752	0.321051	-1.63912	0.00119252	PTHR31734:SF12 - AUXIN-RESPONSIVE PROTEIN IAA19-RELATED
Phvul.008G173200	2.7425	0.878649	0.320382	-1.64213	0.00216493	PTHR23500:SF44 - SUGAR TRANSPORT PROTEIN 5
Phvul.005G181400	6.90065	2.18804	0.317077	-1.65709	0.00119252	PTHR23042//PTHR23042:SF57 - CIRCADIAN PROTEIN CLOCK/ARNT/BMAL/PAS // SUBFAMILY NOT NAMED
Phvul.009G135400	4.24041	1.33803	0.315543	-1.6641	0.00119252	PF00892 - EamA-like transporter family (EamA)
Phvul.006G079500	7.17228	2.25815	0.314844	-1.66729	0.00119252	6.2.1.8 - Oxalate--CoA ligase / Oxalyl-CoA synthetase
Phvul.011G077700	45.2846	14.2121	0.31384	-1.6719	0.00119252	PTHR32077:SF7 - FASCICLIN-LIKE ARABINOGALACTAN PROTEIN 11
Phvul.011G048900	2.13222	0.66422	0.311516	-1.68262	0.0156589	PTHR13871:SF51 - CYSTEINE/HISTIDINE-RICH C1 DOMAIN FAMILY PROTEIN
Phvul.002G018600	4.39037	1.36253	0.310345	-1.68805	0.00119252	PF03763 - Remorin, C-terminal region (Remorin_C)
Phvul.002G179966	41.4171	12.8119	0.309338	-1.69274	0.00119252	3.1.1.11 - Pectinesterase / Pectin methylesterase
Phvul.008G266700	3.90908	1.20826	0.309091	-1.69389	0.00994464	PTHR14155 - RING FINGER DOMAIN-CONTAINING
Phvul.011G107900	4.43542	1.36926	0.30871	-1.69568	0.0161866	NA_SP
Phvul.005G045100	4.96444	1.53191	0.308577	-1.6963	0.0106059	PTHR33076:SF4 - NON-SPECIFIC LIPID-TRANSFER PROTEIN 8
Phvul.011G056564	2.22594	0.668664	0.300396	-1.73506	0.0342274	NA_SP
Phvul.011G074400	11.0635	3.31628	0.29975	-1.73818	0.00119252	PTHR32077:SF7 - FASCICLIN-LIKE ARABINOGALACTAN PROTEIN 11
Phvul.011G139100	1.69656	0.503914	0.297021	-1.75136	0.0233768	K03146 - thiamine thiazole synthase (THI4, THI1)
Phvul.004G158000	18.8154	5.55289	0.295125	-1.76061	0.00119252	PF00139 - Legume lectin domain (Lectin_legB)
Phvul.003G039000	0.959834	0.282153	0.29396	-1.76631	0.0419582	K13100 - pre-mRNA-splicing factor CWC22 (CWC22)
Phvul.003G206100	2.05078	0.594287	0.289786	-1.78694	0.00395223	4.99.1.6 - Indoleacetaldoxime dehydratase / Indoleacetaldoxime hydro-lyase
Phvul.003G207000	13.3185	3.83978	0.288304	-1.79434	0.00119252	PTHR22844:SF227 - SIMILARITY TO GTP-BINDING REGULATORY PROTEIN AND WD-REPEAT PROTEIN
Phvul.008G013300	2.06082	0.593047	0.287772	-1.797	0.00119252	PTHR10795:SF387 - SUBTILISIN-LIKE SERINE PROTEASE-RELATED
Phvul.004G119400	4.28559	1.23323	0.287762	-1.79705	0.00307701	NA_SP
Phvul.010G043400	12.0603	3.46334	0.287169	-1.80003	0.00119252	PTHR23042//PTHR23042:SF57 - CIRCADIAN PROTEIN CLOCK/ARNT/BMAL/PAS // SUBFAMILY NOT NAMED
Phvul.002G199200	1.67045	0.476318	0.285144	-1.81024	0.00395223	PTHR32448:SF34 - F22M8.11 PROTEIN-RELATED
Phvul.006G210800	2.77865	0.78607	0.282896	-1.82165	0.00854285	PTHR10791:SF34 - BIDIRECTIONAL SUGAR TRANSPORTER SWEET15
Phvul.008G112100	4.36053	1.23289	0.282739	-1.82246	0.00119252	PTHR11709:SF9 - LACCASE-7-RELATED
Phvul.005G151700	45.0446	12.6874	0.281663	-1.82796	0.00119252	K01188 - beta-glucosidase (E3.2.1.21)
Phvul.008G001200	6.50766	1.82459	0.280376	-1.83456	0.00119252	PTHR10791:SF34 - BIDIRECTIONAL SUGAR TRANSPORTER SWEET15
Phvul.008G091400	0.86501	0.240151	0.277628	-1.84878	0.0297984	PTHR23324:SF57 - PATELLIN-6
Phvul.005G012400	4.7866	1.30881	0.273432	-1.87075	0.00119252	KOG2615 - Permease of the major facilitator superfamily
Phvul.004G159300	1.35822	0.37094	0.273107	-1.87246	0.0106059	1.1.1.314 - Germacrene A alcohol dehydrogenase
Phvul.011G032300	9.02638	2.46013	0.272549	-1.87541	0.00119252	PF11267 - Domain of unknown function (DUF3067) (DUF3067)
Phvul.011G097000	161.46	43.7098	0.270716	-1.88515	0.00119252	1.1.1.198 - (+)-borneol dehydrogenase
Phvul.001G161700	3.37393	0.909918	0.269691	-1.89062	0.00216493	PF02365 - No apical meristem (NAM) protein (NAM)
Phvul.006G202300	2.19257	0.590509	0.269323	-1.89259	0.0332735	PF00319//PF01486 - SRF-type transcription factor (DNA-binding and dimerisation domain) (SRF-TF) // K-box region (K-box)
Phvul.010G134900	421.526	112.184	0.266138	-1.90975	0.00119252	1.13.11.12//1.13.11.58 - Linoleate 13S-lipoxygenase / Lipoxidase // Linoleate 9S-lipoxygenase / Linoleate 9-lipoxygenase
Phvul.003G151400	4.29245	1.1364	0.264744	-1.91733	0.035252	NA_SP
Phvul.006G039800	5.36211	1.40622	0.262251	-1.93098	0.00119252	PTHR24298:SF86 - CYTOCHROME P450 71B21-RELATED
Phvul.003G293600	1.20611	0.316131	0.262108	-1.93177	0.0385527	PTHR24343:SF162 - SERINE/THREONINE-PROTEIN KINASE SRK2E
Phvul.006G192900	7.94625	2.07293	0.260869	-1.9386	0.00119252	PTHR10641:SF586 - MYB TRANSCRIPTION FACTOR-RELATED
Phvul.010G087500	11.3498	2.8963	0.255185	-1.97039	0.00119252	K05282 - gibberellin 20-oxidase (E1.14.11.12)
Phvul.004G146600	10.4428	2.65138	0.253896	-1.97769	0.00119252	PTHR11200//PTHR11200:SF144 - INOSITOL 5-PHOSPHATASE // SUBFAMILY NOT NAMED
Phvul.L007443	7.98783	2.02669	0.253722	-1.97868	0.00119252	PTHR11040//PTHR11040:SF23 - ZINC/IRON TRANSPORTER // SUBFAMILY NOT NAMED
Phvul.003G117100	11.5811	2.93512	0.253441	-1.98028	0.00119252	PTHR31080:SF18 - CELL WALL / VACUOLAR INHIBITOR OF FRUCTOSIDASE 1-RELATED
Phvul.008G002700	1.60236	0.405339	0.252964	-1.983	0.00307701	PTHR10108//PTHR10108:SF782 - METHYLTRANSFERASE // SUBFAMILY NOT NAMED
Phvul.011G076900	9.01584	2.26721	0.25147	-1.99155	0.00119252	PTHR32077:SF7 - FASCICLIN-LIKE ARABINOGALACTAN PROTEIN 11
Phvul.004G124200	75.6677	18.9806	0.250842	-1.99515	0.00119252	PTHR13935:SF54 - TRANSCRIPTION FACTOR BHLH118-RELATED
Phvul.003G060700	1.17179	0.291402	0.248681	-2.00764	0.00779544	PTHR31945:SF14 - TRANSCRIPTION FACTOR BHLH90
Phvul.011G077100	11.4134	2.81776	0.246882	-2.0181	0.00119252	PTHR32077:SF7 - FASCICLIN-LIKE ARABINOGALACTAN PROTEIN 11
Phvul.006G166000	10.1852	2.51029	0.246464	-2.02054	0.00119252	NA_SP
Phvul.006G194900	10.847	2.66033	0.24526	-2.02762	0.00119252	K03809 - NAD(P)H dehydrogenase (quinone) (wrbA)
Phvul.004G023200	2.15469	0.52459	0.243464	-2.03822	0.00307701	PTHR11200//PTHR11200:SF168 - INOSITOL 5-PHOSPHATASE // SUBFAMILY NOT NAMED
Phvul.011G084300	9.20743	2.21863	0.240961	-2.05313	0.00119252	K01904 - 4-coumarate--CoA ligase (4CL)
Phvul.004G113000	2.68079	0.645285	0.240707	-2.05465	0.0150711	1.1.1.330 - Very-long-chain 3-oxoacyl-CoA reductase / Very-long-chain beta-ketoacyl-CoA reductase
Phvul.005G088400	2.81842	0.678037	0.240573	-2.05545	0.00395223	K03883 - NADH-ubiquinone oxidoreductase chain 5 (ND5)
Phvul.005G104600	56.2812	13.4463	0.238913	-2.06545	0.00119252	PTHR31692:SF5 - EXPANSIN-B1-RELATED
Phvul.010G135900	1.1804	0.278109	0.235606	-2.08555	0.00307701	K15718 - linoleate 9S-lipoxygenase (LOX1_5)
Phvul.010G099700	4.37696	1.02917	0.235134	-2.08845	0.00119252	PTHR15486:SF27 - GLYCEROL-3-PHOSPHATE 2-O-ACYLTRANSFERASE 4-RELATED
Phvul.005G088636	8.68069	2.03588	0.23453	-2.09216	0.00119252	NA_SP
Phvul.008G001100	4.8324	1.12485	0.232773	-2.10301	0.00119252	PF03083//PF04193 - Sugar efflux transporter for intercellular exchange (MtN3_slv) // PQ loop repeat (PQ-loop)
Phvul.006G159000	4.21626	0.976629	0.231634	-2.11008	0.00119252	NA_SP
Phvul.003G025000	1.67051	0.386545	0.231393	-2.11158	0.0474738	PF04759 - Protein of unknown function, DUF617 (DUF617)
Phvul.009G203200	3.50264	0.806009	0.230115	-2.11957	0.00119252	PF04833 - COBRA-like protein (COBRA)
Phvul.008G259700	3.32644	0.760903	0.228744	-2.12819	0.00119252	Mitogen-activated protein kinase kinase kinase
Phvul.011G074600	5.7939	1.32376	0.228475	-2.1299	0.00119252	PTHR32077:SF7 - FASCICLIN-LIKE ARABINOGALACTAN PROTEIN 11
Phvul.002G316500	1.03161	0.235336	0.228125	-2.13211	0.0316291	No apical meristem (NAM) protein
Phvul.003G067400	98.9963	22.4216	0.226489	-2.14249	0.00119252	NA_SP
Phvul.L001754	118.406	26.5616	0.224326	-2.15633	0.00119252	PTHR32077:SF7 - FASCICLIN-LIKE ARABINOGALACTAN PROTEIN 11
Phvul.003G274800	1.5018	0.333405	0.222004	-2.17135	0.00119252	PTHR24351:SF81 - PHOTOTROPIN-2
Phvul.007G069800	3.38469	0.74909	0.221317	-2.17581	0.00119252	PTHR33836:SF1 - ARM REPEAT SUPERFAMILY PROTEIN-RELATED
Phvul.002G180032	64.391	14.0378	0.218009	-2.19754	0.00119252	PF04043 - Plant invertase/pectin methylesterase inhibitor (PMEI)
Phvul.010G061500	4.68475	1.00888	0.215354	-2.21522	0.00119252	PF07107 - Wound-induced protein WI12 (WI12)
Phvul.001G075400	84.9801	18.1879	0.214025	-2.22415	0.00119252	PTHR13832//PTHR13832:SF326 - PROTEIN PHOSPHATASE 2C // SUBFAMILY NOT NAMED
Phvul.001G218700	4.4207	0.942585	0.213221	-2.22958	0.00994464	PTHR31734:SF15 - AUXIN-RESPONSIVE PROTEIN IAA20-RELATED
Phvul.001G258900	20.9938	4.45944	0.212417	-2.23503	0.00119252	PF06522 - NADH-ubiquinone reductase complex 1 MLRQ subunit (B12D)
Phvul.009G090224	817.65	173.477	0.212165	-2.23673	0.00119252	NS_SP
Phvul.010G146400	7.33267	1.55505	0.212071	-2.23738	0.00119252	NA_SP
Phvul.005G027032	41.0444	8.69653	0.211881	-2.23867	0.00119252	NA_SP
Phvul.002G266800	3.4375	0.728284	0.211864	-2.23879	0.00119252	PTHR11132//PTHR11132:SF73 - SOLUTE CARRIER FAMILY 35 // SUBFAMILY NOT NAMED
Phvul.007G174100	1.92402	0.393539	0.20454	-2.28955	0.00119252	PTHR11814:SF60 - SULFATE TRANSPORTER 3.1-RELATED
Phvul.005G088454	241.819	49.2384	0.203617	-2.29607	0.00119252	K02128 - F-type H+-transporting ATPase subunit c (ATPeF0C, ATP5G, ATP9)
Phvul.007G211800	2.70615	0.541693	0.200171	-2.3207	0.00216493	PTHR10641:SF494 - TRANSCRIPTION FACTOR MYB108
Phvul.001G064100	1.54183	0.304985	0.197807	-2.33784	0.0106059	1.14.19.2 - Stearoyl-[acyl-carrier-protein] 9-desaturase / Stearyl-ACP desaturase
Phvul.002G200600	1.4364	0.282005	0.196328	-2.34866	0.0126296	1.3.3.8 - Tetrahydroberberine oxidase / THB oxidase
Phvul.003G106302	3.80289	0.744146	0.195679	-2.35344	0.0239487	NA_SP
Phvul.011G077000	6.81764	1.32533	0.194397	-2.36292	0.00119252	PTHR32077:SF7 - FASCICLIN-LIKE ARABINOGALACTAN PROTEIN 11
Phvul.003G020700	5.54633	1.04858	0.189058	-2.4031	0.00119252	1.11.2.3 - Plant seed peroxygenase / Soybean peroxygenase
Phvul.007G265300	2.17298	0.409404	0.188407	-2.40808	0.00119252	PTHR19241//PTHR19241:SF286 - ATP-BINDING CASSETTE TRANSPORTER // SUBFAMILY NOT NAMED
Phvul.005G032600	2.73056	0.514156	0.188297	-2.40892	0.0210327	PTHR21495:SF59 - DIRIGENT PROTEIN 20-RELATED
Phvul.007G225200	19.1288	3.60187	0.188296	-2.40893	0.00119252	PTHR23241:SF11 - LATE EMBRYOGENESIS ABUNDANT PROTEIN (ATECP63)-RELATED
Phvul.002G082100	3.51849	0.655283	0.18624	-2.42477	0.00216493	PTHR31388:SF9 - PEROXIDASE 11
Phvul.011G157000	4.29188	0.787615	0.183513	-2.44605	0.00307701	PTHR32295:SF9 - IQ-DOMAIN 9 PROTEIN
Phvul.010G015400	7.3432	1.3471	0.183449	-2.44656	0.00119252	1.2.1.41//2.7.2.11 - Glutamate-5-semialdehyde dehydrogenase / Glutamyl-gamma-semialdehyde dehydrogenase // Glutamate 5-kinase / Gamma-glutamyl kinase
Phvul.009G028400	18.1767	3.32147	0.182732	-2.4522	0.00119252	PTHR11814:SF61 - SULFATE TRANSPORTER 2.1-RELATED
Phvul.003G237400	48.0426	8.56847	0.178352	-2.4872	0.00119252	PTHR33922:SF4 - EXPRESSED PROTEIN
Phvul.003G120900	5.35879	0.941054	0.175609	-2.50956	0.00307701	PF04398 - Protein of unknown function, DUF538 (DUF538)
Phvul.011G127500	1.44407	0.252537	0.174879	-2.51557	0.0161866	KOG0716 - Molecular chaperone (DnaJ superfamily)
Phvul.004G144400	4.1586	0.715383	0.172025	-2.53931	0.00119252	PTHR11999:SF113 - GLUTAMATE DECARBOXYLASE 2
Phvul.009G019400	20.0497	3.42235	0.170693	-2.55052	0.00119252	PTHR13871//PTHR13871:SF48 - THIOREDOXIN // SUBFAMILY NOT NAMED
Phvul.002G203800	188.236	31.879	0.169357	-2.56187	0.00119252	NA_SP
Phvul.003G148900	0.919438	0.155477	0.1691	-2.56405	0.00854284	1.1.1.267//2.2.1.7 - 1-deoxy-D-xylulose-5-phosphate reductoisomerase / DXP-reductoisomerase // 1-deoxy-D-xylulose-5-phosphate synthase / DXP-synthase
Phvul.003G153100	1.91557	0.323646	0.168955	-2.56529	0.00474738	K09285 - AP2-like factor, ANT lineage (OVM, ANT
Phvul.007G027100	0.99925	0.166541	0.166666	-2.58497	0.00474738	PTHR31561:SF5 - 3-KETOACYL-COA SYNTHASE 5-RELATED
Phvul.007G008200	1.81756	0.302768	0.166579	-2.58572	0.00119252	PTHR19241:SF180 - ABC TRANSPORTER G FAMILY MEMBER 1-RELATED
Phvul.002G240200	4.06975	0.66812	0.164167	-2.60676	0.00119252	PTHR13301:SF31 - CELLULOSE SYNTHASE A CATALYTIC SUBUNIT 8 [UDP-FORMING]
Phvul.002G319400	5.86777	0.963168	0.164145	-2.60695	0.0132304	PF00646 - F-box domain (F-box)
Phvul.006G154100	164.609	26.7132	0.162283	-2.62342	0.00119252	NA_SP
Phvul.008G179700	244.87	39.436	0.161049	-2.63443	0.00119252	NA_SP
Phvul.001G000800	5.14979	0.819864	0.159203	-2.65106	0.00119252	PTHR22893//PTHR22893:SF62 - NADH OXIDOREDUCTASE-RELATED // SUBFAMILY NOT NAMED
Phvul.011G005200	2.37644	0.371585	0.156362	-2.67704	0.00474738	PTHR31080:SF19 - PLANT INVERTASE/PECTIN METHYLESTERASE INHIBITOR SUPERFAMILY PROTEIN
Phvul.005G002600	9.76947	1.52084	0.155673	-2.68341	0.00119252	PTHR12526:SF358 - SUCROSE-PHOSPHATE SYNTHASE 4-RELATED
Phvul.006G022150	1.64924	0.248887	0.15091	-2.72824	0.0313145	PTHR12549 - JMJC DOMAIN-CONTAINING HISTONE DEMETHYLATION PROTEIN
Phvul.002G295500	6.44377	0.970808	0.150658	-2.73065	0.00119252	PTHR11122//PTHR11122:SF25 - APOSPORY-ASSOCIATED PROTEIN C-RELATED // SUBFAMILY NOT NAMED
Phvul.003G164000	57.1728	8.58171	0.150101	-2.73599	0.00119252	PTHR11654:SF85 - PROTEIN NRT1/ PTR FAMILY 6.2
Phvul.008G042500	1.04095	0.155122	0.14902	-2.74643	0.0374839	PF03007//PF06974 - Wax ester synthase-like Acyl-CoA acyltransferase domain (WES_acyltransf) // Protein of unknown function (DUF1298) (DUF1298)
Phvul.009G018200	1.92377	0.284316	0.147791	-2.75837	0.00704558	PTHR22835:SF184 - GDSL ESTERASE/LIPASE EXL1-RELATED
Phvul.009G205200	3.2461	0.464652	0.143142	-2.80448	0.00119252	PTHR13301:SF63 - CELLULOSE SYNTHASE A CATALYTIC SUBUNIT 4 [UDP-FORMING
Phvul.009G194100	25.7743	3.60504	0.13987	-2.83785	0.00119252	K03098 - apolipoprotein D and lipocalin family protein (APOD)
Phvul.009G164800	1.37142	0.19156	0.13968	-2.83981	0.0250762	K10781 - fatty acyl-ACP thioesterase B (FATB)
Phvul.004G056400	10.0295	1.39387	0.138977	-2.84709	0.00119252	PTHR33595:SF3 - EMB
Phvul.005G087600	2.21249	0.298622	0.134971	-2.88928	0.0161866	NA_SP
Phvul.004G068800	6.0855	0.804708	0.132234	-2.91884	0.0346981	PF14368 - Probable lipid transfer (LTP_2)
Phvul.003G096700	512.872	67.269	0.131161	-2.93059	0.00119252	PTHR33509:SF5 - LATE EMBRYOGENESIS ABUNDANT 3 (LEA3) FAMILY PROTEIN
Phvul.009G027600	46.8914	6.12974	0.130722	-2.93542	0.00119252	PTHR22814:SF84 - HEAVY-METAL-ASSOCIATED DOMAIN-CONTAINING PROTEIN
Phvul.005G088618	2.63003	0.339866	0.129225	-2.95204	0.011265	NA_SP
Phvul.007G231800	4.84242	0.622978	0.12865	-2.95847	0.00119252	PTHR10641:SF456 - MYB DOMAIN PROTEIN 79
Phvul.007G058500	5.50027	0.707115	0.12856	-2.95948	0.00119252	PTHR33044:SF23 - BIFUNCTIONAL INHIBITOR/LIPID-TRANSFER PROTEIN/SEED STORAGE 2S ALBUMIN SUPERFAMILY PROTEIN-RELATED
Phvul.006G202900	19.7443	2.49837	0.126536	-2.98238	0.00119252	NA_SP
Phvul.008G058000	3.4835	0.432325	0.124107	-3.01035	0.0491414	PTHR31221:SF7 - WRKY TRANSCRIPTION FACTOR 24-RELATED
Phvul.006G130100	2.21031	0.263884	0.119388	-3.06628	0.0138572	PTHR31388:SF22 - PEROXIDASE 22-RELATED
Phvul.010G035850	20.0693	2.38237	0.118707	-3.07452	0.0138572	NA_SP
Phvul.005G087400	3.18832	0.377323	0.118345	-3.07892	0.00119252	PTHR10641//PTHR10641:SF567 - MYB-LIKE DNA-BINDING PROTEIN MYB // SUBFAMILY NOT NAMED
Phvul.005G154200	47.0298	5.56399	0.118308	-3.07938	0.00119252	NA_SP
Phvul.011G115230	10.5649	1.20231	0.113802	-3.13539	0.00119252	PTHR10641//PTHR10641:SF574 - MYB-LIKE DNA-BINDING PROTEIN MYB // SUBFAMILY NOT NAMED
Phvul.011G029000	2.12913	0.238777	0.112148	-3.15653	0.00119252	K15402 - fatty acid omega-hydroxylase (CYP86B1)
Phvul.002G040900	3.41747	0.363103	0.106249	-3.23448	0.00119252	PTHR10641//PTHR10641:SF671 - MYB-LIKE DNA-BINDING PROTEIN MYB // SUBFAMILY NOT NAMED
Phvul.008G123600	5.25413	0.550456	0.104766	-3.25475	0.00216493	PTHR36326:SF1 - PROTEIN MALE STERILE 5
Phvul.002G272600	3.97141	0.411975	0.103735	-3.26902	0.00119252	NA
Phvul.007G135500	16.3044	1.68719	0.103481	-3.27257	0.00119252	PTHR33021:SF70 - UCLACYANIN I-RELATED
Phvul.005G135955	2.46061	0.241168	0.0980115	-3.35091	0.0250762	PTHR32077:SF7 - FASCICLIN-LIKE ARABINOGALACTAN PROTEIN 11
Phvul.011G125800	8.46643	0.814381	0.0961894	-3.37798	0.0307938	PTHR36816:SF1 - ATP SYNTHASE PROTEIN YMF19
Phvul.008G192000	3.29517	0.313495	0.0951377	-3.39384	0.00119252	PTHR15486:SF25 - GLYCEROL-3-PHOSPHATE ACYLTRANSFERASE 5-RELATED
Phvul.L006401	4.41615	0.418602	0.0947889	-3.39914	0.00119252	PTHR31852:SF48 - LATE EMBRYOGENESIS ABUNDANT HYDROXYPROLINE-RICH GLYCOPROTEIN
Phvul.007G058600	8.79928	0.796435	0.0905114	-3.46576	0.00119252	PTHR33044:SF13 - BIFUNCTIONAL INHIBITOR/LIPID-TRANSFER PROTEIN/SEED STORAGE 2S ALBUMIN-LIKE PROTEIN-RELATED
Phvul.001G153600	6.08829	0.544529	0.0894387	-3.48295	0.00307701	PF14368 - Probable lipid transfer (LTP_2)
Phvul.010G099900	1.70991	0.144208	0.0843366	-3.5677	0.0216425	PTHR24296:SF9 - CYTOCHROME P450 86A2-RELATED
Phvul.007G046400	4.05056	0.337197	0.083247	-3.58646	0.00119252	PTHR11119:SF51 - NUCLEOBASE-ASCORBATE TRANSPORTER 4
Phvul.003G189500	4.47331	0.37204	0.0831688	-3.58781	0.00119252	PTHR22835//PTHR22835:SF267 - ZINC FINGER FYVE DOMAIN CONTAINING PROTEIN // SUBFAMILY NOT NAMED
Phvul.006G202800	11.7775	0.978249	0.0830608	-3.58969	0.00119252	NA_SP
Phvul.006G065000	4.11358	0.337673	0.0820874	-3.6067	0.00119252	1.14.14.1//1.14.15.3 - Unspecific monooxygenase / Xenobiotic monooxygenase // Alkane 1-monooxygenase / Omega-hydroxylase
Phvul.004G119300	6.30892	0.506438	0.0802733	-3.63893	0.00119252	KOG0156 - Cytochrome P450 CYP2 subfamily
Phvul.009G218200	13.1934	1.05768	0.0801674	-3.64084	0.00119252	PTHR11615//PTHR11615:SF120 - NITRATE, FROMATE, IRON DEHYDROGENASE // SUBFAMILY NOT NAMED
Phvul.006G191200	9.60997	0.761038	0.0791925	-3.65849	0.00119252	PTHR33098:SF10 - T28P6.11 PROTEIN
Phvul.006G203000	89.9121	6.53352	0.0726656	-3.78258	0.00119252	NA_SP
Phvul.003G248600	9.12939	0.603371	0.0660911	-3.9194	0.00119252	PTHR22835//PTHR22835:SF147 - ZINC FINGER FYVE DOMAIN CONTAINING PROTEIN // SUBFAMILY NOT NAMED
Phvul.002G211900	41.5411	2.70911	0.0652152	-3.93865	0.00119252	NA_SP
Phvul.009G186800	6.4745	0.407562	0.0629488	-3.98968	0.00119252	PTHR22835//PTHR22835:SF267 - ZINC FINGER FYVE DOMAIN CONTAINING PROTEIN // SUBFAMILY NOT NAMED
Phvul.007G103700	4.19171	0.260915	0.0622455	-4.00588	0.00119252	PTHR22835//PTHR22835:SF224 - ZINC FINGER FYVE DOMAIN CONTAINING PROTEIN // SUBFAMILY NOT NAMED
Phvul.011G043800	140.426	8.10069	0.0576865	-4.11562	0.00119252	NA_SP
Phvul.007G035600	17.2987	0.983053	0.0568281	-4.13725	0.0470368	NA_SP
Phvul.003G010600	6.75087	0.342894	0.0507926	-4.29924	0.00119252	PTHR24096:SF134 - LONG CHAIN ACYL-COA SYNTHETASE 2
Phvul.001G031400	22.3576	1.09774	0.0490992	-4.34816	0.00119252	PTHR33088:SF9 - HYDROXYPROLINE-RICH GLYCOPROTEIN FAMILY PROTEIN
Phvul.011G119700	9.46412	0.446098	0.0471357	-4.40703	0.00119252	PF03007//PF06974 - Wax ester synthase-like Acyl-CoA acyltransferase domain (WES_acyltransf) // Protein of unknown
Phvul.001G142000	11.8856	0.524201	0.0441039	-4.50295	0.00119252	PTHR33493:SF2 - LATE EMBRYOGENESIS ABUNDANT PROTEIN 4-5
Phvul.007G173500	20.6625	0.833147	0.0403217	-4.6323	0.00119252	PTHR33044:SF23 - BIFUNCTIONAL INHIBITOR/LIPID-TRANSFER PROTEIN/SEED STORAGE 2S ALBUMIN SUPERFAMILY
Phvul.007G036400	165.458	5.56181	0.0336146	-4.89477	0.00395223	NA_SP
Phvul.002G090544	12.1108	UD	UD	UD	0.00119252	K02708 - photosystem II cytochrome b559 subunit beta (psbF)
Phvul.005G088500	4.10609	UD	UD	UD	0.00395223	NA_SP
Phvul.006G197400	21.4559	UD	UD	UD	0.00119252	PTHR10334//PTHR10334:SF231 - CYSTEINE-RICH SECRETORY PROTEIN-RELATED // SUBFAMILY NOT NAMED
Phvul.007G200600	3.28627	UD	UD	UD	0.00119252	NA_SP
Phvul.008G096200	1.46569	UD	UD	UD	0.011973	K00207 - dihydropyrimidine dehydrogenase (NADP+) (DPYD)
UD:undetermined; NA_SP: No annotation
