# Supplementary material for: Phosphate Deficiency Negatively Affects Early Steps of the Symbiosis between Common Bean and Rhizobia
Source: Preprints.org preprint supplement (doi:10.20944/preprints201809.0207.v1), 2018-09-12
Supplement: Supplementary file 2 [file TableS1.xlsx]

## Sheet: Sheet1
Table S1: Primer sequences used for qRT-PCR analysis
Primer Name	Primer Sequence	Gene	Description
F_PvActin
R_PvActin
F_PvNSP2	GACGGTTATCGGGTAGAGGAG	Phvul.009G122700	PvNSP2
R_PvNSP2	CGGAGGAAGAAGAAGTCCAAA	Phvul.009G122700	PvNSP2
F_PvNIN	GGGAGAAGAGGCGTACGAAG	Phvul.009G115800	PvNIN
R_PvNIN	GTTGTGGGACACACTCCGA T	Phvul.009G115800	PvNIN
F_PvFLOT2	GGAACCCTGTCAGACAAAACA	Phvul.009G090700	PvFLOT2
R_PvFLOT2	TTCACGAATCCAAAACAACC	Phvul.009G090700	PvFLOT2
F_PvRIC1	GCTTATTGTATGCTTCCACACTGC	Phvul.005G096900	PvRIC1
R_PvRIC1	TGAACAAGATGCTCAAAGTGGG	Phvul.005G096900	PvRIC1
F_PvRIC2	CTCTCCATGCCCACACTCC	Phvul.011g135901	PvRIC2
R_PvRIC2	TCATGTCCACGTTTTGCTAGG	Phvul.011g135901	PvRIC2
F_PvPYL5	TTCATGCATGGATGGGTAGAT	Phvul.001G246300	ABSCISIC ACID RECEPTOR PYL5
R_PvPYL5	ACGGGGAAGAAATCTAGCGTA	Phvul.001G246300	ABSCISIC ACID RECEPTOR PYL5
F_PvEF	GTCTGTGTTGAAAAGGCTTGG	Phvul.009G130600	EF-HAND CALCIUM-BINDING DOMAIN CONTAINING PROTEIN
R_PvEF	GAATGATGATCAGGCTTTGGA	Phvul.009G130600	EF-HAND CALCIUM-BINDING DOMAIN CONTAINING PROTEIN
F_PvIKB1	TGTTGAGGCGAGGACTAACAA	Phvul.001G113900	Pv IKB-1
R_PvIKB1	AAGCTCCCACGAATCTCTCTC	Phvul.001G113900	Pv IKB-1
F_PvBHLH	CTGCAGAAAACCACAGCAAGT	Phvul.008G184800	TRANSCRIPTION FACTOR BHLH61-RELATED
R_PvBHLH	CCATGATTAATAGGCATCTCCA	Phvul.008G184800	TRANSCRIPTION FACTOR BHLH61-RELATED
F_PvLRRPk	TTGAGAACATGTTGCAGTTGG	Phvul.006G133400	LEUCINE-RICH REPEAT PROTEIN KINASE-LIKE PROTEIN
R_PvLRRPk	AATCTACGGACGTGGAAGGAC	Phvul.006G133400	LEUCINE-RICH REPEAT PROTEIN KINASE-LIKE PROTEIN
F_PvCR	CTGGATGGCCTCAGAGACAC	Phvul.007G049300	CYSTEINE-RICH REPEAT SECRETORY PROTEIN 1-RELATED
R_PvCR	GATGGACTGGACCAAGCAGT	Phvul.007G049300	CYSTEINE-RICH REPEAT SECRETORY PROTEIN 1-RELATED
F_PvClathrin	ACCAACCATATCAGCATCAGC	Phvul.003G022000	CLATHRIN ASSEMBLY PROTEIN
R_PvClatrin	TGTTCCTATATCATGCCAGTGC	Phvul.003G022000	CLATHRIN ASSEMBLY PROTEIN
F_PvERN	TGGAGCTGTCTTTGATCGTTT	Phvul.001G111800	ETHYLENE-RESPONSIVE TRANSCRIPTION FACTOR CRF3-RELATED
R_ERN	CATGTACTCTTGCACCCCATT	Phvul.001G111800	ETHYLENE-RESPONSIVE TRANSCRIPTION FACTOR CRF3-RELATED
F_RSTPk	TGTTCGTGATTGGATTGTGAAG	Phvul.009G020600	RECEPTOR-INTERACTING SERINE/THREONINE-PROTEIN KINASE 1
R_RSTPk	AGCTCACATGTGGATCGTCTT	Phvul.009G020600	RECEPTOR-INTERACTING SERINE/THREONINE-PROTEIN KINASE 1
F_RBOHf	TATATACCGGCCAGCAAGATG	Phvul.002G160700	RESPIRATORY BURST OXIDASE HOMOLOG PROTEIN F-RELATED
R_RBOHf	CCTATGCCTTGCTCCTTAACC	Phvul.002G160700	RESPIRATORY BURST OXIDASE HOMOLOG PROTEIN F-RELATED
F_PvIAAres	TCAACTTTGTCTGCCAAAACC	Phvul.003G167700	auxin-responsive protein IAA (IAA)
R_PvIAAres	CCAACCAACTACAGTGAGAAACT	Phvul.003G167700	auxin-responsive protein IAA (IAA)
F_PvOligoTrans	GGTTGGATTGCAAAGGATGTA	Phvul.001G237500	OLIGOPEPTIDE TRANSPORTER-RELATED
R_PvOligoTrans	ATCATGGCAGTGTTTCCACTC	Phvul.001G237500	OLIGOPEPTIDE TRANSPORTER-RELATED
F_PvENOD1	GTGAACGATTTTCCTTTGATGG	Phvul.003G155600	EARLY NODULIN-LIKE PROTEIN 1-RELATED
R_PvENOD1	TGGCAACAAAAATGACTTGG	Phvul.003G155600	EARLY NODULIN-LIKE PROTEIN 1-RELATED
F_PvTubulin	ATGTTCGACAAGCTTGACTCG	Phvul.002G329800	TUBULIN BETA-4 CHAIN-RELATED
R_PvTubulin	TGATGAGATGCTGCTGTATTGA	Phvul.002G329800	TUBULIN BETA-4 CHAIN-RELATED
F_PvChitinase	TGCATAAATGAGAAAGGAGGAG	Phvul.003G158800	PvChitinase
R_PvChitinase	TTGGTGAATGAAGGCATTGTC	Phvul.003G158800	PvChitinase
F_Pv10G12	TTGGGACTCTTATCATCTCACAG	Phvul.010G124800	GDSL ESTERASE/LIPASE 5-RELATED
R_Pv10G12	GCAAAAGCAATGAAGCATGA	Phvul.010G124800	GDSL ESTERASE/LIPASE 5-RELATED
F_Pv011G09	ATGTTAGTGGGCATGACCTTG	Phvul.011G097200	borneol dehydrogenase
R_Pv011G09	CTTTGTGCCCATTACAACCAC	Phvul.011G097200	borneol dehydrogenase
F_Pv001G04	GTTGACGTCAGAATTGGCTTG	Phvul.001G046200	Omega-hydroxypalmitate O-feruloyl transferase
R_Pv001G04	CTTCCACGAGACACCATGAAT	Phvul.001G046200	Omega-hydroxypalmitate O-feruloyl transferase
F_Pv006G08	TGGTGGTGTTCTTCTTCCTTG	Phvul.006G087800	F-box domain
R_Pv006G08	TGAGCTGGGAATCACATTTCT	Phvul.006G087800	F-box domain
F_Pv004G06	AAGGGAATCTGCATAGCGAAT	Phvul.004G068900	ETHYLENE-RESPONSIVE TRANSCRIPTION FACTOR LEP
R_Pv004G06	CCCAAGTACACATCCAAGCAT	Phvul.004G068900	ETHYLENE-RESPONSIVE TRANSCRIPTION FACTOR LEP
F_Pv009G18	TCCTTTGAAACATGACCAAGAG	Phvul.009G180700	Threonine-specific protein kinase
R_Pv009G18	CCTTGTGTTCTCACCGAAATG	Phvul.009G180700	Threonine-specific protein kinase
F_Pv009G182	ACGCCACTCAGATTCCCTAAC	Phvul.009G182900	FORMIN-LIKE PROTEIN 4-RELATED
R_Pv009G182	GACAAGGGAAACACCAGTGAA	Phvul.009G182900	FORMIN-LIKE PROTEIN 4-RELATED
F_Pv011G17	AAGCGAAATACGTGTGGAGTG	Phvul.011G179600	CASPASE REGULATOR
R_Pv011G17	CCCACCAAACATGAGAACAAA	Phvul.011G179600	CASPASE REGULATOR
F_Pv001G03	CCTGAATTGCCTAAATTCGAC	Phvul.001G031400	HYDROXYPROLINE-RICH GLYCOPROTEIN FAMILY PROTEIN
R_Pv001G03	GAAAGTTCAGGAACCTTAAGCA	Phvul.001G031400	HYDROXYPROLINE-RICH GLYCOPROTEIN FAMILY PROTEIN
F_Pv003G24	CTTATCATCCAAGCGAAGCTG	Phvul.003G248600	ZINC FINGER FYVE DOMAIN CONTAINING PROTEIN
R_Pv003G24	GAGAGGTACGGAAAAGAAGAGAA	Phvul.003G248600	ZINC FINGER FYVE DOMAIN CONTAINING PROTEIN
