# Supplementary material for: Phosphate Deficiency Negatively Affects Early Steps of the Symbiosis between Common Bean and Rhizobia
Source: Preprints.org preprint supplement (doi:10.20944/preprints201809.0207.v1), 2018-09-12
Supplement: Supplementary file 4 [file TableS3.xlsx]

## Sheet: Sheet1
Table S3: Rhizobia-induced genes under low-phosphate conditions
Gene ID	FPKM_LP_Mock	RPKM_LP_Rhizobia	Fold-Change	Log2Fold-Change	q_value	Description
Phvul.001G237500	0	1.20774	ND	ND	0.00306166	PTHR11654//PTHR11654:SF128 - OLIGOPEPTIDE TRANSPORTER-RELATED // SUBFAMILY NOT NAMED
Phvul.002G211800	0	1.97426	ND	ND	0.0476017	NA_SP
Phvul.002G230500	0	0.976582	ND	ND	0.00306166	PF14111 - Domain of unknown function (DUF4283) (DUF4283)
Phvul.002G230600	0	6.18835	ND	ND	0.00306166	NA_SP
Phvul.002G319108	0	13.8135	ND	ND	0.00306166	PTHR15907:SF47 - PROTEIN PLANT CADMIUM RESISTANCE 11-RELATED
Phvul.003G155600	0	4.38575	ND	ND	0.00306166	PTHR33021:SF8 - EARLY NODULIN-LIKE PROTEIN 1-RELATED
Phvul.003G182700	0	0.992276	ND	ND	0.00306166	PTHR11945//PTHR11945:SF163 - MADS BOX PROTEIN // SUBFAMILY NOT NAMED
Phvul.004G090800	0	0.825528	ND	ND	0.00306166	1.11.1.7 - Peroxidase / Lactoperoxidase
Phvul.005G050500	0	1.65375	ND	ND	0.00306166	PTHR13683:SF298 - ASPARTIC PROTEINASE CDR1-RELATED
Phvul.005G092100	0	1.55024	ND	ND	0.00306166	NA_SP
Phvul.005G114300	0	1.39181	ND	ND	0.00306166	PF03168 - Late embryogenesis abundant protein (LEA_2)
Phvul.005G165300	0	2.80617	ND	ND	0.00306166	K05759 - profilin (PFN)
Phvul.006G032966	0	1.1967	ND	ND	0.0412438	NA_SP
Phvul.006G033032	0	2.86239	ND	ND	0.00306166	PTHR11742:SF44 - ALPHA-MANNOSIDASE I MNS5-RELATED
Phvul.006G074700	0	1.72128	ND	ND	0.00306166	PF07107 - Wound-induced protein WI12 (WI12)
Phvul.006G126200	0	12.8624	ND	ND	0.00306166	PF07883 - Cupin domain (Cupin_2)
Phvul.007G010500	0	1.22146	ND	ND	0.00306166	PF05056 - Protein of unknown function (DUF674) (DUF674)
Phvul.007G086900	0	1.5411	ND	ND	0.00306166	NA_SP
Phvul.007G125400	0	0.828786	ND	ND	0.00306166	NA_SP
Phvul.007G171466	0	0.993868	ND	ND	0.00306166	NA_SP
Phvul.008G088700	0	6.41	ND	ND	0.00306166	PTHR31087:SF11 - PROTEIN LURP-ONE-RELATED 1-RELATED
Phvul.008G116801	0	1.45602	ND	ND	0.00306166	K08081 - Tropinone reductase 1 (TR1)
Phvul.009G068600	0	1.96362	ND	ND	0.00306166	NA_SP
Phvul.009G203600	0	3.68341	ND	ND	0.00306166	PF00280 - Potato inhibitor I family (potato_inhibit)
Phvul.011G202000	0	1.07917	ND	ND	0.00306166	3.2.1.21 - Beta-glucosidase / Gentobiase
Phvul.L001601	0	1.04334	ND	ND	0.00306166	K06874 - zinc finger protein (K06874)
Phvul.004G090994	4.06248	233.609	57.504	5.84559	0.00306166	NA_SP
Phvul.005G045300	0.111023	5.33049	48.0125	5.58534	0.0246211	3.2.1.52 - Beta-N-acetylhexosaminidase / N-acetyl-beta-glucosaminidase
Phvul.002G329800	0.407826	18.5901	45.5834	5.51044	0.00306166	PTHR11588:SF97 - TUBULIN BETA-4 CHAIN-RELATED
Phvul.004G124100	0.227031	10.1675	44.7846	5.48493	0.00306166	2.7.10.2 - Non-specific protein-tyrosine kinase / Cytoplasmic protein tyrosine kinase
Phvul.008G218500	0.605748	25.1139	41.4593	5.37363	0.00306166	PTHR31388:SF24 - PEROXIDASE 52
Phvul.009G024301	1.96263	72.6935	37.0388	5.21097	0.00306166	PF10950 - Protein of unknown function (DUF2775) (DUF2775)
Phvul.004G106300	0.550534	18.4937	33.5923	5.07006	0.00306166	PTHR12064//PTHR12064:SF36 - ANCIENT CONSERVED DOMAIN PROTEIN-RELATED // SUBFAMILY NOT NAMED
Phvul.005G157800	0.165738	4.76611	28.7569	4.84583	0.00306166	PTHR31250:SF13 - CALMODULIN-BINDING PROTEIN
Phvul.007G113300	0.104531	2.79513	26.7397	4.74092	0.00779766	PF01565//PF08031 - FAD binding domain (FAD_binding_4) // Berberine and berberine like (BBE)
Phvul.011G022300	11.6449	279.517	24.0034	4.58516	0.00306166	1.1.1.195 - Cinnamyl-alcohol dehydrogenase / CAD
Phvul.002G205100	0.350006	8.02589	22.9307	4.51921	0.00306166	PTHR31851:SF6 - VACUOLAR IRON TRANSPORTER HOMOLOG 2.1
Phvul.010G124800	1.38258	30.3974	21.986	4.45851	0.00306166	PTHR22835:SF262 - GDSL ESTERASE/LIPASE 5-RELATED
Phvul.007G263950	0.179276	3.79525	21.1699	4.40394	0.0151885	NA_SP
Phvul.003G214100	2.01342	40.3623	20.0466	4.32529	0.00306166	PTHR10795//PTHR10795:SF369 - PROPROTEIN CONVERTASE SUBTILISIN/KEXIN // SUBFAMILY NOT NAMED
Phvul.011G060400	0.719524	9.15441	12.7229	3.66935	0.00306166	PTHR12483//PTHR12483:SF45 - SOLUTE CARRIER FAMILY 31 COPPER TRANSPORTERS // SUBFAMILY NOT NAMED
Phvul.005G173500	0.477636	6.03816	12.6418	3.66013	0.00306166	PTHR10209:SF95 - GIBBERELLIN 3-BETA-DIOXYGENASE 1-RELATED
Phvul.002G304400	1.84379	22.4647	12.184	3.60691	0.00306166	PTHR12374//PTHR12374:SF19 - TRANSCRIPTIONAL ADAPTOR 2 ADA2 -RELATED // SUBFAMILY NOT NAMED
Phvul.011G139800	0.262652	3.09407	11.7801	3.55828	0.00306166	K05658 - ATP-binding cassette, subfamily B (MDR/TAP), member 1 (ABCB1)
Phvul.003G234100	0.717659	8.44927	11.7734	3.55746	0.00306166	PF14009 - Domain of unknown function (DUF4228) (DUF4228)
Phvul.010G126200	0.115717	1.3475	11.6448	3.54162	0.00306166	PF09818 - Predicted ATPase of the ABC class (ABC_ATPase)
Phvul.002G064232	144.349	1669.65	11.5668	3.53192	0.00306166	NA_SP
Phvul.005G111800	0.245697	2.74955	11.1908	3.48424	0.00306166	PF03514 - GRAS domain family (GRAS)
Phvul.003G158800	0.821404	8.70206	10.5941	3.40519	0.00306166	PTHR11177//PTHR11177:SF208 - CHITINASE // SUBFAMILY NOT NAMED
Phvul.002G064166	516.758	5457.23	10.5605	3.40061	0.00306166	NA_SP
Phvul.005G117300	0.88426	9.24403	10.454	3.38598	0.00306166	PTHR33264:SF5 - EXPRESSED PROTEIN-RELATED
Phvul.008G009500	3.6394	37.6271	10.3388	3.37	0.00306166	NA_SP
Phvul.007G185701	0.543407	5.54143	10.1976	3.35016	0.0492336	3.5.4.33 - tRNA(adenine(34)) deaminase
Phvul.011G097200	0.254706	2.56941	10.0877	3.33453	0.0449305	1.1.1.198 - (+)-borneol dehydrogenase
Phvul.011G101500	0.363816	3.57079	9.81482	3.29496	0.00306166	PTHR13301:SF53 - CELLULOSE SYNTHASE-LIKE PROTEIN B1-RELATED
Phvul.002G025300	0.171222	1.56386	9.13352	3.19117	0.0374075	1.14.13.121 - Premnaspirodiene oxygenase / Hyoscymus muticus premnaspirodiene oxygenase
Phvul.003G149200	6.46796	56.5648	8.74538	3.12852	0.00306166	2.7.10.2 - Non-specific protein-tyrosine kinase / Cytoplasmic protein tyrosine kinase
Phvul.006G126400	0.381072	2.98599	7.83576	2.97007	0.0456544	2.4.1.10 - Levansucrase / Sucrose 6-fructosyltransferase
Phvul.003G209101	0.201996	1.52875	7.56822	2.91995	0.0119964	2.3.3.9 - Malate synthase / Malic-condensing enzyme
Phvul.002G154600	0.117698	0.88818	7.54626	2.91576	0.0476017	PTHR11206:SF127 - MATE EFFLUX FAMILY PROTEIN
Phvul.004G155500	0.499138	3.66946	7.35159	2.87806	0.00306166	PTHR27009:SF21 - PR5-LIKE RECEPTOR KINASE-RELATED
Phvul.011G032800	1.09927	7.87199	7.16111	2.84018	0.00306166	PTHR10209//PTHR10209:SF177 - OXIDOREDUCTASE, 2OG-FE II OXYGENASE FAMILY PROTEIN // SUBFAMILY NOT NAMED
Phvul.001G261500	11.9153	83.6752	7.0225	2.81199	0.00306166	1.14.13.21 - Flavonoid 3'-monooxygenase / Flavonoid 3'-hydroxylase
Phvul.007G101600	0.125791	0.863808	6.86701	2.77969	0.0485398	PTHR27000:SF18 - LEUCINE-RICH REPEAT-CONTAINING PROTEIN
Phvul.010G022400	0.256565	1.72536	6.72485	2.74951	0.0151885	KOG0156 - Cytochrome P450 CYP2 subfamily
Phvul.005G052500	2.55751	16.7479	6.54852	2.71117	0.00306166	2.5.1.43 - Nicotianamine synthase
Phvul.002G080100	2.72169	17.4403	6.40789	2.67985	0.00306166	PTHR11260:SF193 - GLUTATHIONE S-TRANSFERASE U11-RELATED
Phvul.008G164100	0.796462	5.08654	6.38642	2.67501	0.00306166	PF00892 - EamA-like transporter family (EamA)
Phvul.008G184800	3.07907	19.536	6.34477	2.66557	0.00306166	PTHR31945:SF6 - TRANSCRIPTION FACTOR BHLH61-RELATED
Phvul.001G046200	0.217247	1.37096	6.3106	2.65778	0.0151885	2.3.1.188 - Omega-hydroxypalmitate O-feruloyl transferase / O-hydroxycinnamoyltransferase
Phvul.001G228500	1.41787	8.36177	5.89742	2.56008	0.00306166	PTHR22849:SF43 - U-BOX DOMAIN-CONTAINING PROTEIN 54-RELATED
Phvul.010G067746	1.31289	7.60134	5.78978	2.53351	0.00306166	PTHR13832:SF283 - PROTEIN PHOSPHATASE 2C-LIKE PROTEIN 44-RELATED
Phvul.002G171100	0.871392	5.0392	5.78293	2.5318	0.00306166	PTHR10759//PTHR10759:SF9 - 60S RIBOSOMAL PROTEIN L34 // SUBFAMILY NOT NAMED
Phvul.008G220300	1.38691	8.01406	5.77836	2.53066	0.00306166	PTHR11709:SF22 - LACCASE-12-RELATED
Phvul.008G086900	1.70758	9.68502	5.67178	2.5038	0.00306166	1.11.1.7 - Peroxidase / Lactoperoxidase
Phvul.006G030200	0.524042	2.93353	5.59789	2.48489	0.019962	PF14009 - Domain of unknown function (DUF4228) (DUF4228)
Phvul.007G035500	0.316023	1.72827	5.46881	2.45123	0.0316857	PF14009 - Domain of unknown function (DUF4228) (DUF4228)
Phvul.006G117300	3.52389	19.0086	5.39421	2.43141	0.00306166	2.5.1.43 - Nicotianamine synthase
Phvul.001G039100	3.61619	19.239	5.32024	2.41149	0.00306166	K18787 - thermospermine synthase (ACL5)
Phvul.009G073900	3.14321	16.0857	5.1176	2.35547	0.00306166	NA_SP
Phvul.003G054700	2.09216	10.4244	4.9826	2.3169	0.00306166	PF14009 - Domain of unknown function (DUF4228) (DUF4228)
Phvul.001G135400	0.643007	3.16699	4.92528	2.3002	0.0151885	NA_SP
Phvul.002G123900	2.35342	11.4814	4.8786	2.28647	0.00306166	PTHR21562:SF4 - PECTINACETYLESTERASE FAMILY PROTEIN
Phvul.007G145600	0.157543	0.766473	4.86517	2.28249	0.00306166	PTHR13140//PTHR13140:SF480 - MYOSIN // SUBFAMILY NOT NAMED
Phvul.004G068200	0.324438	1.55816	4.80264	2.26383	0.0169169	1.14.13.89 - Isoflavone 2'-hydroxylase / Isoflavone 2'-monooxygenase
Phvul.008G070800	0.274504	1.27177	4.63297	2.21194	0.00306166	PTHR23155//PTHR23155:SF590 - LEUCINE-RICH REPEAT-CONTAINING PROTEIN // SUBFAMILY NOT NAMED
Phvul.009G245000	7.80416	35.3085	4.52432	2.1777	0.00306166	NA_SP
Phvul.002G059500	0.306828	1.35394	4.4127	2.14166	0.00988218	K04733 - interleukin-1 receptor-associated kinase 4 (IRAK4)
Phvul.008G215700	0.773111	3.36168	4.34825	2.12044	0.00988218	NA_SP
Phvul.006G075400	2.20576	9.2225	4.1811	2.06388	0.00306166	NA_SP
Phvul.001G239900	0.994476	4.14291	4.16592	2.05864	0.00306166	PTHR22298//PTHR22298:SF32 - ENDO-1,4-BETA-GLUCANASE // SUBFAMILY NOT NAMED
Phvul.007G092400	1.28767	5.33825	4.14567	2.05161	0.0136415	NA_SP
Phvul.007G260700	1.13907	4.6817	4.11011	2.03917	0.00306166	PTHR31388:SF8 - PEROXIDASE 53-RELATED
Phvul.009G030800	7.40167	29.7658	4.0215	2.00773	0.00306166	PTHR23500:SF44 - SUGAR TRANSPORT PROTEIN 5
Phvul.006G087800	0.683699	2.73102	3.99448	1.99801	0.00779766	PF00646//PF14299 - F-box domain (F-box) // Phloem protein 2 (PP2)
Phvul.011G076500	1.84846	7.28006	3.93845	1.97763	0.00306166	K15456 - protein KTI12 (KTI12)
Phvul.005G015900	0.823085	3.17343	3.85553	1.94693	0.0151885	PF00892 - EamA-like transporter family (EamA)
Phvul.009G119200	3.71209	14.3117	3.85543	1.94689	0.00306166	PTHR10044//PTHR10044:SF112 - INHIBITOR OF APOPTOSIS // SUBFAMILY NOT NAMED/E3ligase
Phvul.004G137300	0.278564	1.06624	3.82763	1.93646	0.0056073	PTHR11017//PTHR11017:SF171 - LEUCINE-RICH REPEAT-CONTAINING PROTEIN // SUBFAMILY NOT NAMED
Phvul.011G074100	0.385331	1.45765	3.78285	1.91947	0.00306166	PTHR10593//PTHR10593:SF51 - SERINE/THREONINE-PROTEIN KINASE RIO // SUBFAMILY NOT NAMED
Phvul.002G207300	3.55647	13.3442	3.75209	1.90769	0.00306166	PTHR24078 - DNAJ HOMOLOG SUBFAMILY C MEMBER
Phvul.009G078300	0.737336	2.75888	3.74169	1.90369	0.00306166	PTHR10015:SF186 - HEAT STRESS TRANSCRIPTION FACTOR A-2-RELATED
Phvul.008G249500	0.869254	3.22145	3.70599	1.88986	0.00306166	1.11.1.7 - Peroxidase / Lactoperoxidase
Phvul.011G199800	2.08906	7.7295	3.69999	1.88752	0.00306166	PTHR11783//PTHR11783:SF89 - SULFOTRANSFERASE SULT // SUBFAMILY NOT NAMED
Phvul.009G019900	0.948048	3.47542	3.66587	1.87415	0.00988218	NA_SP
Phvul.010G083300	3.51141	12.8138	3.64919	1.86758	0.00306166	Protein of unknown function (DUF1442)
Phvul.001G037100	1.21907	4.43643	3.63919	1.86362	0.00306166	5.3.99.5 - Thromboxane-A synthase / Thromboxane synthetase
Phvul.008G042700	2.75206	10.0054	3.6356	1.8622	0.00306166	1.1.2.6 - Polyvinyl alcohol dehydrogenase (cytochrome) / PVADH
Phvul.009G109100	0.811574	2.94538	3.62922	1.85966	0.00306166	K11159 - carotenoid cleavage dioxygenase (K11159)
Phvul.006G201100	1.74183	6.28927	3.61073	1.85229	0.00306166	2.4.1.91 - Flavonol 3-O-glucosyltransferase / UDP-glucose flavonol 3-O-glucosyltransferase
Phvul.003G268200	1.49801	5.3325	3.55972	1.83177	0.00306166	PF03087 - Arabidopsis protein of unknown function (DUF241)
Phvul.008G291800	2.81531	10.0038	3.55336	1.82918	0.00306166	PTHR32002:SF3 - PROTEIN NLP1-RELATED
Phvul.002G144600	1.36999	4.80743	3.5091	1.8111	0.00306166	PTHR11695:SF497 - CINNAMYL ALCOHOL DEHYDROGENASE 6-RELATED
Phvul.002G162500	0.777241	2.71129	3.48835	1.80254	0.0151885	AP2 domain
Phvul.004G143900	0.446713	1.55181	3.47384	1.79653	0.0136415	PTHR10217:SF475 - CYCLIC NUCLEOTIDE-GATED ION CHANNEL 19-RELATED
Phvul.001G092100	4.22277	14.6094	3.45967	1.79064	0.0492336	PF11820 - Protein of unknown function (DUF3339) (DUF3339)
Phvul.008G247700	2.36526	8.17675	3.45702	1.78953	0.00306166	NA_SP
Phvul.004G042600	1.97909	6.76584	3.41866	1.77343	0.00306166	PF01190 - Pollen proteins Ole e I like (Pollen_Ole_e_I)
Phvul.006G197500	1.20414	4.09459	3.40043	1.76572	0.0412438	PTHR10334//PTHR10334:SF200 - CYSTEINE-RICH SECRETORY PROTEIN-RELATED // SUBFAMILY NOT NAMED
Phvul.009G045601	2.41237	8.14985	3.37836	1.75632	0.00779766	NA_SP
Phvul.006G068900	30.9544	104.414	3.37316	1.7541	0.00306166	NA_SP
Phvul.001G065300	3.6174	12.1242	3.35163	1.74487	0.00306166	PTHR10209//PTHR10209:SF166 - OXIDOREDUCTASE, 2OG-FE II OXYGENASE FAMILY PROTEIN // SUBFAMILY NOT NAMED
Phvul.007G264900	0.811255	2.69561	3.32277	1.73238	0.021655	PTHR23024:SF102 - CARBOXYLESTERASE 15-RELATED
Phvul.011G110900	0.725572	2.40878	3.31984	1.73111	0.0136415	PF12609 - Wound-induced protein (DUF3774)
Phvul.008G244400	1.51239	5.01959	3.31898	1.73074	0.00306166	PTHR27003:SF36 - LEUCINE-RICH REPEAT PROTEIN KINASE-LIKE PROTEIN
Phvul.003G022000	0.792081	2.60999	3.2951	1.72033	0.00779766	PTHR22951//PTHR22951:SF25 - CLATHRIN ASSEMBLY PROTEIN // SUBFAMILY NOT NAMED
Phvul.008G002200	0.346141	1.13657	3.28355	1.71526	0.0387121	U-box domain
Phvul.008G247600	7.7228	25.2894	3.27464	1.71134	0.00306166	PTHR11746//PTHR11746:SF83 - O-METHYLTRANSFERASE // SUBFAMILY NOT NAMED
Phvul.010G067900	13.3614	43.0243	3.22004	1.68708	0.00306166	PTHR13902//PTHR13902:SF68 - SERINE/THREONINE-PROTEIN KINASE WNK WITH NO LYSINE -RELATED
Phvul.007G092000	1.09677	3.52295	3.21211	1.68352	0.0184454	PTHR31301:SF14 - LOB DOMAIN-CONTAINING PROTEIN 1-RELATED
Phvul.005G107400	0.81982	2.58787	3.15663	1.65839	0.00306166	PF04484 - Family of unknown function (DUF566) (DUF566)
Phvul.008G267600	5.29417	16.6284	3.14089	1.65117	0.00306166	PF01582//PF13676 - TIR domain (TIR) // TIR domain (TIR_2)
Phvul.004G024800	2.12377	6.60827	3.11158	1.63764	0.00306166	PTHR23070:SF44 - AAA-TYPE ATPASE FAMILY PROTEIN-RELATED
Phvul.009G045700	4.89055	15.2167	3.11145	1.63759	0.00306166	NA_SP
Phvul.011G122800	1.08988	3.37812	3.09953	1.63205	0.00306166	K08472 - mlo protein (MLO)
Phvul.006G148500	2.53808	7.7715	3.06196	1.61446	0.00306166	PF14476 - Petal formation-expressed (Chloroplast_duf)
Phvul.011G057700	0.731213	2.20882	3.02076	1.59491	0.00306166	K09955 - hypothetical protein (K09955)
Phvul.004G071800	0.756588	2.27184	3.00274	1.58628	0.0056073	PTHR31942:SF29 - MLO-LIKE PROTEIN 12-RELATED
Phvul.011G076400	2.07511	6.1831	2.97965	1.57514	0.0056073	K13106 - pre-mRNA-splicing factor CWC26 (BUD13, CWC26)
Phvul.009G229600	4.13981	12.3067	2.97277	1.5718	0.00306166	PTHR10052//PTHR10052:SF11 - 60S RIBOSOMAL PROTEIN L18A // SUBFAMILY NOT NAMED
Phvul.011G048700	16.7311	49.736	2.97267	1.57175	0.00306166	PTHR22924 - LEGHEMOGLOBIN-RELATED
Phvul.009G031300	0.519875	1.51923	2.9223	1.5471	0.0056073	K12118 - cryptochrome 1 (CRY1)
Phvul.010G026000	1.69583	4.94906	2.91837	1.54516	0.00306166	PF00931//PF01582 - NB-ARC domain (NB-ARC) // TIR domain (TIR)
Phvul.002G209400	7.34296	21.2562	2.89477	1.53345	0.00306166	PF00407 - Pathogenesis-related protein Bet v I family (Bet_v_1)
Phvul.003G162200	2.44503	7.0337	2.87673	1.52443	0.0399907	PF03386 - Early nodulin 93 ENOD93 protein (ENOD93)
Phvul.001G196000	0.92109	2.63414	2.85981	1.51592	0.0169169	PTHR22849:SF38 - E3 UBIQUITIN-PROTEIN LIGASE PUB22-RELATED
Phvul.008G086800	5.99197	17.0752	2.84968	1.5108	0.00306166	1.11.1.7 - Peroxidase / Lactoperoxidase
Phvul.002G156700	1.73816	4.89474	2.81605	1.49367	0.0056073	PTHR11913:SF30 - ACTIN-DEPOLYMERIZING FACTOR 10-RELATED
Phvul.009G070800	4.90777	13.8044	2.81276	1.49198	0.00306166	PF13912 - C2H2-type zinc finger (zf-C2H2_6)
Phvul.001G113900	1.19443	3.34574	2.80112	1.486	0.00306166	ANKYRIN REPEAT AND PROTEIN KINASE DOMAIN-CONTAINING PROTEIN
Phvul.007G135800	1.9477	5.45407	2.80026	1.48556	0.00306166	PTHR11926//PTHR11926:SF359 - GLUCOSYL/GLUCURONOSYL TRANSFERASES // SUBFAMILY NOT NAMED
Phvul.005G042100	2.24343	6.25581	2.7885	1.47949	0.0449305	PF05678 - VQ motif (VQ)
Phvul.009G244200	3.18746	8.87941	2.78573	1.47806	0.00306166	1.14.13.89 - Isoflavone 2'-hydroxylase / Isoflavone 2'-monooxygenase
Phvul.004G140500	0.335638	0.932082	2.77705	1.47355	0.0259247	PF00931//PF05729//PF13676 - NB-ARC domain (NB-ARC) // NACHT domain (NACHT) // TIR domain (TIR_2)
Phvul.005G095300	0.478839	1.32661	2.77047	1.47013	0.0136415	K01595 - phosphoenolpyruvate carboxylase (ppc)
Phvul.007G050600	0.990636	2.74088	2.76679	1.46821	0.00306166	PF01657//PF07714 - Salt stress response/antifungal (Stress-antifung) // Protein tyrosine kinase (Pkinase_Tyr)
Phvul.009G090700	0.0498201	0.135707	2.72394	1.4457	0.00306166	Flotillin (FLOT)
Phvul.001G189200	4.48999	12.1934	2.71569	1.44131	0.00306166	PTHR11362:SF13 - PROTEIN TERMINAL FLOWER 1
Phvul.008G222100	3.44339	9.3153	2.70527	1.43577	0.00306166	PTHR23315//PTHR23315:SF132 - BETA CATENIN-RELATED ARMADILLO REPEAT-CONTAINING // SUBFAMILY NOT NAMED
Phvul.009G030700	2.80881	7.59741	2.70485	1.43555	0.00306166	PTHR23500:SF44 - SUGAR TRANSPORT PROTEIN 5
Phvul.002G035300	1.86558	5.03432	2.69853	1.43217	0.0056073	PF04720 - PDDEXK-like family of unknown function (PDDEXK_6)
Phvul.008G152500	0.735227	1.97541	2.6868	1.42589	0.0136415	PF00560//PF07714//PF08263 - Leucine Rich Repeat (LRR_1) // Protein tyrosine kinase (Pkinase_Tyr) // Leucine rich repeat N-terminal domain (LRRNT_2)
Phvul.008G205600	1.30328	3.50055	2.68595	1.42543	0.00306166	K04733 - interleukin-1 receptor-associated kinase 4 (IRAK4)
Phvul.006G169400	1.4003	3.75379	2.6807	1.42261	0.00779766	PTHR22835//PTHR22835:SF177 - ZINC FINGER FYVE DOMAIN CONTAINING PROTEIN // SUBFAMILY NOT NAMED
Phvul.003G148550	3.8058	10.2006	2.68028	1.42238	0.00306166	PTHR10334//PTHR10334:SF229 - CYSTEINE-RICH SECRETORY PROTEIN-RELATED // SUBFAMILY NOT NAMED
Phvul.008G001600	1.49999	4.02016	2.68012	1.42231	0.00988218	PTHR31614:SF6 - POLLEN OLE E 1 ALLERGEN AND EXTENSIN FAMILY PROTEIN
Phvul.010G133700	4.43334	11.8623	2.6757	1.41991	0.00306166	PF13962 - Domain of unknown function (PGG)
Phvul.007G052900	0.732856	1.94872	2.65908	1.41092	0.042542	K03146 - thiamine thiazole synthase (THI4, THI1)
Phvul.004G154700	1.34726	3.5754	2.65383	1.40807	0.042542	PF13947//PF14380 - Wall-associated receptor kinase galacturonan-binding (GUB_WAK_bind) // Wall-associated receptor kinase C-terminal (WAK_assoc)
Phvul.002G204400	1.91301	5.04135	2.6353	1.39796	0.00306166	PF00892 - EamA-like transporter family (EamA)
Phvul.010G083400	5.68747	14.9434	2.62742	1.39365	0.00306166	PF07279 - Protein of unknown function (DUF1442) (DUF1442)
Phvul.007G051200	1.29792	3.39742	2.61759	1.38824	0.00306166	PF01657//PF07714 - Salt stress response/antifungal (Stress-antifung) // Protein tyrosine kinase (Pkinase_Tyr)
Phvul.004G014732	17.6082	46.055	2.61554	1.38711	0.00306166	Formate dehydrogenase
Phvul.009G115800	1.87244	4.88415	2.60844	1.38318	0.00306166	PTHR32002:SF3 - PROTEIN NLP1-RELATED
Phvul.006G059212	0.546545	1.42457	2.6065	1.38212	0.0449305	PTHR19241:SF155 - ABC TRANSPORTER G FAMILY MEMBER 26
Phvul.003G214350	1.73845	4.52931	2.60537	1.38149	0.00306166	PTHR24298:SF114 - CYTOCHROME P450 - LIKE PROTEIN-RELATED
Phvul.008G144100	3.02147	7.80676	2.58376	1.36947	0.0056073	PTHR31692:SF3 - BETA EXPANSIN 6-RELATED
Phvul.011G199600	5.60088	14.4676	2.58309	1.3691	0.00306166	PTHR11783//PTHR11783:SF89 - SULFOTRANSFERASE SULT // SUBFAMILY NOT NAMED
Phvul.002G304200	17.0337	43.5697	2.55785	1.35493	0.00306166	PTHR10209//PTHR10209:SF103 - OXIDOREDUCTASE, 2OG-FE II OXYGENASE FAMILY PROTEIN // SUBFAMILY NOT NAMED
Phvul.009G109700	3.11995	7.96332	2.55239	1.35184	0.00306166	Carlactone synthase
Phvul.004G157101	3.37681	8.59186	2.54437	1.34731	0.00779766	NA_SP
Phvul.008G032600	1.61615	4.08958	2.53045	1.33939	0.021655	NA_SP
Phvul.003G267000	1.23686	3.11287	2.51675	1.33157	0.00988218	Non-specific serine/threonine protein kinase / Threonine-specific protein kinase
Phvul.008G213200	5.65868	14.2267	2.51414	1.33007	0.00306166	Protein kinase domain (Pkinase) // Leucine Rich Repeat (LRR_1) // Leucine rich repeat N-terminal domain (LRRNT_2) // Leucine rich repeat (LRR_8)
Phvul.002G317600	1.89647	4.73935	2.49904	1.32138	0.00779766	NA_SP
Phvul.008G057600	26.9073	67.1784	2.49666	1.32	0.00306166	Caffeine synthase / Dimethylxanthine methyltransferase
Phvul.007G064800	2.2385	5.58458	2.49479	1.31892	0.00306166	Gibberellin-44 dioxygenase / Gibberellin A44 oxidase
Phvul.009G189700	3.19191	7.96253	2.4946	1.31881	0.00306166	PTHR31429:SF1 - WRKY FAMILY TRANSCRIPTION FACTOR-RELATED
Phvul.006G075800	138.858	345.19	2.48592	1.31378	0.00306166	Peroxidase / Lactoperoxidase
Phvul.008G007400	6.9602	17.2508	2.47849	1.30946	0.00306166	NA_SP
Phvul.002G100501	8.32024	20.5792	2.47339	1.30649	0.00306166	PTHR31301:SF15 - LOB DOMAIN-CONTAINING PROTEIN 4
Phvul.007G225200	5.088	12.5839	2.47325	1.3064	0.00306166	PTHR23241:SF11 - LATE EMBRYOGENESIS ABUNDANT PROTEIN (ATECP63)-RELATED
Phvul.008G008700	7.60435	18.8023	2.47257	1.30601	0.0316857	NA_SP
Phvul.003G061600	2.0319	5.0231	2.47212	1.30575	0.00306166	PTHR31375:SF46 - PECTIN LYASE-LIKE PROTEIN
Phvul.002G099700	10.0618	24.8482	2.46956	1.30426	0.00306166	PTHR11040:SF48 - ZINC TRANSPORTER 10-RELATED
Phvul.005G065300	1.22205	3.01402	2.46636	1.30239	0.00306166	Protein of unknown function
Phvul.001G201700	1.69629	4.15478	2.44933	1.29239	0.00306166	PTHR23196 - PAX TRANSCRIPTION ACTIVATION DOMAIN INTERACTING PROTEIN
Phvul.001G159300	7.67572	18.8003	2.44932	1.29238	0.00306166	PTHR31529:SF10 - LOB DOMAIN-CONTAINING PROTEIN 16
Phvul.001G163500	1.27806	3.10111	2.42642	1.27883	0.0136415	PTHR11654//PTHR11654:SF132 - OLIGOPEPTIDE TRANSPORTER-RELATED // SUBFAMILY NOT NAMED
Phvul.009G031400	5.84543	14.1685	2.42386	1.27731	0.00306166	PTHR13832:SF314 - PROTEIN PHOSPHATASE 2C 10-RELATED
Phvul.001G155600	3.75749	9.07407	2.41493	1.27198	0.00306166	K17911 - beta-carotene isomerase (DWARF27)
Phvul.003G086000	4.82466	11.6016	2.40465	1.26582	0.00306166	PTHR31246:SF5 - MICROTUBULE-ASSOCIATED PROTEIN 70-5
Phvul.007G194000	21.7955	52.2856	2.39892	1.26238	0.00306166	PTHR10209//PTHR10209:SF124 - OXIDOREDUCTASE, 2OG-FE II OXYGENASE FAMILY PROTEIN // SUBFAMILY NOT NAMED
Phvul.006G102200	8.93071	21.4094	2.39728	1.2614	0.00306166	PTHR22595:SF62 - HEVEIN-LIKE PREPROPROTEIN
Phvul.006G109000	22.2785	53.3815	2.3961	1.26069	0.00306166	PTHR11177//PTHR11177:SF170 - CHITINASE // SUBFAMILY NOT NAMED
Phvul.010G132433	1.31842	3.15876	2.39587	1.26055	0.0230331	PTHR11017//PTHR11017:SF163 - LEUCINE-RICH REPEAT-CONTAINING PROTEIN // SUBFAMILY NOT NAMED
Phvul.003G048800	3.33248	7.98009	2.39464	1.25981	0.0287741	NA_SP
Phvul.004G068900	1.8845	4.49389	2.38466	1.25379	0.0169169	PTHR31677:SF5 - ETHYLENE-RESPONSIVE TRANSCRIPTION FACTOR LEP
Phvul.006G053100	2.18949	5.20714	2.37824	1.24989	0.0056073	KOG0192//KOG0198 - Tyrosine kinase specific for activated (GTP-bound) p21cdc42Hs // MEKK and related serine/threonine protein kinases
Phvul.001G111800	16.9184	40.2018	2.37622	1.24867	0.00306166	PTHR31194:SF0 - ETHYLENE-RESPONSIVE TRANSCRIPTION FACTOR CRF3-RELATED
Phvul.009G076300	71.7705	170.308	2.37295	1.24668	0.00306166	PTHR13832:SF315 - PROTEIN PHOSPHATASE 2C 61-RELATED
Phvul.011G119900	1.76822	4.19128	2.37034	1.24509	0.0492336	PTHR33021:SF45 - EARLY NODULIN-LIKE PROTEIN 3-RELATED
Phvul.009G127900	6.25384	14.8223	2.37011	1.24496	0.00306166	PTHR11706//PTHR11706:SF38 - MANGANESE TRANSPORTER // SUBFAMILY NOT NAMED
Phvul.009G252800	4.16691	9.86031	2.36634	1.24265	0.021655	PF00407 - Pathogenesis-related protein Bet v I family (Bet_v_1)
Phvul.001G126600	3.82148	8.93818	2.33893	1.22585	0.00306166	NA_SP
Phvul.002G294200	0.734626	1.71605	2.33595	1.22401	0.0151885	PTHR23074:SF90 - P-LOOP CONTAINING NUCLEOSIDE TRIPHOSPHATE HYDROLASES SUPERFAMILY PROTEIN
Phvul.003G278100	7.98078	18.6266	2.33393	1.22276	0.00779766	NA_SP
Phvul.008G078500	5.6894	13.2763	2.33351	1.2225	0.00306166	PTHR10891:SF589 - CALCIUM-BINDING PROTEIN CML42-RELATED
Phvul.011G018000	20.7026	48.2426	2.33027	1.2205	0.00306166	PTHR11695//PTHR11695:SF538 - ALCOHOL DEHYDROGENASE RELATED // SUBFAMILY NOT NAMED
Phvul.001G250300	8.10411	18.8537	2.32644	1.21812	0.00306166	PTHR22814//PTHR22814:SF126 - COPPER TRANSPORT PROTEIN ATOX1-RELATED // SUBFAMILY NOT NAMED
Phvul.009G020600	17.2001	40.0014	2.32565	1.21764	0.00306166	PTHR23257:SF375 - RECEPTOR-INTERACTING SERINE/THREONINE-PROTEIN KINASE 1
Phvul.002G209500	12.4152	28.8254	2.32178	1.21524	0.00306166	PF00407 - Pathogenesis-related protein Bet v I family (Bet_v_1)
Phvul.001G036500	1.48778	3.43447	2.30845	1.20692	0.0119964	PTHR10593:SF38 - C2H2-LIKE ZINC FINGER PROTEIN-RELATED
Phvul.007G260800	10.6384	24.4441	2.29772	1.2002	0.00306166	PTHR31388:SF8 - PEROXIDASE 53-RELATED
Phvul.001G033800	14.0199	32.04	2.28532	1.19239	0.00306166	PTHR13832:SF315 - PROTEIN PHOSPHATASE 2C 61-RELATED
Phvul.001G045100	0.850196	1.94224	2.28446	1.19186	0.0485398	PF00582//PF07714 - Universal stress protein family (Usp) // Protein tyrosine kinase (Pkinase_Tyr)
Phvul.008G152801	1.79775	4.09573	2.27825	1.18793	0.0056073	9-cis-beta-carotene 9',10'-cleaving dioxygenase
Phvul.007G086600	3.70947	8.43167	2.27301	1.1846	0.0399907	PF00847 - AP2 domain (AP2)
Phvul.008G094900	3.94379	8.94085	2.26707	1.18083	0.00306166	PTHR11730:SF38 - AMMONIUM TRANSPORTER 2
Phvul.008G250600	2.4663	5.57701	2.26129	1.17714	0.019962	PTHR11746//PTHR11746:SF83 - O-METHYLTRANSFERASE // SUBFAMILY NOT NAMED
Phvul.008G112900	23.4634	52.9813	2.25804	1.17507	0.00306166	PTHR33122:SF4 - BIFUNCTIONAL INHIBITOR/LIPID-TRANSFER PROTEIN/SEED STORAGE 2S ALBUMIN-LIKE PROTEIN
Phvul.009G197800	29.8257	67.3434	2.2579	1.17498	0.00306166	Allyl-alcohol dehydrogenase // 2-alkenal reductase (NADP(+)) / NADPH-dependent alkenal/one oxidoreductase
Phvul.006G100500	4.29841	9.69999	2.25665	1.17418	0.00306166	PF13178 - Protein of unknown function (DUF4005) (DUF4005)
Phvul.011G134300	9.31744	21.0056	2.25444	1.17277	0.00306166	PTHR12565//PTHR12565:SF82 - STEROL REGULATORY ELEMENT-BINDING PROTEIN // SUBFAMILY NOT NAMED
Phvul.003G205900	106.689	239.181	2.24185	1.16468	0.00306166	PTHR34806:SF1 - HIGH-AFFINITY NITRATE TRANSPORTER 3.1-RELATED
Phvul.001G106300	2.73278	6.11397	2.23727	1.16174	0.0345363	NA_SP
Phvul.L002465	3.79313	8.48615	2.23724	1.16172	0.00988218	PTHR31319:SF1 - CCT MOTIF FAMILY PROTEIN
Phvul.008G049500	15.1281	33.6056	2.2214	1.15147	0.00306166	NA_SP
Phvul.005G100800	11.6831	25.9352	2.21989	1.1505	0.00306166	PTHR35274:SF2 - EXPRESSED PROTEIN-RELATED
Phvul.008G049400	24.7818	54.914	2.2159	1.14789	0.00306166	NA_SP
Phvul.009G234500	2.65644	5.85794	2.20518	1.1409	0.0119964	KOG0617 - Ras suppressor protein (contains leucine-rich repeats)
Phvul.007G039200	6.6768	14.7194	2.20456	1.14049	0.00306166	PTHR11926:SF167 - UDP-GLYCOSYLTRANSFERASE 84A1-RELATED
Phvul.011G046400	12.4349	27.2739	2.19333	1.13312	0.00306166	PF10950 - Protein of unknown function (DUF2775) (DUF2775)
Phvul.003G268400	1.7036	3.73365	2.19162	1.132	0.0345363	PF03087 - Arabidopsis protein of unknown function (DUF241)
Phvul.002G126200	4.01961	8.78256	2.18493	1.12759	0.00306166	PTHR24298:SF129 - CYTOCHROME P450
Phvul.009G092800	1.04805	2.28332	2.17864	1.12343	0.0259247	NA_SP
Phvul.002G014400	8.99574	19.5959	2.17835	1.12324	0.00306166	K14487 - auxin responsive GH3 gene family (GH3)
Phvul.003G204032	0.951848	2.07173	2.17653	1.12203	0.0412438	PTHR10638//PTHR10638:SF34 - COPPER AMINE OXIDASE // SUBFAMILY NOT NAMED
Phvul.006G136600	14.0704	30.5321	2.16995	1.11766	0.00306166	PTHR31964:SF10 - ADENINE NUCLEOTIDE ALPHA HYDROLASES-LIKE SUPERFAMILY PROTEIN
Phvul.001G230600	3.56329	7.69898	2.16064	1.11146	0.0169169	NA_SP
Phvul.002G092800	20.4838	44.1678	2.15623	1.10851	0.00306166	PF14009 - Domain of unknown function (DUF4228) (DUF4228)
Phvul.007G114000	4.57153	9.84166	2.15282	1.10622	0.00779766	2.1.1.150 - Isoflavone 7-O-methyltransferase
Phvul.009G134700	20.4282	43.9164	2.14979	1.1042	0.00306166	PTHR11695//PTHR11695:SF432 - ALCOHOL DEHYDROGENASE RELATED // SUBFAMILY NOT NAMED
Phvul.003G007200	2.02925	4.35947	2.14832	1.10321	0.00779766	PTHR23054:SF14 - PROTEIN Y45F10A.7, ISOFORM A
Phvul.001G072800	13.7583	29.3825	2.13562	1.09466	0.00306166	PTHR10219:SF34 - GENOMIC DNA, CHROMOSOME 3, P1 CLONE: MXL8
Phvul.008G195214	9.44946	20.1576	2.1332	1.09302	0.00306166	PTHR11017//PTHR11017:SF172 - LEUCINE-RICH REPEAT-CONTAINING PROTEIN // SUBFAMILY NOT NAMED
Phvul.005G072700	3.98978	8.51084	2.13316	1.09299	0.0492336	PTHR33227:SF2 - F8L10.2 PROTEIN
Phvul.003G091800	40.8574	87.0932	2.13164	1.09196	0.00306166	PTHR11772:SF18 - ALUMINUM INDUCED PROTEIN WITH YGL AND LRDR MOTIFS
Phvul.009G231700	2.80983	5.97598	2.12681	1.08869	0.00306166	PTHR13878//PTHR13878:SF14 - GULONOLACTONE OXIDASE // SUBFAMILY NOT NAMED
Phvul.011G081800	3.21415	6.80721	2.11789	1.08263	0.00306166	Non-specific serine/threonine protein kinase / Threonine-specific protein kinase
Phvul.004G123600	12.4954	26.4201	2.11439	1.08024	0.00306166	1.14.11.12 - Gibberellin-44 dioxygenase / Gibberellin A44 oxidase
Phvul.001G046400	9.73627	20.5794	2.11368	1.07976	0.00306166	PTHR11177//PTHR11177:SF208 - CHITINASE // SUBFAMILY NOT NAMED
Phvul.006G053800	1.85022	3.91063	2.1136	1.07971	0.00306166	PTHR24223:SF181 - ABC TRANSPORTER C FAMILY MEMBER 3-RELATED
Phvul.002G104300	14.4699	30.5163	2.10895	1.07652	0.0056073	NA_SP
Phvul.011G044500	3.45721	7.27007	2.10287	1.07236	0.021655	PTHR10366//PTHR10366:SF375 - NAD DEPENDENT EPIMERASE/DEHYDRATASE // SUBFAMILY NOT NAMED
Phvul.001G249700	95.9071	201.546	2.10147	1.0714	0.00306166	NA_SP
Phvul.001G022400	2.17599	4.57251	2.10135	1.07131	0.0056073	PF01094 - Receptor family ligand binding region (ANF_receptor)
Phvul.003G003100	5.38468	11.2957	2.09775	1.06884	0.00779766	Peroxidase / Lactoperoxidase
Phvul.006G148000	2.64963	5.53296	2.0882	1.06226	0.0287741	PTHR24361:SF396 - MITOGEN-ACTIVATED PROTEIN KINASE KINASE KINASE 15-RELATED
Phvul.010G148000	1.81611	3.76591	2.07361	1.05215	0.0136415	PTHR11654:SF157 - PROTEIN NRT1/ PTR FAMILY 1.1-RELATED
Phvul.006G165000	3.44072	7.1217	2.06983	1.04951	0.0151885	PTHR10209:SF171 - GIBBERELLIN 2-BETA-DIOXYGENASE 2-RELATED
Phvul.008G100400	2.73251	5.65006	2.06772	1.04804	0.00779766	PTHR11709:SF66 - LACCASE-17
Phvul.004G127400	6.98179	14.4335	2.06731	1.04775	0.0151885	NA_SP
Phvul.003G021300	3.4077	7.03943	2.06574	1.04666	0.0136415	PTHR11562//PTHR11562:SF60 - CATION EFFLUX PROTEIN/ ZINC TRANSPORTER // SUBFAMILY NOT NAMED
Phvul.L001653	1.8183	3.74608	2.06021	1.04279	0.0412438	PF03140 - Plant protein of unknown function (DUF247)
Phvul.002G244900	29.4874	60.6826	2.05792	1.04118	0.00306166	PTHR14255//PTHR14255:SF6 - ATP-DEPENDENT PROTEASE CEREBLON // SUBFAMILY NOT NAMED
Phvul.004G142000	6.62788	13.6185	2.05473	1.03895	0.00306166	PTHR24064:SF271 - ORGANIC CATION/CARNITINE TRANSPORTER 1
Phvul.008G225500	2.54606	5.21712	2.0491	1.03499	0.0136415	PF07014 - Hs1pro-1 protein C-terminus (Hs1pro-1_C)
Phvul.007G045400	2.05081	4.19177	2.04396	1.03137	0.0151885	PTHR31490:SF18 - 1,4-BETA-XYLAN ENDOHYDROLASE-RELATED
Phvul.004G018900	15.5615	31.7714	2.04167	1.02975	0.00306166	K10529 - alpha-dioxygenase (DOX1)
Phvul.007G060800	8.0311	16.3786	2.0394	1.02814	0.00306166	KOG4579 - Leucine-rich repeat (LRR) protein associated with apoptosis in muscle tissue
Phvul.008G238500	4.04072	8.20935	2.03166	1.02266	0.00306166	PTHR22849:SF43 - U-BOX DOMAIN-CONTAINING PROTEIN 54-RELATED
Phvul.011G025400	2.02176	4.09728	2.02659	1.01906	0.0169169	PTHR11709:SF64 - MULTI-COPPER OXIDASE TYPE I FAMILY PROTEIN-RELATED
Phvul.003G183100	1.73061	3.50514	2.02538	1.01819	0.0302455	PTHR24298:SF112 - CYTOCHROME P450 78A5-RELATED
Phvul.011G206400	1.9445	3.93307	2.02266	1.01625	0.0399907	PTHR31604:SF2 - PROTEIN SHI RELATED SEQUENCE 6
Phvul.001G243100	3.91352	7.87961	2.01343	1.00966	0.0056073	K05857 - phosphatidylinositol phospholipase C, delta (PLCD)
Phvul.010G034400	2.59165	5.21349	2.01165	1.00838	0.00306166	K08472 - mlo protein (MLO)
Phvul.003G193000	3.69836	7.43863	2.01133	1.00815	0.019962	PF04982 - HPP family (HPP)
Phvul.007G125500	17.9608	36.117	2.01088	1.00783	0.0259247	PF00280 - Potato inhibitor I family (potato_inhibit)
Phvul.001G268600	5.42701	10.9129	2.01085	1.00781	0.0056073	2.5.1.32 - 15-cis-phytoene synthase / PSase
Phvul.002G312400	8.62429	17.3112	2.00726	1.00522	0.00306166	PTHR10460//PTHR10460:SF11 - ABL INTERACTOR // SUBFAMILY NOT NAMED
Phvul.001G246700	1.67612	3.36379	2.00689	1.00497	0.0399907	PTHR11709:SF22 - LACCASE-12-RELATED
Phvul.009G122700	2.91285	1.5457	0.530649	-0.914171	0.00306166	GRAS Family Transcription Factor
Phvul.010G111100	30.6992	15.2331	0.496205	-1.01099	0.00306166	K16240 - protein suppressor of PHYA-105 1 (SPA1)
Phvul.002G076500	9.0499	4.48519	0.495607	-1.01273	0.0469326	3.4.24.34 - Neutrophil collagenase / Matrix metalloproteinase 8
Phvul.008G278800	10.0598	4.96204	0.493254	-1.0196	0.0492336	PTHR35708:SF1 - GB
Phvul.010G151732	59.7649	29.4169	0.49221	-1.02265	0.00306166	PTHR31734:SF12 - AUXIN-RESPONSIVE PROTEIN IAA19-RELATED
Phvul.006G199300	21.9034	10.7442	0.490527	-1.02759	0.0287741	PF12734 - Cysteine-rich TM module stress tolerance (CYSTM)
Phvul.006G077200	39.7073	19.2209	0.484065	-1.04673	0.00306166	PTHR31867:SF22 - EXPANSIN-A8
Phvul.005G016400	5.58947	2.64855	0.473846	-1.07751	0.0345363	PTHR23024//PTHR23024:SF135 - MEMBER OF 'GDXG' FAMILY OF LIPOLYTIC ENZYMES // SUBFAMILY NOT NAMED
Phvul.009G083300	5.96405	2.80761	0.470756	-1.08695	0.0056073	Non-specific serine/threonine protein kinase / Threonine-specific protein kinase
Phvul.002G195800	41.8902	19.6411	0.468871	-1.09274	0.00306166	NA_SP
Phvul.007G062000	61.0326	28.4427	0.466025	-1.10152	0.00306166	PTHR14154:SF5 - EARLY LIGHT-INDUCED PROTEIN 1, CHLOROPLASTIC-RELATED
Phvul.009G148300	8.96657	4.17739	0.465885	-1.10195	0.00306166	PTHR14221//PTHR14221:SF8 - WD REPEAT DOMAIN 44 // SUBFAMILY NOT NAMED
Phvul.007G153500	30.8645	14.3702	0.46559	-1.10287	0.00306166	K08903 - photosystem II 13kDa protein (psb28)
Phvul.002G075200	23.4415	10.7434	0.458307	-1.12562	0.00306166	N-hydroxythioamide S-beta-glucosyltransferase / Uridine diphosphoglucose-thiohydroximate glucosyltransferase
Phvul.008G001100	4.83903	2.20065	0.454771	-1.13679	0.0485398	Sugar efflux transporter for intercellular exchange (MtN3_slv) // PQ loop repeat (PQ-loop)
Phvul.008G094800	3.97411	1.80557	0.454333	-1.13818	0.0136415	PF00249 - Myb-like DNA-binding domain (Myb_DNA-binding)
Phvul.004G062400	127.669	57.8361	0.453016	-1.14237	0.00306166	PTHR31062:SF15 - XYLOGLUCAN ENDOTRANSGLUCOSYLASE/HYDROLASE PROTEIN 4-RELATED
Phvul.004G163300	23.7343	10.7091	0.451208	-1.14814	0.00306166	PTHR10015:SF187 - HEAT STRESS TRANSCRIPTION FACTOR C-1
Phvul.010G098500	4.28696	1.92	0.44787	-1.15885	0.0119964	PTHR11514:SF38 - TRANSCRIPTION FACTOR MYC1
Phvul.003G228600	1.99268	0.8873	0.44528	-1.16722	0.0302455	PTHR31312:SF2 - TWO-COMPONENT RESPONSE REGULATOR-LIKE APRR2
Phvul.002G196050	153.489	68.2312	0.444535	-1.16963	0.00306166	NA_SP
Phvul.007G135400	89.4474	39.3397	0.439808	-1.18505	0.00306166	PTHR11404:SF24 - SUPEROXIDE DISMUTASE [FE] 2, CHLOROPLASTIC
Phvul.001G031400	16.1267	7.05147	0.437254	-1.19345	0.00306166	PTHR33088:SF9 - HYDROXYPROLINE-RICH GLYCOPROTEIN FAMILY PROTEIN
Phvul.004G144900	5.18263	2.22757	0.429815	-1.21821	0.00988218	PTHR10641:SF665 - MYB TRANSCRIPTION FACTOR
Phvul.002G260000	5.47825	2.31618	0.422796	-1.24196	0.0136415	NA_SP
Phvul.007G058600	7.65318	3.15183	0.411833	-1.27987	0.0119964	PTHR33044:SF13 - BIFUNCTIONAL INHIBITOR/LIPID-TRANSFER PROTEIN/SEED STORAGE 2S ALBUMIN-LIKE PROTEIN-RELATED
Phvul.003G091400	10.693	4.35966	0.407712	-1.29438	0.0056073	NA_SP
Phvul.006G203000	70.4309	28.6668	0.40702	-1.29683	0.00306166	NA_SP
Phvul.002G052100	5.1846	2.10408	0.405833	-1.30105	0.03327	PTHR16223:SF9 - TRANSCRIPTION FACTOR BHLH139-RELATED
Phvul.001G250700	8.54812	3.44405	0.402901	-1.3115	0.00306166	PTHR11814//PTHR11814:SF103 - SULFATE TRANSPORTER // SUBFAMILY NOT NAMED
Phvul.007G046400	4.02659	1.61497	0.401076	-1.31806	0.00306166	PTHR11119:SF51 - NUCLEOBASE-ASCORBATE TRANSPORTER 4
Phvul.005G104600	42.4948	16.949	0.398849	-1.32609	0.00306166	PTHR31692:SF5 - EXPANSIN-B1-RELATED
Phvul.004G124200	64.5748	25.532	0.395386	-1.33866	0.00306166	PTHR13935:SF54 - TRANSCRIPTION FACTOR BHLH118-RELATED
Phvul.002G265400	8.098	3.14506	0.388375	-1.36448	0.0151885	PTHR31221:SF36 - WRKY TRANSCRIPTION FACTOR 50-RELATED
Phvul.006G154100	67.2447	26.1089	0.388267	-1.36488	0.00306166	NA_SP
Phvul.009G181500	6.59928	2.56113	0.388092	-1.36553	0.0360139	PTHR23201//PTHR23201:SF18 - EXTENSIN, PROLINE-RICH PROTEIN // SUBFAMILY NOT NAMED
Phvul.011G119700	9.96583	3.85544	0.386866	-1.37009	0.00306166	PF03007//PF06974 - Wax ester synthase-like Acyl-CoA acyltransferase domain (WES_acyltransf) // Protein of unknown function
Phvul.011G044600	2.87031	1.10914	0.386418	-1.37177	0.00988218	PTHR10366//PTHR10366:SF375 - NAD DEPENDENT EPIMERASE/DEHYDRATASE // SUBFAMILY NOT NAMED
Phvul.008G192000	3.05982	1.17212	0.383068	-1.38432	0.0056073	PTHR15486:SF25 - GLYCEROL-3-PHOSPHATE ACYLTRANSFERASE 5-RELATED
Phvul.002G203800	73.0294	27.947	0.382681	-1.38578	0.00306166	NA_SP
Phvul.007G135500	14.2034	5.40437	0.380498	-1.39404	0.0119964	PTHR33021:SF70 - UCLACYANIN I-RELATED
Phvul.003G107600	15.1925	5.73612	0.377563	-1.40521	0.00306166	NA_SP
Phvul.009G186800	4.82811	1.80859	0.374596	-1.41659	0.00988218	PTHR22835//PTHR22835:SF267 - ZINC FINGER FYVE DOMAIN CONTAINING PROTEIN // SUBFAMILY NOT NAMED
Phvul.006G013900	2.32441	0.861138	0.370476	-1.43255	0.0056073	PTHR19241:SF158 - ABC TRANSPORTER G FAMILY MEMBER 23
Phvul.002G297500	6.84556	2.53259	0.369961	-1.43456	0.0387121	PF05922 - Peptidase inhibitor I9 (Inhibitor_I9)
Phvul.004G098000	4.82808	1.73732	0.359837	-1.47459	0.0056073	PF04554 - Extensin-like region (Extensin_2)
Phvul.001G198400	1.87184	0.666639	0.356141	-1.48948	0.0169169	PTHR19241//PTHR19241:SF286 - ATP-BINDING CASSETTE TRANSPORTER // SUBFAMILY NOT NAMED
Phvul.002G211900	34.635	12.1896	0.351945	-1.50658	0.00306166	NA_SP
Phvul.006G202800	10.8109	3.7655	0.348306	-1.52157	0.00306166	NA_SP
Phvul.001G147400	2.85017	0.987788	0.346572	-1.52877	0.0056073	PTHR14859 - CALCOFLUOR WHITE HYPERSENSITIVE PROTEIN PRECURSOR
Phvul.008G160500	4.64883	1.60882	0.34607	-1.53087	0.0169169	PTHR26402//PTHR26402:SF498 - RESPONSE REGULATOR OF TWO-COMPONENT SYSTEM // SUBFAMILY NOT NAMED
Phvul.005G067900	63.0059	21.7932	0.345891	-1.53161	0.00988218	NA_SP
Phvul.003G067400	55.5944	18.8084	0.338315	-1.56356	0.00306166	NA_SP
Phvul.008G123600	3.3721	1.14078	0.3383	-1.56363	0.0230331	PTHR36326:SF1 - PROTEIN MALE STERILE 5
Phvul.006G202900	20.4143	6.78573	0.332401	-1.589	0.0056073	NA_SP
Phvul.007G173500	16.2821	5.16631	0.3173	-1.65609	0.00306166	PTHR33044:SF23 - BIFUNCTIONAL INHIBITOR/LIPID-TRANSFER PROTEIN/SEED STORAGE 2S ALBUMIN SUPERFAMILY PROTEIN
Phvul.009G135400	6.0602	1.85869	0.306704	-1.70508	0.00306166	PF00892 - EamA-like transporter family (EamA)
Phvul.007G227900	2.56998	0.781998	0.304282	-1.71652	0.0456544	Trihydroxypterocarpan dimethylallyltransferase / Glyceollin synthase
Phvul.007G092500	1.69105	0.510167	0.301687	-1.72888	0.021655	K03231 - elongation factor 1-alpha (EEF1A)
Phvul.008G179700	93.972	28.206	0.300153	-1.73623	0.0119964	NA_SP
Phvul.001G203600	5.58931	1.66224	0.297396	-1.74954	0.00306166	PTHR10168:SF81 - MONOTHIOL GLUTAREDOXIN-S1-RELATED
Phvul.003G167700	3.25015	0.965918	0.297192	-1.75054	0.0151885	K14484 - auxin-responsive protein IAA (IAA)
Phvul.007G027100	1.06968	0.315793	0.295222	-1.76013	0.0151885	PTHR31561:SF5 - 3-KETOACYL-COA SYNTHASE 5-RELATED
Phvul.004G032300	1.89369	0.553643	0.292362	-1.77417	0.00306166	Acid phosphatase / Phosphomonoesterase // Phosphoserine phosphatase //
Phvul.001G067400	3.69541	1.07106	0.289835	-1.78669	0.0456544	PTHR10891//PTHR10891:SF530 - EF-HAND CALCIUM-BINDING DOMAIN CONTAINING PROTEIN
Phvul.003G010600	4.73795	1.37123	0.289414	-1.7888	0.00306166	PTHR24096:SF134 - LONG CHAIN ACYL-COA SYNTHETASE 2
Phvul.010G043400	15.9016	4.56818	0.287278	-1.79948	0.00306166	PTHR23042//PTHR23042:SF57 - CIRCADIAN PROTEIN CLOCK/ARNT/BMAL/PAS // SUBFAMILY NOT NAMED
Phvul.001G172400	1.0175	0.279407	0.274601	-1.86459	0.019962	PTHR19241:SF258 - ABC TRANSPORTER G FAMILY MEMBER 17-RELATED
Phvul.001G258900	30.1863	8.21794	0.272241	-1.87705	0.00306166	PF06522 - NADH-ubiquinone reductase complex 1 MLRQ subunit (B12D)
Phvul.010G099900	1.57967	0.420925	0.266464	-1.90799	0.0399907	PTHR24296:SF9 - CYTOCHROME P450 86A2-RELATED
Phvul.003G189500	4.37746	1.1534	0.263486	-1.92421	0.00306166	PTHR22835//PTHR22835:SF267 - ZINC FINGER FYVE DOMAIN CONTAINING PROTEIN // SUBFAMILY NOT NAMED
Phvul.003G248600	8.45109	2.21714	0.26235	-1.93044	0.00306166	PTHR22835//PTHR22835:SF147 - ZINC FINGER FYVE DOMAIN CONTAINING PROTEIN // SUBFAMILY NOT NAMED
Phvul.006G191200	6.03446	1.56266	0.258956	-1.94922	0.00306166	PTHR33098:SF10 - T28P6.11 PROTEIN
Phvul.004G158200	3.34759	0.865886	0.25866	-1.95087	0.00779766	PF00139 - Legume lectin domain (Lectin_legB)
Phvul.007G103700	3.48037	0.891042	0.256019	-1.96567	0.00306166	PTHR22835//PTHR22835:SF224 - ZINC FINGER FYVE DOMAIN CONTAINING PROTEIN // SUBFAMILY NOT NAMED
Phvul.003G245500	24.8694	6.32507	0.254331	-1.97522	0.00306166	NA_SP
Phvul.002G249300	2.73083	0.690135	0.25272	-1.98439	0.00779766	PTHR24343:SF101 - SERINE/THREONINE-PROTEIN KINASE SRK2A-RELATED
Phvul.001G061000	6.93097	1.65062	0.238151	-2.07005	0.00306166	PTHR14255//PTHR14255:SF1 - ATP-DEPENDENT PROTEASE CEREBLON // SUBFAMILY NOT NAMED
Phvul.010G061500	4.7154	1.11614	0.236701	-2.07886	0.00306166	PF07107 - Wound-induced protein WI12 (WI12)
Phvul.003G162500	8.12654	1.91416	0.235544	-2.08593	0.00306166	PTHR23111//PTHR23111:SF41 - ZINC FINGER PROTEIN // SUBFAMILY NOT NAMED
Phvul.006G065000	3.34118	0.776274	0.232335	-2.10572	0.00306166	Unspecific monooxygenase / Xenobiotic monooxygenase // Alkane 1-monooxygenase / Omega-hydroxylase
Phvul.005G153500	1.68819	0.385592	0.228406	-2.13033	0.0345363	PTHR31832:SF8 - B-BOX TYPE ZINC FINGER-CONTAINING PROTEIN-RELATED
Phvul.006G086100	3.5852	0.802664	0.223883	-2.15919	0.00306166	PF00501//PF13193 - AMP-binding enzyme (AMP-binding) // AMP-binding enzyme C-terminal domain (AMP-binding_C)
Phvul.001G153600	5.69897	1.20013	0.210587	-2.24751	0.00306166	PF14368 - Probable lipid transfer (LTP_2)
Phvul.004G158000	57.8269	11.9774	0.207125	-2.27143	0.00306166	PF00139 - Legume lectin domain (Lectin_legB)
Phvul.007G242100	1.34421	0.269495	0.200486	-2.31843	0.0184454	PTHR10795//PTHR10795:SF348 - PROPROTEIN CONVERTASE SUBTILISIN/KEXIN // SUBFAMILY NOT NAMED
Phvul.008G058000	3.77777	0.755102	0.19988	-2.32279	0.0387121	PTHR31221:SF7 - WRKY TRANSCRIPTION FACTOR 24-RELATED
Phvul.008G011500	3.77261	0.740435	0.196266	-2.34912	0.00306166	PTHR13871//PTHR13871:SF40 - THIOREDOXIN // SUBFAMILY NOT NAMED
Phvul.009G218200	11.3871	2.14447	0.188325	-2.4087	0.00306166	PTHR11615//PTHR11615:SF120 - NITRATE, FROMATE, IRON DEHYDROGENASE // SUBFAMILY NOT NAMED
Phvul.008G262600	0.995066	0.182721	0.183627	-2.44515	0.042542	Unspecific monooxygenase / Xenobiotic monooxygenase // Alkane 1-monooxygenase / Omega-hydroxylase
Phvul.009G105300	1.34152	0.231664	0.172688	-2.53376	0.042542	PTHR31236:SF2 - DEHYDRATION-RESPONSIVE PROTEIN RD22
Phvul.005G088618	2.63415	0.370535	0.140666	-2.82965	0.0184454	NA_SP
Phvul.009G186700	6.04686	0.724156	0.119757	-3.06181	0.0259247	NA_SP
Phvul.011G125800	12.2799	1.31116	0.106773	-3.22738	0.019962	PTHR36816:SF1 - ATP SYNTHASE PROTEIN YMF19
Phvul.008G011800	3.94891	0.285146	0.0722088	-3.79168	0.0136415	PTHR13871//PTHR13871:SF40 - THIOREDOXIN // SUBFAMILY NOT NAMED
Phvul.005G071400	1.18657	ND	ND	ND	0.00306166	PF00304 - Gamma-thionin family (Gamma-thionin)
Phvul.008G196700	34.1929	ND	ND	ND	0.00306166	NA_SP
Phvul.009G080000	0.944232	ND	ND	ND	0.00306166	PF03106 - WRKY DNA -binding domain (WRKY)
UD:undetermined; NA_SP: No annotation
