# Supplementary material for: Phosphate Deficiency Negatively Affects Early Steps of the Symbiosis between Common Bean and Rhizobia
Source: Preprints.org preprint supplement (doi:10.20944/preprints201809.0207.v1), 2018-09-12
Supplement: Supplementary file 5 [file TableS4.xlsx]

## Sheet: Pdef_Upregulated.txt
Table S4: Commonly regulated genes in both optimal- and low phosphate conditions
Gene ID	FPKM_OP_Mock	FPKM_OP_Rhizobia	Fold-Change	Log2Fold-Change	FPKM_LP_Mock	FPKM_LP_Rhizobia	Fold-Change	Log2Fold-Change
Phvul.001G022400	2.15867	7.18048	3.32634	1.73394	2.17599	4.57251	2.10135	1.07131
Phvul.001G033800	17.1428	64.2572	3.74835	1.90626	14.0199	32.04	2.28532	1.1924
Phvul.001G036500	1.88044	4.25984	2.26534	1.17973	1.48778	3.43447	2.30845	1.20693
Phvul.001G039100	4.07107	27.1521	6.66952	2.73758	3.61619	19.239	5.32024	2.41149
Phvul.001G046400	7.71752	22.3989	2.90234	1.53722	9.73627	20.5794	2.11368	1.07976
Phvul.001G065300	7.03891	19.3659	2.75126	1.46009	3.6174	12.1242	3.35163	1.74486
Phvul.001G072800	15.8127	45.0946	2.8518	1.51187	13.7583	29.3825	2.13562	1.09465
Phvul.001G092100	3.76578	21.7963	5.78799	2.53306	4.22277	14.6094	3.45967	1.79064
Phvul.001G106300	2.12348	4.87715	2.29677	1.19961	2.73278	6.11397	2.23727	1.16174
Phvul.001G111800	15.1566	42.2128	2.78511	1.47773	16.9184	40.2018	2.37622	1.24867
Phvul.001G113900	1.42374	5.8398	4.10173	2.03623	1.19443	3.34574	2.80112	1.486
Phvul.001G126600	5.10696	11.2822	2.20918	1.14351	3.82148	8.93818	2.33893	1.22585
Phvul.001G155600	4.4105	12.4713	2.82764	1.4996	3.75749	9.07407	2.41493	1.27198
Phvul.001G159300	7.31633	16.3193	2.23053	1.15739	7.67572	18.8003	2.44932	1.29238
Phvul.001G163500	1.62461	4.47337	2.7535	1.46127	1.27806	3.10111	2.42642	1.27883
Phvul.001G230600	3.41076	9.17463	2.68991	1.42756	3.56329	7.69898	2.16064	1.11146
Phvul.001G237500	0	1.35018	ND	ND	0	1.20774	ND	ND
Phvul.001G243100	2.71075	7.95455	2.93445	1.55309	3.91352	7.87961	2.01343	1.00966
Phvul.001G261500	5.2852	39.7846	7.52755	2.91218	11.9153	83.6752	7.0225	2.81198
Phvul.002G014400	7.98583	20.4138	2.55625	1.35403	8.99574	19.5959	2.17835	1.12324
Phvul.002G059500	0.297744	1.44854	4.86505	2.28246	0.306828	1.35394	4.4127	2.14166
Phvul.002G064166	392.381	4745.67	12.0945	3.59628	516.758	5457.23	10.5605	3.40061
Phvul.002G064232	74.2498	1408.93	18.9755	4.24607	144.349	1669.65	11.5668	3.53191
Phvul.002G080100	6.95678	17.9599	2.58164	1.36829	2.72169	17.4403	6.40789	2.67985
Phvul.002G092800	19.249	45.5257	2.36509	1.2419	20.4838	44.1678	2.15623	1.10851
Phvul.002G099700	11.8458	69.7544	5.88853	2.55791	10.0618	24.8482	2.46956	1.30425
Phvul.002G100501	8.36206	21.1508	2.52938	1.33878	8.32024	20.5792	2.47339	1.30649
Phvul.002G104300	11.6292	35.5822	3.05973	1.6134	14.4699	30.5163	2.10895	1.07653
Phvul.002G126200	2.55357	12.6538	4.95534	2.30898	4.01961	8.78256	2.18493	1.12759
Phvul.002G144600	1.13918	3.65429	3.20782	1.6816	1.36999	4.80743	3.5091	1.8111
Phvul.002G156700	1.84861	6.12795	3.3149	1.72896	1.73816	4.89474	2.81605	1.49367
Phvul.002G171100	0.837315	5.62529	6.71825	2.74809	0.871392	5.0392	5.78293	2.5318
Phvul.002G204400	1.77888	4.6874	2.63503	1.39782	1.91301	5.04135	2.6353	1.39797
Phvul.002G205100	0.351693	3.96685	11.2793	3.49561	0.350006	8.02589	22.9307	4.51921
Phvul.002G209400	3.22788	8.14174	2.52232	1.33475	7.34296	21.2562	2.89477	1.53345
Phvul.002G230600	0	2.32484	ND	ND	0	6.18835	ND	ND
Phvul.002G244900	29.2436	74.1691	2.53625	1.3427	29.4874	60.6826	2.05792	1.04118
Phvul.002G293200	2.40352	8.77187	3.64959	1.86774	0.734626	1.71605	2.33595	1.22401
Phvul.002G304400	0.823686	15.2094	18.465	4.20672	1.84379	22.4647	12.184	3.60691
Phvul.002G317600	2.88834	9.41879	3.26097	1.7053	1.89647	4.73935	2.49904	1.32137
Phvul.002G319108	0	9.69768	ND	ND	0	13.8135	ND	ND
Phvul.002G329800	0.423014	19.4694	46.0254	5.52436	0.407826	18.5901	45.5834	5.51044
Phvul.003G003100	4.62482	19.3495	4.18384	2.06483	5.38468	11.2957	2.09775	1.06884
Phvul.003G007200	2.59158	5.44086	2.09944	1.07	2.02925	4.35947	2.14832	1.10321
Phvul.003G021300	4.49218	12.9406	2.88069	1.52642	3.4077	7.03943	2.06574	1.04666
Phvul.003G022000	1.02329	3.02774	2.95883	1.56503	0.792081	2.60999	3.2951	1.72032
Phvul.003G054700	3.27358	12.2958	3.75607	1.90922	2.09216	10.4244	4.9826	2.3169
Phvul.003G149200	4.24517	56.0472	13.2026	3.72275	6.46796	56.5648	8.74538	3.12852
Phvul.003G155600	0	1.65252	ND	ND	0	4.38575	ND	ND
Phvul.003G158800	0.503876	8.75145	17.3683	4.11838	0.821404	8.70206	10.5941	3.40519
Phvul.003G193000	2.76214	6.68412	2.41991	1.27495	3.69836	7.43863	2.01133	1.00815
Phvul.003G204032	1.0297	4.85266	4.71269	2.23655	0.951848	2.07173	2.17653	1.12203
Phvul.003G205900	86.6633	359.703	4.15058	2.05331	106.689	239.181	2.24185	1.16469
Phvul.003G214100	1.80937	42.7931	23.6508	4.56382	2.01342	40.3623	20.0466	4.32529
Phvul.003G214350	2.26747	4.99911	2.20471	1.14059	1.73845	4.52931	2.60537	1.38149
Phvul.003G234100	0.895268	8.20669	9.16674	3.19641	0.717659	8.44927	11.7734	3.55746
Phvul.003G268400	1.9144	4.23751	2.21349	1.14632	1.7036	3.73365	2.19162	1.132
Phvul.003G278100	8.17583	28.4149	3.47548	1.79721	7.98078	18.6266	2.33393	1.22276
Phvul.004G068200	1.44749	3.14869	2.17528	1.1212	0.324438	1.55816	4.80264	2.26383
Phvul.004G071800	1.20914	3.00002	2.48112	1.31099	0.756588	2.27184	3.00274	1.58628
Phvul.004G090800	0.725293	2.31165	3.18719	1.67229	0	0.825528	ND	ND
Phvul.004G090994	80.3742	235.287	2.92739	1.54962	4.06248	233.609	57.504	5.84559
Phvul.004G106300	0.353771	18.4532	52.1614	5.70491	0.550534	18.4937	33.5923	5.07006
Phvul.004G124100	0.671831	9.80729	14.5979	3.86768	0.227031	10.1675	44.7846	5.48493
Phvul.004G127400	7.02508	19.1912	2.73181	1.44986	6.98179	14.4335	2.06731	1.04775
Phvul.004G137300	0.42436	1.56481	3.68746	1.88263	0.278564	1.06624	3.82763	1.93645
Phvul.004G143900	0.44536	2.64065	5.92925	2.56785	0.446713	1.55181	3.47384	1.79653
Phvul.004G157101	2.02711	5.95107	2.93574	1.55372	3.37681	8.59186	2.54437	1.34731
Phvul.005G042100	1.51817	6.40169	4.21671	2.07612	2.24343	6.25581	2.7885	1.47949
Phvul.005G045300	0.144846	6.73839	46.5211	5.53981	0.111023	5.33049	48.0125	5.58534
Phvul.005G050500	0	0.87267	ND	ND	0	1.65375	ND	ND
Phvul.005G052500	1.59304	19.7495	12.3974	3.63196	2.55751	16.7479	6.54852	2.71117
Phvul.005G065300	1.14278	3.27667	2.86728	1.51968	1.22205	3.01402	2.46636	1.30239
Phvul.005G072700	5.15477	11.5277	2.23632	1.16112	3.98978	8.51084	2.13316	1.09299
Phvul.005G095300	0.481278	1.04149	2.16401	1.11371	0.478839	1.32661	2.77047	1.47013
Phvul.005G107400	0.6352	3.06681	4.8281	2.27146	0.81982	2.58787	3.15663	1.65839
Phvul.005G111800	0.293008	6.15231	20.9971	4.39212	0.245697	2.74955	11.1908	3.48424
Phvul.005G117300	0.42441	10.4935	24.7249	4.62789	0.88426	9.24403	10.454	3.38598
Phvul.005G157800	0.104838	6.06425	57.844	5.8541	0.165738	4.76611	28.7569	4.84584
Phvul.005G165300	0	1.08996	ND	ND	0	2.80617	ND	ND
Phvul.005G173500	0.36157	3.49331	9.6615	3.27225	0.477636	6.03816	12.6418	3.66013
Phvul.006G030200	0.238758	2.49239	10.439	3.38391	0.524042	2.93353	5.59789	2.48488
Phvul.006G053100	2.09407	5.25022	2.50718	1.32607	2.18949	5.20714	2.37824	1.2499
Phvul.006G068900	29.4964	131.346	4.45295	2.15476	30.9544	104.414	3.37316	1.7541
Phvul.006G074700	0	1.55389	ND	ND	0	1.72128	ND	ND
Phvul.006G075400	3.64351	8.66896	2.37929	1.25053	2.20576	9.2225	4.1811	2.06388
Phvul.006G075800	56.1382	371.893	6.6246	2.72783	138.858	345.19	2.48592	1.31378
Phvul.006G100500	4.31119	12.3265	2.85919	1.51561	4.29841	9.69999	2.25665	1.17418
Phvul.006G109000	25.5683	155.244	6.07174	2.60211	22.2785	53.3815	2.3961	1.26069
Phvul.006G117300	4.55466	12.9488	2.84298	1.5074	3.52389	19.0086	5.39421	2.43141
Phvul.006G126200	0	15.1715	ND	ND	0	12.8624	ND	ND
Phvul.006G136600	14.5224	36.9599	2.54503	1.34768	14.0704	30.5321	2.16995	1.11766
Phvul.006G148500	1.77109	8.80086	4.96918	2.31301	2.53808	7.7715	3.06196	1.61446
Phvul.006G165000	3.9145	13.632	3.48244	1.8001	3.44072	7.1217	2.06983	1.04951
Phvul.006G201100	4.09736	11.6734	2.84901	1.51046	1.74183	6.28927	3.61073	1.85229
Phvul.007G010500	0	0.983089	ND	ND	0	1.22146	ND	ND
Phvul.007G039200	6.3921	17.0697	2.67044	1.41708	6.6768	14.7194	2.20456	1.14049
Phvul.007G060800	6.25521	30.5229	4.8796	2.28676	8.0311	16.3786	2.0394	1.02814
Phvul.007G086600	2.95141	7.33944	2.48676	1.31427	3.70947	8.43167	2.27301	1.18461
Phvul.007G092000	1.28737	3.29355	2.55836	1.35522	1.09677	3.52295	3.21211	1.68352
Phvul.007G092400	0.98667	3.85898	3.91112	1.96758	1.28767	5.33825	4.14567	2.0516
Phvul.007G101600	0.162371	1.10457	6.80275	2.76612	0.125791	0.863808	6.86701	2.77968
Phvul.007G114000	5.6808	17.2316	3.03331	1.60089	4.57153	9.84166	2.15282	1.10622
Phvul.007G185701	1.95471	6.45998	3.30483	1.72458	0.543407	5.54143	10.1976	3.35015
Phvul.007G194000	22.2817	59.4624	2.66867	1.41612	21.7955	52.2856	2.39892	1.26238
Phvul.007G260700	1.13062	7.35066	6.50144	2.70076	1.13907	4.6817	4.11011	2.03918
Phvul.007G260800	9.7817	32.523	3.32488	1.7333	10.6384	24.4441	2.29772	1.20021
Phvul.008G001600	1.8209	4.25088	2.33449	1.22311	1.49999	4.02016	2.68012	1.4223
Phvul.008G002200	0.436896	1.1526	2.63816	1.39953	0.346141	1.13657	3.28355	1.71525
Phvul.008G007400	8.05275	18.3909	2.2838	1.19144	6.9602	17.2508	2.47849	1.30946
Phvul.008G008700	5.93348	13.4981	2.2749	1.18581	7.60435	18.8023	2.47257	1.30601
Phvul.008G009500	4.5742	36.7461	8.03334	3.006	3.6394	37.6271	10.3388	3.37
Phvul.008G032600	1.45107	7.47984	5.15471	2.36589	1.61615	4.08958	2.53045	1.33939
Phvul.008G042700	2.1121	12.8379	6.07826	2.60366	2.75206	10.0054	3.6356	1.8622
Phvul.008G049400	20.5484	83.9187	4.08395	2.02997	24.7818	54.914	2.2159	1.14789
Phvul.008G049500	11.8553	51.9013	4.3779	2.13024	15.1281	33.6056	2.2214	1.15147
Phvul.008G078500	5.30368	18.4213	3.47331	1.79631	5.6894	13.2763	2.33351	1.2225
Phvul.008G086800	6.50774	21.2817	3.27021	1.70938	5.99197	17.0752	2.84968	1.5108
Phvul.008G086900	1.59642	9.5418	5.977	2.57942	1.70758	9.68502	5.67178	2.5038
Phvul.008G088700	2.03208	8.36113	4.11457	2.04074	0	6.41	ND	ND
Phvul.008G094900	4.03981	11.4889	2.84392	1.50788	3.94379	8.94085	2.26707	1.18083
Phvul.008G100400	2.61288	6.97865	2.67087	1.41731	2.73251	5.65006	2.06772	1.04804
Phvul.008G116801	0	1.55597	ND	ND	0	1.45602	ND	ND
Phvul.008G152500	0.638649	1.51227	2.36792	1.24362	0.735227	1.97541	2.6868	1.42589
Phvul.008G184800	5.85324	24.1331	4.12303	2.04371	3.07907	19.536	6.34477	2.66557
Phvul.008G215700	0.870583	2.57249	2.9549	1.56311	0.773111	3.36168	4.34825	2.12043
Phvul.008G218500	0.313897	28.421	90.5424	6.50052	0.605748	25.1139	41.4593	5.37362
Phvul.008G220300	0.995437	5.37429	5.39893	2.43267	1.38691	8.01406	5.77836	2.53066
Phvul.008G222100	2.11847	11.6995	5.52262	2.46535	3.44339	9.3153	2.70527	1.43577
Phvul.008G244400	1.92367	15.209	7.90624	2.98299	1.51239	5.01959	3.31898	1.73074
Phvul.008G247600	8.30627	24.9585	3.00478	1.58726	7.7228	25.2894	3.27464	1.71134
Phvul.008G247700	3.19163	11.3811	3.56592	1.83427	2.36526	8.17675	3.45702	1.78953
Phvul.008G250600	2.3152	7.02605	3.03475	1.60158	2.4663	5.57701	2.26129	1.17714
Phvul.008G267600	9.14337	19.3031	2.11116	1.07803	5.29417	16.6284	3.14089	1.65117
Phvul.008G291800	1.66672	8.09119	4.85456	2.27934	2.81531	10.0038	3.55336	1.82918
Phvul.009G020600	18.8052	49.0293	2.60722	1.38251	17.2001	40.0014	2.32565	1.21763
Phvul.009G024301	19.6905	55.3639	2.81171	1.49145	1.96263	72.6935	37.0388	5.21097
Phvul.009G030700	2.9962	13.1853	4.40067	2.13772	2.80881	7.59741	2.70485	1.43555
Phvul.009G030800	7.21732	58.6398	8.12487	3.02235	7.40167	29.7658	4.0215	2.00773
Phvul.009G031300	1.389	3.41969	2.46198	1.29982	0.519875	1.51923	2.9223	1.5471
Phvul.009G031400	6.19192	16.6077	2.68216	1.42339	5.84543	14.1685	2.42386	1.27731
Phvul.009G068600	0	1.12922	ND	ND	0	1.96362	ND	ND
Phvul.009G076300	57.2806	226.224	3.9494	1.98163	71.7705	170.308	2.37295	1.24668
Phvul.009G109100	1.33512	7.1262	5.3375	2.41616	0.811574	2.94538	3.62922	1.85966
Phvul.009G115800	2.01598	4.19705	2.08189	1.05789	1.87244	4.88415	2.60844	1.38319
Phvul.009G119200	3.24207	12.3003	3.79396	1.92371	3.71209	14.3117	3.85543	1.94689
Phvul.009G127900	9.08281	30.7765	3.38843	1.76062	6.25384	14.8223	2.37011	1.24496
Phvul.009G134700	17.2109	36.2049	2.1036	1.07286	20.4282	43.9164	2.14979	1.1042
Phvul.009G189700	3.43262	15.2259	4.43565	2.14915	3.19191	7.96253	2.4946	1.31881
Phvul.009G203600	0	2.5263	ND	ND	0	3.68341	ND	ND
Phvul.009G229600	4.68288	15.1571	3.2367	1.69453	4.13981	12.3067	2.97277	1.57181
Phvul.009G231700	2.59893	5.20237	2.00174	1.00125	2.80983	5.97598	2.12681	1.08869
Phvul.009G234500	3.39237	7.62144	2.24664	1.16777	2.65644	5.85794	2.20518	1.1409
Phvul.009G244200	5.05008	12.4875	2.47273	1.30611	3.18746	8.87941	2.78573	1.47806
Phvul.009G245000	6.86615	36.655	5.33851	2.41644	7.80416	35.3085	4.52432	2.1777
Phvul.009G252800	2.88214	7.69897	2.67127	1.41753	4.16691	9.86031	2.36634	1.24266
Phvul.010G022400	1.06261	3.85087	3.62397	1.85757	0.256565	1.72536	6.72485	2.7495
Phvul.010G034400	1.12664	5.9497	5.28092	2.40079	2.59165	5.21349	2.01165	1.00838
Phvul.010G067746	1.8668	6.35543	3.40445	1.76742	1.31289	7.60134	5.78978	2.53351
Phvul.010G067900	13.4284	57.1093	4.25287	2.08844	13.3614	43.0243	3.22004	1.68708
Phvul.010G083300	4.42744	20.6781	4.67044	2.22356	3.51141	12.8138	3.64919	1.86758
Phvul.010G126200	0.127688	1.68856	13.2241	3.7251	0.115717	1.3475	11.6448	3.54161
Phvul.011G008000	146.44	299.574	2.04571	1.0326	20.7026	48.2426	2.33027	1.2205
Phvul.011G022300	104.024	366.018	3.51859	1.815	11.6449	279.517	24.0034	4.58517
Phvul.011G025400	2.35187	5.71372	2.42944	1.28062	2.02176	4.09728	2.02659	1.01905
Phvul.011G032800	1.34283	7.17742	5.345	2.41819	1.09927	7.87199	7.16111	2.84018
Phvul.011G044500	2.98659	6.38306	2.13724	1.09575	3.45721	7.27007	2.10287	1.07236
Phvul.011G046400	10.2874	79.6231	7.73987	2.95231	12.4349	27.2739	2.19333	1.13313
Phvul.011G057700	1.27892	3.92365	3.06794	1.61727	0.731213	2.20882	3.02076	1.59491
Phvul.011G060400	0.6277	13.4254	21.3882	4.41875	0.719524	9.15441	12.7229	3.66935
Phvul.011G081800	3.6988	7.42512	2.00744	1.00536	3.21415	6.80721	2.11789	1.08263
Phvul.011G101500	0.377578	2.18956	5.79896	2.53579	0.363816	3.57079	9.81482	3.29496
Phvul.011G110900	0.492055	1.58872	3.22874	1.69097	0.725572	2.40878	3.31984	1.73111
Phvul.011G122800	1.05352	9.68838	9.1962	3.20104	1.08988	3.37812	3.09953	1.63205
Phvul.011G134300	7.20726	20.5773	2.85508	1.51353	9.31744	21.0056	2.25444	1.17277
Phvul.011G139800	0.425585	2.78653	6.54753	2.71095	0.262652	3.09407	11.7801	3.55828
Phvul.011G199600	3.8643	9.54408	2.46981	1.3044	5.60088	14.4676	2.58309	1.3691
Phvul.011G199800	1.45632	3.95781	2.71768	1.44237	2.08906	7.7295	3.69999	1.88752
Phvul.011G206400	2.0993	4.61362	2.19769	1.13599	1.9445	3.93307	2.02266	1.01626
Phvul.L001653	1.8509	6.5281	3.52699	1.81844	1.8183	3.74608	2.06021	1.04279
Phvul.001G031400	22.3576	1.09774	0.0490992	-4.34816	16.1267	7.05147	0.437254	-1.19346
Phvul.001G061000	7.54921	2.6193	0.346963	-1.52714	6.93097	1.65062	0.238151	-2.07005
Phvul.001G147400	2.25474	0.751981	0.333511	-1.58419	2.85017	0.987788	0.346572	-1.52877
Phvul.001G153600	6.08829	0.544529	0.0894387	-3.48296	5.69897	1.20013	0.210587	-2.24751
Phvul.001G258900	20.9938	4.45944	0.212417	-2.23503	30.1863	8.21794	0.272241	-1.87705
Phvul.002G020200	50.9431	24.5645	0.482195	-1.05231	82.7946	40.7956	0.492733	-1.02112
Phvul.002G196050	185.357	86.3805	0.466022	-1.10153	153.489	68.2312	0.444535	-1.16963
Phvul.002G203800	188.236	31.879	0.169357	-2.56186	73.0294	27.947	0.382681	-1.38578
Phvul.002G211900	41.5411	2.70911	0.0652152	-3.93865	34.635	12.1896	0.351945	-1.50658
Phvul.002G260000	4.31793	1.69643	0.39288	-1.34784	5.47825	2.31618	0.422796	-1.24197
Phvul.003G010600	6.75087	0.342894	0.0507926	-4.29924	4.73795	1.37123	0.289414	-1.78879
Phvul.003G067400	98.9963	22.4216	0.226489	-2.14249	55.5944	18.8084	0.338315	-1.56356
Phvul.003G167700	2.94647	1.17012	0.397126	-1.33233	3.25015	0.965918	0.297192	-1.75053
Phvul.003G189500	4.47331	0.37204	0.0831688	-3.58781	4.37746	1.1534	0.263486	-1.9242
Phvul.003G248600	9.12939	0.603371	0.0660911	-3.9194	8.45109	2.21714	0.26235	-1.93044
Phvul.004G032300	1.16468	0.385019	0.330579	-1.59693	1.89369	0.553643	0.292362	-1.77417
Phvul.004G062400	104.534	37.5658	0.359364	-1.47648	127.669	57.8361	0.453016	-1.14237
Phvul.004G124200	75.6677	18.9806	0.250842	-1.99515	64.5748	25.532	0.395386	-1.33866
Phvul.004G158000	18.8154	5.55289	0.295125	-1.7606	57.8269	11.9774	0.207125	-2.27143
Phvul.005G016400	3.29594	1.23739	0.375429	-1.41339	5.58947	2.64855	0.473846	-1.07751
Phvul.005G088618	2.63003	0.339866	0.129225	-2.95204	2.63415	0.370535	0.140666	-2.82966
Phvul.005G104600	56.2812	13.4463	0.238913	-2.06544	42.4948	16.949	0.398849	-1.32609
Phvul.006G065000	4.11358	0.337673	0.0820874	-3.6067	3.34118	0.776274	0.232335	-2.10572
Phvul.006G077200	39.4946	18.3925	0.465697	-1.10254	39.7073	19.2209	0.484065	-1.04673
Phvul.006G154100	164.609	26.7132	0.162283	-2.62342	67.2447	26.1089	0.388267	-1.36488
Phvul.006G191200	9.60997	0.761038	0.0791925	-3.65849	6.03446	1.56266	0.258956	-1.94922
Phvul.006G202800	11.7775	0.978249	0.0830608	-3.58969	10.8109	3.7655	0.348306	-1.52157
Phvul.006G202900	19.7443	2.49837	0.126536	-2.98238	20.4143	6.78573	0.332401	-1.589
Phvul.006G203000	89.9121	6.53352	0.0726656	-3.78258	70.4309	28.6668	0.40702	-1.29683
Phvul.007G027100	0.99925	0.166541	0.166666	-2.58497	1.06968	0.315793	0.295222	-1.76013
Phvul.007G046400	4.05056	0.337197	0.083247	-3.58646	4.02659	1.61497	0.401076	-1.31805
Phvul.007G058600	8.79928	0.796435	0.0905114	-3.46576	7.65318	3.15183	0.411833	-1.27987
Phvul.007G092500	1.44153	0.588133	0.407992	-1.29339	1.69105	0.510167	0.301687	-1.72888
Phvul.007G103700	4.19171	0.260915	0.0622455	-4.00589	3.48037	0.891042	0.256019	-1.96568
Phvul.007G135500	16.3044	1.68719	0.103481	-3.27257	14.2034	5.40437	0.380498	-1.39404
Phvul.007G173500	20.6625	0.833147	0.0403217	-4.6323	16.2821	5.16631	0.3173	-1.65608
Phvul.008G001100	4.8324	1.12485	0.232773	-2.10301	4.83903	2.20065	0.454771	-1.13679
Phvul.008G058000	3.4835	0.432325	0.124107	-3.01035	3.77777	0.755102	0.19988	-2.32279
Phvul.008G094800	4.62582	2.13233	0.460963	-1.11728	3.97411	1.80557	0.454333	-1.13818
Phvul.008G123600	5.25413	0.550456	0.104766	-3.25475	3.3721	1.14078	0.3383	-1.56363
Phvul.008G179700	244.87	39.436	0.161049	-2.63443	93.972	28.206	0.300153	-1.73623
Phvul.008G192000	3.29517	0.313495	0.0951377	-3.39384	3.05982	1.17212	0.383068	-1.38433
Phvul.008G278800	10.9523	4.77778	0.436235	-1.19682	10.0598	4.96204	0.493254	-1.0196
Phvul.009G083300	9.4379	3.22919	0.342151	-1.54729	5.96405	2.80761	0.470756	-1.08695
Phvul.009G135400	4.24041	1.33803	0.315543	-1.66409	6.0602	1.85869	0.306704	-1.70508
Phvul.009G148300	7.97758	3.67207	0.460299	-1.11936	8.96657	4.17739	0.465885	-1.10195
Phvul.009G186800	6.4745	0.407562	0.0629488	-3.98968	4.82811	1.80859	0.374596	-1.41659
Phvul.009G218200	13.1934	1.05768	0.0801674	-3.64084	11.3871	2.14447	0.188325	-2.40871
Phvul.010G043400	12.0603	3.46334	0.287169	-1.80003	15.9016	4.56818	0.287278	-1.79948
Phvul.010G061500	4.68475	1.00888	0.215354	-2.21522	4.7154	1.11614	0.236701	-2.07886
Phvul.010G099900	1.70991	0.144208	0.0843366	-3.5677	1.57967	0.420925	0.266464	-1.90799
Phvul.010G151732	65.6444	21.0752	0.321051	-1.63913	59.7649	29.4169	0.49221	-1.02265
Phvul.011G119700	9.46412	0.446098	0.0471357	-4.40704	9.96583	3.85544	0.386866	-1.37009
Phvul.011G125800	8.46643	0.814381	0.0961894	-3.37798	12.2799	1.31116	0.106773	-3.22738
