# Supplementary material for: Phosphate Deficiency Negatively Affects Early Steps of the Symbiosis between Common Bean and Rhizobia
Source: Preprints.org preprint supplement (doi:10.20944/preprints201809.0207.v1), 2018-09-12
Supplement: Supplementary file 6 [file TableS5.xlsx]

## Sheet: Hoja1
Table S4: Genes uniquely regulated under optimal phosphate conditions
Gene ID	FPKM_Mock	FPKM_Rhizobia	Fold-Change	Log2Fold-Change
Phvul.002G068500	0	0.958608	ND	ND
Phvul.003G249500	0	0.805555	ND	ND
Phvul.005G032300	0	0.95024	ND	ND
Phvul.005G045800	0	2.49414	ND	ND
Phvul.005G052000	0	0.906525	ND	ND
Phvul.006G036144	0	5.44771	ND	ND
Phvul.009G180700	0	2.84413	ND	ND
Phvul.011G096800	0	0.871635	ND	ND
Phvul.011G197200	0	3.55148	ND	ND
Phvul.001G130900	0.272075	4.90428	18.0255	4.17197
Phvul.009G094600	0.198841	3.4908	17.5557	4.13387
Phvul.008G090500	0.0604467	1.03773	17.1677	4.10163
Phvul.011G083500	2.99215	43.048	14.387	3.84669
Phvul.011G092600	0.0570075	0.788615	13.8335	3.7901
Phvul.001G226900	3.23886	37.0004	11.4239	3.51399
Phvul.008G239400	0.548874	5.38096	9.80363	3.29332
Phvul.005G163600	0.383072	3.39038	8.8505	3.14576
Phvul.005G183400	0.66628	5.07633	7.61891	2.92958
Phvul.009G182900	0.104491	0.786552	7.52746	2.91216
Phvul.003G058000	0.313086	2.18652	6.98377	2.80401
Phvul.011G179500	0.913941	5.68396	6.21918	2.63672
Phvul.001G185100	0.202421	1.24206	6.13602	2.6173
Phvul.002G135900	2.83375	17.3067	6.10735	2.61055
Phvul.002G100001	1.17935	7.17055	6.08009	2.60409
Phvul.001G180300	0.168548	0.995455	5.90606	2.5622
Phvul.001G066550	0.343057	1.97029	5.74333	2.52189
Phvul.004G028900	0.297068	1.6325	5.49537	2.45821
Phvul.L002343	0.557928	2.96753	5.31884	2.41111
Phvul.005G132200	34.9014	182.154	5.2191	2.3838
Phvul.003G142300	0.983576	4.95739	5.04017	2.33347
Phvul.006G111111	4.7514	23.5162	4.94932	2.30723
Phvul.006G083600	3.44831	16.8479	4.88584	2.28861
Phvul.002G075600	21.9058	106.138	4.8452	2.27657
Phvul.005G093000	1.79186	8.61017	4.80516	2.26459
Phvul.006G069500	0.907811	4.3073	4.74471	2.24632
Phvul.008G044800	0.42561	2.00697	4.71551	2.23741
Phvul.001G246300	2.63608	12.3857	4.69853	2.23221
Phvul.008G032700	0.484042	2.23884	4.6253	2.20954
Phvul.009G130600	3.17491	14.5847	4.59374	2.19967
Phvul.002G181200	8.59623	37.992	4.41961	2.14392
Phvul.010G066800	2.97588	13.1206	4.40898	2.14045
Phvul.004G115800	4.54562	19.7079	4.33558	2.11623
Phvul.011G179600	3.45045	14.7011	4.26063	2.09107
Phvul.003G057900	11.2993	47.9822	4.24648	2.08627
Phvul.009G257600	0.343716	1.4574	4.24013	2.0841
Phvul.010G002500	12.0464	50.9896	4.23277	2.0816
Phvul.001G201300	36.394	151.111	4.15209	2.05383
Phvul.001G235000	1.02536	4.08523	3.98419	1.99429
Phvul.001G209100	0.825333	3.28201	3.97659	1.99153
Phvul.003G057801	31.062	122.636	3.9481	1.98116
Phvul.008G116500	2.4442	9.5113	3.89138	1.96028
Phvul.008G171400	0.537771	2.08953	3.88554	1.95812
Phvul.007G254600	0.97354	3.70327	3.80392	1.92749
Phvul.006G133400	4.50924	17.132	3.79931	1.92574
Phvul.010G027601	0.876937	3.3047	3.76846	1.91398
Phvul.002G070600	0.354033	1.32857	3.75267	1.90791
Phvul.007G064500	10.5226	39.3878	3.74316	1.90426
Phvul.010G002600	1.20783	4.50844	3.73268	1.90022
Phvul.001G145400	2.03943	7.55433	3.70414	1.88914
Phvul.002G272500	8.67807	32.1225	3.70157	1.88814
Phvul.004G105800	0.323451	1.19223	3.68597	1.88204
Phvul.002G293200	2.40352	8.77187	3.64959	1.86773
Phvul.004G106500	1.38365	5.04778	3.64816	1.86718
Phvul.009G052700	35.0945	125.777	3.58395	1.84155
Phvul.010G014300	2.39421	8.57005	3.57949	1.83975
Phvul.011G098800	0.225208	0.804182	3.57084	1.83627
Phvul.002G032400	7.7462	27.6352	3.56758	1.83495
Phvul.008G056900	0.752528	2.68395	3.56658	1.83454
Phvul.008G178100	2.69745	9.60805	3.5619	1.83265
Phvul.002G196200	0.383079	1.36129	3.55355	1.82926
Phvul.008G127374	0.909231	3.22122	3.5428	1.82489
Phvul.011G074900	1.3347	4.69373	3.51669	1.81422
Phvul.006G112600	3.49509	12.1806	3.48506	1.80118
Phvul.001G055000	0.603857	2.09931	3.4765	1.79764
Phvul.004G106600	0.308988	1.07193	3.46916	1.79459
Phvul.008G088400	17.2779	59.7779	3.45979	1.79068
Phvul.008G126800	1.25012	4.27263	3.41778	1.77306
Phvul.003G255300	4.68513	15.7271	3.35681	1.74709
Phvul.004G135200	1.17023	3.9223	3.35173	1.74491
Phvul.002G264300	4.87088	16.3059	3.34763	1.74314
Phvul.003G227500	1.33681	4.47055	3.34419	1.74166
Phvul.004G138600	1.66839	5.57062	3.33892	1.73938
Phvul.008G073700	1.26287	4.19798	3.32416	1.73299
Phvul.004G098000	0.935993	3.10951	3.32215	1.73212
Phvul.002G184400	0.952993	3.16595	3.32211	1.7321
Phvul.006G140200	3.97347	13.1202	3.30195	1.72332
Phvul.006G079700	1.05971	3.47909	3.28306	1.71504
Phvul.011G058900	90.4571	296.742	3.28047	1.7139
Phvul.002G279900	7.14614	23.3348	3.26537	1.70725
Phvul.008G044900	1.71181	5.57212	3.2551	1.7027
Phvul.003G160800	3.20077	10.3678	3.23916	1.69561
Phvul.011G020400	48.9966	158.025	3.22522	1.6894
Phvul.005G040100	1.65342	5.32674	3.22165	1.6878
Phvul.005G068200	0.424316	1.35712	3.19837	1.67733
Phvul.004G124700	1.04448	3.32219	3.18071	1.66935
Phvul.003G194600	1.48863	4.73346	3.17974	1.66891
Phvul.008G001500	57.9209	183.424	3.1668	1.66303
Phvul.008G250700	13.4538	42.4741	3.15703	1.65857
Phvul.008G101300	3.58747	11.3172	3.15465	1.65748
Phvul.008G033200	2.89042	9.07833	3.14083	1.65115
Phvul.007G076700	8.21585	25.7307	3.13184	1.64701
Phvul.009G062200	7.79674	24.3509	3.12322	1.64303
Phvul.003G065600	1.17654	3.66813	3.11773	1.64049
Phvul.010G158100	5.02892	15.605	3.10305	1.63369
Phvul.004G177200	3.75094	11.5432	3.07742	1.62172
Phvul.003G001800	1.02091	3.13554	3.07132	1.61885
Phvul.008G035900	0.288495	0.880564	3.05227	1.60988
Phvul.009G240677	0.830563	2.52581	3.04108	1.60459
Phvul.L005901	8.50432	25.8389	3.03833	1.60328
Phvul.001G050300	1.35372	4.11253	3.03795	1.6031
Phvul.003G177700	4.73813	14.2845	3.0148	1.59206
Phvul.008G220600	10.2187	30.7946	3.01355	1.59146
Phvul.003G134600	16.5813	49.8673	3.00744	1.58854
Phvul.002G025200	9.08559	27.2426	2.99844	1.58421
Phvul.003G229000	16.3492	48.6376	2.97492	1.57286
Phvul.001G145900	13.1527	39.1009	2.97284	1.57184
Phvul.009G097200	1.21933	3.60383	2.95558	1.56344
Phvul.001G140100	5.22922	15.4194	2.9487	1.56008
Phvul.007G276100	71.7648	211.258	2.94376	1.55765
Phvul.011G099400	1.42815	4.20099	2.94156	1.55658
Phvul.004G048800	1.14084	3.33223	2.92086	1.54639
Phvul.005G032000	3.05679	8.9152	2.91652	1.54425
Phvul.002G177000	3.56728	10.3882	2.91208	1.54204
Phvul.007G250000	47.7686	139.092	2.91179	1.54191
Phvul.011G086200	18.4793	53.7691	2.90969	1.54087
Phvul.005G162100	1.56921	4.56172	2.90702	1.53954
Phvul.003G012800	6.57086	19.0945	2.90594	1.539
Phvul.002G159000	1.32696	3.84309	2.89616	1.53414
Phvul.002G219600	0.665798	1.92807	2.89588	1.534
Phvul.001G259900	15.0018	43.3145	2.88729	1.52972
Phvul.008G092400	8.02375	23.0716	2.87541	1.52377
Phvul.010G143100	0.946517	2.72053	2.87425	1.52319
Phvul.003G070900	0.632498	1.81199	2.86482	1.51844
Phvul.008G144300	0.705216	2.01954	2.86372	1.51789
Phvul.009G198800	4.96813	14.2241	2.86307	1.51756
Phvul.011G033650	7.9737	22.812	2.86091	1.51647
Phvul.006G196900	105.309	296.634	2.8168	1.49406
Phvul.007G093600	0.627626	1.76398	2.81056	1.49086
Phvul.005G130500	34.4075	95.4197	2.77322	1.47157
Phvul.009G257400	16.1092	44.6623	2.77247	1.47117
Phvul.002G049301	0.816588	2.26316	2.77148	1.47065
Phvul.003G093100	2.84864	7.88707	2.76871	1.46921
Phvul.009G145900	4.69876	12.9674	2.75975	1.46453
Phvul.011G095500	0.654171	1.80374	2.75729	1.46325
Phvul.006G169300	17.4491	47.9197	2.74626	1.45747
Phvul.001G197000	4.49259	12.2783	2.73301	1.45049
Phvul.002G019800	30.4412	83.1087	2.73014	1.44897
Phvul.004G076400	39.9651	108.222	2.70791	1.43718
Phvul.011G068800	5.09638	13.764	2.70074	1.43335
Phvul.005G079600	9.18414	24.6464	2.68358	1.42416
Phvul.004G096500	11.0484	29.5948	2.67865	1.42151
Phvul.006G086200	4.37008	11.7043	2.67828	1.42131
Phvul.007G039200	6.3921	17.0697	2.67044	1.41707
Phvul.001G032600	4.70812	12.5382	2.6631	1.41311
Phvul.002G140800	4.88059	12.9394	2.6512	1.40664
Phvul.008G147800	116.082	302.544	2.6063	1.382
Phvul.011G147000	4.54026	11.7945	2.59776	1.37727
Phvul.003G053500	10.4414	27.0134	2.58714	1.37136
Phvul.002G030100	3.67146	9.44872	2.57356	1.36377
Phvul.003G080700	18.343	47.1677	2.57143	1.36257
Phvul.011G200840	1.53935	3.93827	2.5584	1.35524
Phvul.002G092200	55.0574	140.786	2.55708	1.35449
Phvul.003G136500	4.46964	11.4272	2.55663	1.35424
Phvul.003G192000	5.13987	13.1092	2.55049	1.35078
Phvul.009G069500	6.24899	15.9256	2.54851	1.34965
Phvul.004G071700	3.61275	9.16747	2.53753	1.34342
Phvul.006G125300	0.887382	2.244	2.52879	1.33845
Phvul.002G007500	0.782203	1.97157	2.52053	1.33373
Phvul.004G115700	0.525642	1.31793	2.50728	1.32612
Phvul.011G086600	1.23866	3.10003	2.50273	1.32351
Phvul.007G028200	7.10759	17.7773	2.50117	1.32261
Phvul.005G089400	5.93383	14.8383	2.50063	1.32229
Phvul.009G136500	3.11858	7.7815	2.49521	1.31916
Phvul.005G116450	1.15518	2.88226	2.49507	1.31908
Phvul.009G136000	29.2582	72.9311	2.49267	1.31769
Phvul.006G144900	26.2977	65.5356	2.49207	1.31734
Phvul.011G050100	0.800885	1.9782	2.47002	1.30452
Phvul.011G060300	0.6766	1.67031	2.46868	1.30374
Phvul.002G075900	13.5454	33.3708	2.46363	1.30078
Phvul.001G126400	8.73735	21.5202	2.46301	1.30042
Phvul.003G109602	1.99086	4.89988	2.46119	1.29936
Phvul.008G068600	1.77876	4.36679	2.45496	1.2957
Phvul.006G127400	41.5731	101.557	2.44285	1.28857
Phvul.007G096100	3.47806	8.49334	2.44198	1.28805
Phvul.009G109200	2.68301	6.50438	2.42428	1.27756
Phvul.011G160700	6.63696	16.0744	2.42195	1.27617
Phvul.006G180200	15.9149	38.478	2.41773	1.27366
Phvul.005G077400	0.609215	1.47034	2.4135	1.27113
Phvul.008G250300	50.8822	122.789	2.4132	1.27095
Phvul.001G209300	14.7256	35.2997	2.39717	1.26133
Phvul.010G094000	10.0116	23.9906	2.39628	1.26079
Phvul.011G181366	1.79223	4.28558	2.3912	1.25774
Phvul.007G123958	15.1889	36.2827	2.38876	1.25627
Phvul.009G172001	18.9187	45.1588	2.38699	1.25519
Phvul.001G163800	0.443445	1.05758	2.38492	1.25393
Phvul.003G056100	2.49333	5.94418	2.38403	1.2534
Phvul.009G133500	24.9628	59.4206	2.38037	1.25119
Phvul.007G195000	9.35496	22.2206	2.37527	1.2481
Phvul.001G078900	2.23769	5.31499	2.37521	1.24806
Phvul.011G215600	0.87132	2.06947	2.3751	1.24799
Phvul.008G062600	1.286	3.04504	2.36784	1.24357
Phvul.009G190000	2.51902	5.95195	2.3628	1.2405
Phvul.001G243500	0.740126	1.74626	2.35941	1.23842
Phvul.003G127500	365.161	861.489	2.3592	1.2383
Phvul.001G107900	7.94233	18.7221	2.35726	1.2371
Phvul.001G236600	18.712	44.105	2.35704	1.23698
Phvul.003G287101	0.540719	1.27069	2.35	1.23266
Phvul.003G130400	8.70791	20.4557	2.34909	1.2321
Phvul.003G166600	1.48761	3.48948	2.3457	1.23001
Phvul.006G196700	5.38839	12.6225	2.34254	1.22807
Phvul.010G129400	3.84198	8.97265	2.33542	1.22368
Phvul.001G110500	61.3108	142.594	2.32576	1.2177
Phvul.007G170100	3.62713	8.41594	2.32028	1.2143
Phvul.010G120200	9.64777	22.2968	2.31108	1.20857
Phvul.002G249800	56.4765	130.517	2.311	1.20851
Phvul.008G059700	12.9103	29.7542	2.30469	1.20457
Phvul.002G020900	47.9986	109.709	2.28567	1.19261
Phvul.009G068100	9.0117	20.5641	2.28193	1.19026
Phvul.005G112500	141.142	322.02	2.28153	1.19001
Phvul.003G264600	3.49214	7.96013	2.27944	1.18868
Phvul.003G125000	23.524	53.4954	2.27408	1.18528
Phvul.006G150600	3.83436	8.68207	2.26428	1.17905
Phvul.009G131100	4.19356	9.48083	2.26081	1.17684
Phvul.010G150300	6.52145	14.7315	2.25893	1.17564
Phvul.003G062800	1.70584	3.85244	2.25838	1.17529
Phvul.001G169300	3.34888	7.55487	2.25594	1.17373
Phvul.003G203300	1.40218	3.16142	2.25465	1.1729
Phvul.011G182800	4.20202	9.47231	2.25423	1.17263
Phvul.003G290600	1.91186	4.30325	2.25082	1.17045
Phvul.011G024700	5.48071	12.3165	2.24725	1.16815
Phvul.004G029500	6.83791	15.3663	2.24722	1.16814
Phvul.009G172100	7.52822	16.8937	2.24405	1.16611
Phvul.005G008300	11.4841	25.7222	2.23981	1.16338
Phvul.004G018000	1.05341	2.35257	2.23329	1.15917
Phvul.006G194100	1.71903	3.83888	2.23317	1.15909
Phvul.007G167200	59.408	132.452	2.22953	1.15674
Phvul.003G087900	3.27396	7.29382	2.22783	1.15564
Phvul.L002132	5.50465	12.2495	2.2253	1.154
Phvul.010G058800	3.22437	7.16841	2.2232	1.15264
Phvul.007G225100	36.5997	80.9416	2.21154	1.14505
Phvul.009G220700	2.94797	6.51197	2.20897	1.14337
Phvul.011G165700	7.57347	16.7114	2.20657	1.1418
Phvul.011G030000	1.10002	2.42717	2.20648	1.14175
Phvul.007G049300	3.86728	8.52326	2.20394	1.14008
Phvul.010G048700	14.468	31.8856	2.20387	1.14004
Phvul.008G285000	2.42071	5.32908	2.20145	1.13846
Phvul.001G190500	5.57318	12.2574	2.19935	1.13707
Phvul.005G015100	1.704	3.74093	2.19538	1.13447
Phvul.001G139500	1.09744	2.40732	2.19358	1.13328
Phvul.003G009200	19.7717	43.3602	2.19304	1.13293
Phvul.010G089600	0.987364	2.16506	2.19277	1.13275
Phvul.011G153400	39.1598	85.7189	2.18895	1.13024
Phvul.003G253000	7.43372	16.2604	2.18738	1.12921
Phvul.010G087800	2.01751	4.40163	2.18171	1.12546
Phvul.009G228300	26.9208	58.7088	2.1808	1.12485
Phvul.001G225000	9.90031	21.5791	2.17964	1.12409
Phvul.010G104200	1.18684	2.57695	2.17127	1.11854
Phvul.001G251900	22.6012	49.0173	2.16879	1.11689
Phvul.010G066500	10.1172	21.7727	2.15205	1.10571
Phvul.007G195100	2.83753	6.10332	2.15093	1.10496
Phvul.008G093500	9.38045	20.1317	2.14613	1.10174
Phvul.007G076300	14.6549	31.4084	2.1432	1.09977
Phvul.001G163700	0.489692	1.04684	2.13775	1.09609
Phvul.009G042400	23.0046	49.052	2.13227	1.09239
Phvul.002G077100	1.62157	3.45368	2.12984	1.09075
Phvul.010G117500	12.7888	27.2268	2.12896	1.09015
Phvul.008G048600	2.93362	6.24353	2.12827	1.08968
Phvul.009G029800	7.82911	16.6603	2.12799	1.08949
Phvul.008G146000	1.63247	3.47379	2.12793	1.08945
Phvul.005G099300	5.08832	10.8268	2.12777	1.08935
Phvul.006G005400	3.76318	7.99922	2.12565	1.08791
Phvul.003G169100	3.18083	6.74965	2.12198	1.08541
Phvul.002G049400	6.87778	14.5891	2.12119	1.08488
Phvul.003G218900	209.02	441.665	2.11303	1.07931
Phvul.001G196400	3.38539	7.15292	2.11288	1.07921
Phvul.011G161100	19.0998	40.2354	2.10659	1.07491
Phvul.002G159400	4.92066	10.3599	2.10539	1.07409
Phvul.007G082700	3.13333	6.58598	2.10191	1.0717
Phvul.009G132200	45.3956	95.3941	2.1014	1.07135
Phvul.001G155201	4.92803	10.3371	2.09761	1.06875
Phvul.003G147300	2.84547	5.96362	2.09583	1.06752
Phvul.007G049400	12.4915	26.1635	2.0945	1.06661
Phvul.001G160600	44.2222	92.5437	2.0927	1.06536
Phvul.001G071500	2.80777	5.87207	2.09136	1.06445
Phvul.010G160800	6.65403	13.8956	2.0883	1.06233
Phvul.003G283900	0.889092	1.8558	2.0873	1.06164
Phvul.007G196100	13.6383	28.4404	2.08533	1.06027
Phvul.008G238100	7.39559	15.3853	2.08033	1.05682
Phvul.004G049800	8.85467	18.4169	2.07991	1.05652
Phvul.008G015100	4.42131	9.16592	2.07312	1.05181
Phvul.011G071000	65.5615	135.872	2.07244	1.05133
Phvul.008G261500	19.1553	39.6701	2.07097	1.05031
Phvul.007G047700	11.5061	23.809	2.06925	1.04911
Phvul.007G227100	5.15885	10.6595	2.06626	1.04702
Phvul.003G248025	2.44796	5.05209	2.0638	1.0453
Phvul.010G026300	1.61561	3.33331	2.06319	1.04488
Phvul.003G227700	18.258	37.5884	2.05874	1.04176
Phvul.003G218800	98.6716	203.064	2.05798	1.04123
Phvul.001G251600	2.02849	4.16568	2.05359	1.03815
Phvul.005G021900	14.6712	30.0954	2.05133	1.03656
Phvul.006G101600	66.1773	135.443	2.04667	1.03328
Phvul.007G081400	6.86817	14.0462	2.04512	1.03218
Phvul.006G187700	4.24819	8.68802	2.04511	1.03218
Phvul.010G062200	5.62228	11.4845	2.04268	1.03045
Phvul.003G192700	22.3825	45.7006	2.0418	1.02984
Phvul.003G233000	12.6075	25.7352	2.04126	1.02946
Phvul.008G152200	4.83071	9.85533	2.04014	1.02867
Phvul.003G030601	6.74992	13.7689	2.03986	1.02847
Phvul.005G077600	3.36065	6.84879	2.03794	1.02711
Phvul.005G078500	15.0346	30.6185	2.03654	1.02612
Phvul.004G103900	8.56779	17.4264	2.03394	1.02428
Phvul.009G256400	108.267	220.208	2.03393	1.02427
Phvul.009G251600	30.2594	61.4833	2.03187	1.02281
Phvul.002G061900	45.0996	91.5129	2.02913	1.02086
Phvul.009G024700	42.7768	86.7995	2.02913	1.02086
Phvul.002G163500	25.8338	52.414	2.02889	1.02069
Phvul.010G060200	6.49683	13.1805	2.02876	1.0206
Phvul.002G111300	78.8622	159.907	2.02768	1.01983
Phvul.002G286000	2.15565	4.36036	2.02276	1.01632
Phvul.003G292900	50.7711	102.645	2.02172	1.01559
Phvul.010G065400	6.51792	13.1711	2.02075	1.0149
Phvul.010G054200	12.3385	24.9038	2.01838	1.0132
Phvul.011G181432	2.64555	5.33863	2.01797	1.0129
Phvul.004G136300	11.9723	24.1489	2.01706	1.01226
Phvul.011G100800	21.742	43.8445	2.01658	1.01191
Phvul.009G262900	1.31508	2.64598	2.01203	1.00864
Phvul.006G116100	4.35431	8.75073	2.00967	1.00696
Phvul.007G218700	105.475	211.964	2.00961	1.00691
Phvul.006G129800	136.602	274.114	2.00666	1.0048
Phvul.008G041100	196.468	393.74	2.00409	1.00295
Phvul.003G246200	22.6944	45.4606	2.00316	1.00228
Phvul.001G000800	5.14979	0.819864	0.159203	-2.65106
Phvul.001G004400	2.86671	1.14621	0.399835	-1.32252
Phvul.001G053900	10.1335	4.60462	0.454396	-1.13798
Phvul.001G064100	1.54183	0.304985	0.197807	-2.33784
Phvul.001G067300	3.37205	1.55614	0.461482	-1.11566
Phvul.001G075400	84.9801	18.1879	0.214025	-2.22415
Phvul.001G077000	35.4096	12.8872	0.363947	-1.4582
Phvul.001G087300	3.42967	1.26404	0.36856	-1.44003
Phvul.001G089700	30.6003	10.9704	0.358506	-1.47993
Phvul.001G092000	4.77447	1.96089	0.410703	-1.28384
Phvul.001G098300	159.088	69.1116	0.434424	-1.20283
Phvul.001G129300	4.15455	1.47342	0.354652	-1.49552
Phvul.001G140700	6.80484	3.12018	0.458524	-1.12493
Phvul.001G142000	11.8856	0.524201	0.0441039	-4.50295
Phvul.001G147900	15.3133	7.11888	0.464882	-1.10506
Phvul.001G157300	5.04543	1.9111	0.378778	-1.40057
Phvul.001G161700	3.37393	0.909918	0.269691	-1.89062
Phvul.001G176100	35.7138	15.0914	0.422565	-1.24275
Phvul.001G182300	7.48243	3.20644	0.428529	-1.22253
Phvul.001G207900	33.4306	12.2237	0.365644	-1.45149
Phvul.001G209600	73.6451	32.3095	0.438719	-1.18863
Phvul.001G213401	3.85577	1.86546	0.48381	-1.04748
Phvul.001G218700	4.4207	0.942585	0.213221	-2.22958
Phvul.001G238300	4.79768	1.71751	0.357988	-1.48202
Phvul.001G255000	10.5958	4.04471	0.381728	-1.38938
Phvul.001G263200	74.3496	33.9247	0.456286	-1.13199
Phvul.002G004300	59.3796	25.8342	0.435069	-1.20069
Phvul.002G013800	2.82056	1.33098	0.471885	-1.08349
Phvul.002G016500	13.3626	4.8456	0.362624	-1.46345
Phvul.002G018600	4.39037	1.36253	0.310345	-1.68805
Phvul.002G040900	3.41747	0.363103	0.106249	-3.23448
Phvul.002G060750	3.42828	1.46768	0.42811	-1.22395
Phvul.002G082100	3.51849	0.655283	0.18624	-2.42477
Phvul.002G082300	1.87555	0.709903	0.378504	-1.40162
Phvul.002G088400	6.09382	2.39889	0.393659	-1.34498
Phvul.002G090301	13.8939	6.49298	0.467326	-1.0975
Phvul.002G090544	12.1108	ND	ND	ND
Phvul.002G116651	12.3658	4.08786	0.330578	-1.59694
Phvul.002G122800	3.19601	1.5094	0.472276	-1.0823
Phvul.002G160600	2.12494	0.774385	0.364427	-1.4563
Phvul.002G160700	23.6882	9.61589	0.405936	-1.30068
Phvul.002G163900	2.23608	0.942698	0.421585	-1.2461
Phvul.002G167100	44.3452	22.0052	0.496225	-1.01094
Phvul.002G179966	41.4171	12.8119	0.309338	-1.69274
Phvul.002G180032	64.391	14.0378	0.218009	-2.19754
Phvul.002G189200	6.06142	2.62475	0.433026	-1.20747
Phvul.002G199200	1.67045	0.476318	0.285144	-1.81024
Phvul.002G200600	1.4364	0.282005	0.196328	-2.34866
Phvul.002G213000	20.2777	7.85093	0.387171	-1.36896
Phvul.002G240200	4.06975	0.66812	0.164167	-2.60676
Phvul.002G241600	15.6786	5.85147	0.373214	-1.42193
Phvul.002G241700	30.526	12.4966	0.409376	-1.2885
Phvul.002G266800	3.4375	0.728284	0.211864	-2.23879
Phvul.002G272600	3.97141	0.411975	0.103735	-3.26902
Phvul.002G278116	2.49557	1.02189	0.409482	-1.28812
Phvul.002G295500	6.44377	0.970808	0.150658	-2.73065
Phvul.002G309100	12.2845	6.09043	0.495782	-1.01223
Phvul.002G316500	1.03161	0.235336	0.228125	-2.13211
Phvul.002G319400	5.86777	0.963168	0.164145	-2.60695
Phvul.002G332300	1.67556	0.580032	0.346172	-1.53044
Phvul.003G007900	4.06863	1.97724	0.485972	-1.04105
Phvul.003G020200	3.8684	1.68119	0.434596	-1.20225
Phvul.003G020700	5.54633	1.04858	0.189058	-2.4031
Phvul.003G020800	83.6061	33.6892	0.402951	-1.31132
Phvul.003G025000	1.67051	0.386545	0.231393	-2.11158
Phvul.003G029400	2.08044	0.748744	0.359897	-1.47434
Phvul.003G039000	0.959834	0.282153	0.29396	-1.76631
Phvul.003G060700	1.17179	0.291402	0.248681	-2.00764
Phvul.003G062400	2.9196	1.32854	0.455042	-1.13593
Phvul.003G079800	8.15035	2.77011	0.339876	-1.55692
Phvul.003G086700	20.7052	8.40256	0.405819	-1.30109
Phvul.003G096700	512.872	67.269	0.131161	-2.93059
Phvul.003G100400	10.257	4.9444	0.482051	-1.05275
Phvul.003G106302	3.80289	0.744146	0.195679	-2.35344
Phvul.003G117100	11.5811	2.93512	0.253441	-1.98028
Phvul.003G120900	5.35879	0.941054	0.175609	-2.50956
Phvul.003G139400	7.4596	3.44366	0.461641	-1.11516
Phvul.003G140426	23.4935	10.4264	0.443799	-1.17202
Phvul.003G148900	0.919438	0.155477	0.1691	-2.56405
Phvul.003G151400	4.29245	1.1364	0.264744	-1.91733
Phvul.003G153100	1.91557	0.323646	0.168955	-2.56529
Phvul.003G154800	0.840016	0.287908	0.342741	-1.54481
Phvul.003G164000	57.1728	8.58171	0.150101	-2.73599
Phvul.003G170000	5.5163	2.23752	0.40562	-1.3018
Phvul.003G189000	71.0261	27.2328	0.38342	-1.383
Phvul.003G203900	5.16994	2.17343	0.420398	-1.25018
Phvul.003G206100	2.05078	0.594287	0.289786	-1.78694
Phvul.003G207000	13.3185	3.83978	0.288304	-1.79434
Phvul.003G212900	5.37799	2.41616	0.449268	-1.15435
Phvul.003G225100	7.3065	2.89788	0.396617	-1.33418
Phvul.003G232400	5.74345	2.2619	0.393823	-1.34438
Phvul.003G236000	3.52632	1.13332	0.321389	-1.63761
Phvul.003G237400	48.0426	8.56847	0.178352	-2.4872
Phvul.003G238700	3.70574	1.61794	0.436604	-1.1956
Phvul.003G243350	7.06364	2.44529	0.34618	-1.53041
Phvul.003G245601	12.6778	6.13972	0.484289	-1.04606
Phvul.003G274800	1.5018	0.333405	0.222004	-2.17135
Phvul.003G293200	12.139	5.98309	0.492882	-1.02069
Phvul.003G293300	7.58116	3.55566	0.469013	-1.0923
Phvul.003G293600	1.20611	0.316131	0.262108	-1.93177
Phvul.004G011800	24.6667	9.78842	0.396827	-1.33342
Phvul.004G014666	24.314	9.53563	0.392187	-1.35039
Phvul.004G023200	2.15469	0.52459	0.243464	-2.03822
Phvul.004G042900	7.80101	3.58688	0.459797	-1.12093
Phvul.004G056400	10.0295	1.39387	0.138977	-2.84709
Phvul.004G068800	6.0855	0.804708	0.132234	-2.91884
Phvul.004G113000	2.68079	0.645285	0.240707	-2.05465
Phvul.004G119300	6.30892	0.506438	0.0802733	-3.63893
Phvul.004G119400	4.28559	1.23323	0.287762	-1.79705
Phvul.004G121666	2.31602	1.13053	0.488135	-1.03465
Phvul.004G123200	5.72058	2.65649	0.464374	-1.10664
Phvul.004G132600	6.18539	2.98212	0.482123	-1.05253
Phvul.004G144400	4.1586	0.715383	0.172025	-2.53931
Phvul.004G146600	10.4428	2.65138	0.253896	-1.97769
Phvul.005G002600	9.76947	1.52084	0.155673	-2.68341
Phvul.005G004000	9.55034	3.66747	0.384015	-1.38077
Phvul.005G012400	4.7866	1.30881	0.273432	-1.87075
Phvul.005G027032	41.0444	8.69653	0.211881	-2.23867
Phvul.005G030200	11.7374	4.68673	0.399299	-1.32446
Phvul.005G032600	2.73056	0.514156	0.188297	-2.40892
Phvul.005G037800	12.7044	6.32825	0.498115	-1.00545
Phvul.005G038400	24.6794	8.55421	0.346613	-1.5286
Phvul.005G038700	32.339	10.9617	0.338962	-1.5608
Phvul.005G042200	12.6946	6.34529	0.499842	-1.00046
Phvul.005G045100	4.96444	1.53191	0.308577	-1.6963
Phvul.005G054200	30.1558	13.4833	0.447121	-1.16126
Phvul.005G084500	39.5992	12.8868	0.325431	-1.61958
Phvul.005G087400	3.18832	0.377323	0.118345	-3.07892
Phvul.005G087600	2.21249	0.298622	0.134971	-2.88928
Phvul.005G088400	2.81842	0.678037	0.240573	-2.05545
Phvul.005G088454	241.819	49.2384	0.203617	-2.29607
Phvul.005G088500	4.10609	ND	ND	ND
Phvul.005G088636	8.68069	2.03588	0.23453	-2.09216
Phvul.005G094000	3.38013	1.43149	0.423501	-1.23956
Phvul.005G096400	15.814	6.13198	0.387756	-1.36678
Phvul.005G108500	5.30471	2.241	0.422455	-1.24313
Phvul.005G108600	3.16295	1.01901	0.322171	-1.6341
Phvul.005G119300	1.27874	0.530296	0.414702	-1.26985
Phvul.005G135955	2.46061	0.241168	0.0980115	-3.35091
Phvul.005G151700	45.0446	12.6874	0.281663	-1.82796
Phvul.005G151800	103.37	36.0857	0.349093	-1.51831
Phvul.005G154200	47.0298	5.56399	0.118308	-3.07938
Phvul.005G156900	810.427	268.541	0.331357	-1.59354
Phvul.005G171800	9.00999	4.19194	0.465255	-1.10391
Phvul.005G181400	6.90065	2.18804	0.317077	-1.65709
Phvul.006G001200	336.474	157.032	0.466699	-1.09944
Phvul.006G022150	1.64924	0.248887	0.15091	-2.72824
Phvul.006G022300	5.19974	2.51619	0.483907	-1.0472
Phvul.006G030900	2.07255	0.939357	0.453237	-1.14166
Phvul.006G039800	5.36211	1.40622	0.262251	-1.93098
Phvul.006G045500	5331.39	2496.72	0.468306	-1.09448
Phvul.006G053900	1.50906	0.725732	0.480917	-1.05614
Phvul.006G075000	2.19481	0.86842	0.39567	-1.33763
Phvul.006G079500	7.17228	2.25815	0.314844	-1.66729
Phvul.006G094400	20.2454	9.86923	0.48748	-1.03658
Phvul.006G117011	16.0341	5.52441	0.344541	-1.53725
Phvul.006G130100	2.21031	0.263884	0.119388	-3.06628
Phvul.006G159000	4.21626	0.976629	0.231634	-2.11008
Phvul.006G161500	3.73925	1.40004	0.374417	-1.41728
Phvul.006G166000	10.1852	2.51029	0.246464	-2.02054
Phvul.006G172100	8.71356	3.4789	0.399251	-1.32463
Phvul.006G186600	12.3389	5.89676	0.4779	-1.06522
Phvul.006G188900	1.79292	0.628919	0.350779	-1.51136
Phvul.006G192900	7.94625	2.07293	0.260869	-1.9386
Phvul.006G194900	10.847	2.66033	0.24526	-2.02762
Phvul.006G197400	21.4559	UD	UD	UD
Phvul.006G202300	2.19257	0.590509	0.269323	-1.89259
Phvul.006G210800	2.77865	0.78607	0.282896	-1.82165
Phvul.006G216900	21.6786	10.6121	0.48952	-1.03056
Phvul.007G008200	1.81756	0.302768	0.166579	-2.58572
Phvul.007G035600	17.2987	0.983053	0.0568281	-4.13725
Phvul.007G036400	165.458	5.56181	0.0336146	-4.89477
Phvul.007G045800	7.29577	3.03843	0.416465	-1.26373
Phvul.007G057600	42.2408	19.6705	0.465675	-1.1026
Phvul.007G058500	5.50027	0.707115	0.12856	-2.95948
Phvul.007G060300	23.6984	9.75984	0.411835	-1.27986
Phvul.007G064400	77.9102	36.4266	0.467546	-1.09682
Phvul.007G065200	7.6712	3.56161	0.464283	-1.10692
Phvul.007G069800	3.38469	0.74909	0.221317	-2.17581
Phvul.007G101400	6.92156	3.24914	0.469423	-1.09104
Phvul.007G108200	4.27262	1.5548	0.363898	-1.45839
Phvul.007G128600	3.08898	1.33058	0.430751	-1.21508
Phvul.007G138800	17.7106	7.93469	0.448019	-1.15837
Phvul.007G174100	1.92402	0.393539	0.20454	-2.28955
Phvul.007G192100	19.2703	8.8413	0.458804	-1.12405
Phvul.007G198700	2.79839	1.31251	0.469023	-1.09226
Phvul.007G200600	3.28627	UD	UD	UD
Phvul.007G211800	2.70615	0.541693	0.200171	-2.3207
Phvul.007G212300	5.86003	2.06552	0.352476	-1.5044
Phvul.007G212500				-1.40347
Phvul.007G214800	5.30095	1.95564	0.368923	-1.43861
Phvul.007G225200	19.1288	3.60187	0.188296	-2.40893
Phvul.007G231800	4.84242	0.622978	0.12865	-2.95847
Phvul.007G239800	41.6868	18.3288	0.439679	-1.18548
Phvul.007G254800	3.66729	1.22011	0.332701	-1.5877
Phvul.007G265300	2.17298	0.409404	0.188407	-2.40808
Phvul.007G276700	427.494	166.452	0.389367	-1.3608
Phvul.007G278200	2.9431	1.24123	0.421742	-1.24556
Phvul.008G001200	6.50766	1.82459	0.280376	-1.83456
Phvul.008G002700	1.60236	0.405339	0.252964	-1.983
Phvul.008G013300	2.06082	0.593047	0.287772	-1.797
Phvul.008G021300	66.7227	24.4467	0.366393	-1.44854
Phvul.008G034100	15.3253	5.86643	0.382794	-1.38536
Phvul.008G040500	5.68359	2.64645	0.46563	-1.10274
Phvul.008G042500	1.04095	0.155122	0.14902	-2.74643
Phvul.008G057700	1.93189	0.770923	0.399051	-1.32536
Phvul.008G091400	0.86501	0.240151	0.277628	-1.84878
Phvul.008G096200	1.46569	UD	UD	UD
Phvul.008G104900	28.925	13.7699	0.476055	-1.0708
Phvul.008G112100	4.36053	1.23289	0.282739	-1.82246
Phvul.008G134100	32.0591	12.9919	0.405248	-1.30312
Phvul.008G168500	2.50657	0.945588	0.377244	-1.40643
Phvul.008G170800	5.78703	2.44382	0.422293	-1.24369
Phvul.008G173200	2.7425	0.878649	0.320382	-1.64213
Phvul.008G212300	6.59386	3.24035	0.491419	-1.02497
Phvul.008G219800	10.6996	4.65981	0.435513	-1.19921
Phvul.008G236800	3.24332	1.51033	0.465674	-1.10261
Phvul.008G239500	3.94499	1.4189	0.359671	-1.47525
Phvul.008G241900	13.7512	6.76839	0.492204	-1.02268
Phvul.008G259700	3.32644	0.760903	0.228744	-2.12819
Phvul.008G261200	9.96613	4.30351	0.431814	-1.21152
Phvul.008G266700	3.90908	1.20826	0.309091	-1.69389
Phvul.008G283100	11.925	3.89459	0.32659	-1.61445
Phvul.008G289700	2.10467	0.814697	0.38709	-1.36926
Phvul.009G000300	15.4432	6.20622	0.401874	-1.31518
Phvul.009G017800	7.07975	3.18883	0.450416	-1.15067
Phvul.009G018200	1.92377	0.284316	0.147791	-2.75837
Phvul.009G019400	20.0497	3.42235	0.170693	-2.55052
Phvul.009G026400	7.45683	3.46551	0.464743	-1.1055
Phvul.009G027600	46.8914	6.12974	0.130722	-2.93542
Phvul.009G028400	18.1767	3.32147	0.182732	-2.4522
Phvul.009G062900	23.9703	11.2199	0.468075	-1.09519
Phvul.009G081400	9.62381	3.79964	0.394817	-1.34074
Phvul.009G090224	817.65	173.477	0.212165	-2.23673
Phvul.009G112000	3.51941	1.62908	0.462884	-1.11128
Phvul.009G162700	152.717	64.643	0.423286	-1.24029
Phvul.009G164800	1.37142	0.19156	0.13968	-2.83981
Phvul.009G168000	7.61002	2.84412	0.373734	-1.41992
Phvul.009G175800	6.91657	3.04763	0.440627	-1.18237
Phvul.009G186000	6.28949	2.53548	0.40313	-1.31069
Phvul.009G194100	25.7743	3.60504	0.13987	-2.83785
Phvul.009G201600	1.31258	0.581061	0.442686	-1.17564
Phvul.009G203200	3.50264	0.806009	0.230115	-2.11957
Phvul.009G205200	3.2461	0.464652	0.143142	-2.80448
Phvul.009G229900	30.6952	13.0455	0.425001	-1.23446
Phvul.009G234800	8.15521	3.12789	0.383545	-1.38253
Phvul.009G254100	4.28735	1.69458	0.395251	-1.33916
Phvul.009G257100	2.6625	1.15238	0.432819	-1.20817
Phvul.010G015400	7.3432	1.3471	0.183449	-2.44656
Phvul.010G035850	20.0693	2.38237	0.118707	-3.07452
Phvul.010G073500	9.10501	3.04921	0.334894	-1.57823
Phvul.010G087500	11.3498	2.8963	0.255185	-1.97039
Phvul.010G090300	3.30901	1.6261	0.491416	-1.02498
Phvul.010G099700	4.37696	1.02917	0.235134	-2.08845
Phvul.010G107400	1.16535	0.382487	0.328216	-1.60728
Phvul.010G117200	55.4918	21.759	0.392112	-1.35066
Phvul.010G128000	2.40817	0.969981	0.402788	-1.31191
Phvul.010G129700	801.092	392.281	0.489683	-1.03008
Phvul.010G134900	421.526	112.184	0.266138	-1.90975
Phvul.010G135701	1.44054	0.520542	0.361352	-1.46852
Phvul.010G135900	1.1804	0.278109	0.235606	-2.08555
Phvul.010G140700	53.9953	22.7429	0.421201	-1.24742
Phvul.010G141050	10.3555	4.33869	0.418974	-1.25507
Phvul.010G141200	7.55907	3.48114	0.460525	-1.11865
Phvul.010G146400	7.33267	1.55505	0.212071	-2.23738
Phvul.011G005200	2.37644	0.371585	0.156362	-2.67704
Phvul.011G012801	3.48824	1.17443	0.336683	-1.57053
Phvul.011G029000	2.12913	0.238777	0.112148	-3.15653
Phvul.011G032300	9.02638	2.46013	0.272549	-1.87541
Phvul.011G033800	45.5728	15.0045	0.329242	-1.60278
Phvul.011G040800	10.7979	4.82064	0.446442	-1.16346
Phvul.011G043800	140.426	8.10069	0.0576865	-4.11562
Phvul.011G046700	103.491	46.2735	0.447126	-1.16124
Phvul.011G048600	6.97275	2.71932	0.389992	-1.35848
Phvul.011G048900	2.13222	0.66422	0.311516	-1.68262
Phvul.011G056564	2.22594	0.668664	0.300396	-1.73506
Phvul.011G072200	2.08578	0.731289	0.350607	-1.51207
Phvul.011G074400	11.0635	3.31628	0.29975	-1.73818
Phvul.011G074600	5.7939	1.32376	0.228475	-2.1299
Phvul.011G074700	4.31916	1.86986	0.432922	-1.20782
Phvul.011G076900	9.01584	2.26721	0.25147	-1.99155
Phvul.011G077000	6.81764	1.32533	0.194397	-2.36292
Phvul.011G077100	11.4134	2.81776	0.246882	-2.0181
Phvul.011G077200	9.58537	4.07665	0.425299	-1.23345
Phvul.011G077700	45.2846	14.2121	0.31384	-1.6719
Phvul.011G084300	9.20743	2.21863	0.240961	-2.05313
Phvul.011G097000	161.46	43.7098	0.270716	-1.88515
Phvul.011G104400	3.84322	1.46848	0.382096	-1.38799
Phvul.011G107900	4.43542	1.36926	0.30871	-1.69568
Phvul.011G115215	6.12898	2.01879	0.329384	-1.60215
Phvul.011G115230	10.5649	1.20231	0.113802	-3.13539
Phvul.011G127500	1.44407	0.252537	0.174879	-2.51557
Phvul.011G136600	1.37244	0.58695	0.427669	-1.22543
Phvul.011G139100	1.69656	0.503914	0.297021	-1.75136
Phvul.011G147800	5.88738	2.10313	0.357227	-1.48509
Phvul.011G152400	2.27979	0.867215	0.380392	-1.39444
Phvul.011G157000	4.29188	0.787615	0.183513	-2.44605
Phvul.011G203032	2.17652	0.852034	0.391466	-1.35304
Phvul.L001647	10.2531	3.59394	0.350522	-1.51242
Phvul.L001754	118.406	26.5616	0.224326	-2.15633
Phvul.L006401	4.41615	0.418602	0.0947889	-3.39914
Phvul.L007443	7.98783	2.02669	0.253722	-1.97868
