# Supplementary material for: Phosphate Deficiency Negatively Affects Early Steps of the Symbiosis between Common Bean and Rhizobia
Source: Preprints.org preprint supplement (doi:10.20944/preprints201809.0207.v1), 2018-09-12
Supplement: Supplementary file 7 [file TableS6.xlsx]

## Sheet: Hoja1
Table S5: Genes only regulated under phosphate deficient conditions
Gene ID	FPKM_Mock	FPKM_Rhizobia	Fold Change	Log2Fold-Change
Phvul.002G211800	0	1.97426	ND	ND
Phvul.005G092100	0	1.55024	ND	ND
Phvul.005G114300	0	1.39181	ND	ND
Phvul.006G032966	0	1.1967	ND	ND
Phvul.006G033032	0	2.86239	ND	ND
Phvul.007G086900	0	1.5411	ND	ND
Phvul.007G125400	0	0.828786	ND	ND
Phvul.007G171466	0	0.993868	ND	ND
Phvul.011G202000	0	1.07917	ND	ND
Phvul.L001601	0	1.04334	ND	ND
Phvul.007G113300	0.104531	2.79513	26.7397	4.74092
Phvul.010G124800	1.38258	30.3974	21.986	4.45851
Phvul.007G263950	0.179276	3.79525	21.1699	4.40394
Phvul.011G097200	0.254706	2.56941	10.0877	3.33453
Phvul.002G025300	0.171222	1.56386	9.13352	3.19117
Phvul.006G126400	0.381072	2.98599	7.83576	2.97007
Phvul.003G209101	0.201996	1.52875	7.56822	2.91995
Phvul.002G154600	0.117698	0.88818	7.54626	2.91576
Phvul.004G155500	0.499138	3.66946	7.35159	2.87806
Phvul.001G261500	11.9153	83.6752	7.0225	2.81199
Phvul.001G046200	0.217247	1.37096	6.3106	2.65778
Phvul.001G228500	1.41787	8.36177	5.89742	2.56008
Phvul.007G035500	0.316023	1.72827	5.46881	2.45123
Phvul.009G073900	3.14321	16.0857	5.1176	2.35547
Phvul.002G123900	2.35342	11.4814	4.8786	2.28647
Phvul.007G145600	0.157543	0.766473	4.86517	2.28249
Phvul.008G070800	0.274504	1.27177	4.63297	2.21194
Phvul.001G239900	0.994476	4.14291	4.16592	2.05864
Phvul.006G087800	0.683699	2.73102	3.99448	1.99801
Phvul.011G076500	1.84846	7.28006	3.93845	1.97763
Phvul.005G015900	0.823085	3.17343	3.85553	1.94693
Phvul.011G074100	0.385331	1.45765	3.78285	1.91947
Phvul.002G207300	3.55647	13.3442	3.75209	1.90769
Phvul.009G078300	0.737336	2.75888	3.74169	1.90369
Phvul.008G249500	0.869254	3.22145	3.70599	1.88986
Phvul.009G019900	0.948048	3.47542	3.66587	1.87415
Phvul.001G037100	1.21907	4.43643	3.63919	1.86362
Phvul.003G268200	1.49801	5.3325	3.55972	1.83177
Phvul.002G162500	0.777241	2.71129	3.48835	1.80254
Phvul.004G042600	1.97909	6.76584	3.41866	1.77343
Phvul.006G197500	1.20414	4.09459	3.40043	1.76572
Phvul.009G045601	2.41237	8.14985	3.37836	1.75632
Phvul.007G264900	0.811255	2.69561	3.32277	1.73238
Phvul.004G024800	2.12377	6.60827	3.11158	1.63764
Phvul.009G045700	4.89055	15.2167	3.11145	1.63759
Phvul.011G076400	2.07511	6.1831	2.97965	1.57514
Phvul.011G048700	16.7311	49.736	2.97267	1.57175
Phvul.010G026000	1.69583	4.94906	2.91837	1.54516
Phvul.003G162200	2.44503	7.0337	2.87673	1.52443
Phvul.001G196000	0.92109	2.63414	2.85981	1.51592
Phvul.009G070800	4.90777	13.8044	2.81276	1.49198
Phvul.007G135800	1.9477	5.45407	2.80026	1.48556
Phvul.004G140500	0.335638	0.932082	2.77705	1.47355
Phvul.007G050600	0.990636	2.74088	2.76679	1.46821
Phvul.001G189200	4.48999	12.1934	2.71569	1.44131
Phvul.002G035300	1.86558	5.03432	2.69853	1.43217
Phvul.006G169400	1.4003	3.75379	2.6807	1.42261
Phvul.003G148550	3.8058	10.2006	2.68028	1.42238
Phvul.010G133700	4.43334	11.8623	2.6757	1.41991
Phvul.007G052900	0.732856	1.94872	2.65908	1.41092
Phvul.004G154700	1.34726	3.5754	2.65383	1.40807
Phvul.006G166000	4.0548	10.6649	2.63019	1.39517
Phvul.010G083400	5.68747	14.9434	2.62742	1.39365
Phvul.007G051200	1.29792	3.39742	2.61759	1.38824
Phvul.004G014732	17.6082	46.055	2.61554	1.38711
Phvul.008G144100	3.02147	7.80676	2.58376	1.36947
Phvul.002G304200	17.0337	43.5697	2.55785	1.35493
Phvul.009G109700	3.11995	7.96332	2.55239	1.35184
Phvul.003G267000	1.23686	3.11287	2.51675	1.33157
Phvul.008G057600	26.9073	67.1784	2.49666	1.32
Phvul.007G064800	2.2385	5.58458	2.49479	1.31892
Phvul.007G225200	5.088	12.5839	2.47325	1.3064
Phvul.003G061600	2.0319	5.0231	2.47212	1.30575
Phvul.001G201700	1.69629	4.15478	2.44933	1.29239
Phvul.003G086000	4.82466	11.6016	2.40465	1.26582
Phvul.006G102200	8.93071	21.4094	2.39728	1.2614
Phvul.010G132433	1.31842	3.15876	2.39587	1.26055
Phvul.003G048800	3.33248	7.98009	2.39464	1.25981
Phvul.004G068900	1.8845	4.49389	2.38466	1.25379
Phvul.011G119900	1.76822	4.19128	2.37034	1.24509
Phvul.001G250300	8.10411	18.8537	2.32644	1.21812
Phvul.002G209500	12.4152	28.8254	2.32178	1.21524
Phvul.001G045100	0.850196	1.94224	2.28446	1.19186
Phvul.008G250600	2.4663	5.57701	2.26129	1.17714
Phvul.008G112900	23.4634	52.9813	2.25804	1.17507
Phvul.009G197800	29.8257	67.3434	2.2579	1.17498
Phvul.L002465	3.79313	8.48615	2.23724	1.16172
Phvul.005G100800	11.6831	25.9352	2.21989	1.1505
Phvul.009G092800	1.04805	2.28332	2.17864	1.12343
Phvul.003G091800	40.8574	87.0932	2.13164	1.09196
Phvul.004G123600	12.4954	26.4201	2.11439	1.08024
Phvul.006G053800	1.85022	3.91063	2.1136	1.07971
Phvul.001G249700	95.9071	201.546	2.10147	1.0714
Phvul.006G148000	2.64963	5.53296	2.0882	1.06226
Phvul.010G148000	1.81611	3.76591	2.07361	1.05215
Phvul.004G142000	6.62788	13.6185	2.05473	1.03895
Phvul.008G225500	2.54606	5.21712	2.0491	1.03499
Phvul.007G045400	2.05081	4.19177	2.04396	1.03137
Phvul.004G018900	15.5615	31.7714	2.04167	1.02975
Phvul.008G238500	4.04072	8.20935	2.03166	1.02266
Phvul.003G183100	1.73061	3.50514	2.02538	1.01819
Phvul.007G125500	17.9608	36.117	2.01088	1.00783
Phvul.001G268600	5.42701	10.9129	2.01085	1.00781
Phvul.002G312400	8.62429	17.3112	2.00726	1.00522
Phvul.001G246700	1.67612	3.36379	2.00689	1.00497
Phvul.001G067400	3.69541	1.07106	0.289835	-1.78669
Phvul.001G172400	1.0175	0.279407	0.274601	-1.86459
Phvul.001G198400	1.87184	0.666639	0.356141	-1.48948
Phvul.001G203600	5.58931	1.66224	0.297396	-1.74954
Phvul.001G250700	8.54812	3.44405	0.402901	-1.3115
Phvul.002G052100	5.1846	2.10408	0.405833	-1.30105
Phvul.002G075200	23.4415	10.7434	0.458307	-1.12562
Phvul.002G076500	9.0499	4.48519	0.495607	-1.01273
Phvul.002G195800	41.8902	19.6411	0.468871	-1.09274
Phvul.002G249300	2.73083	0.690135	0.25272	-1.98439
Phvul.002G265400	8.098	3.14506	0.388375	-1.36448
Phvul.002G297500	6.84556	2.53259	0.369961	-1.43456
Phvul.003G091400	10.693	4.35966	0.407712	-1.29438
Phvul.003G107600	15.1925	5.73612	0.377563	-1.40521
Phvul.003G162500	8.12654	1.91416	0.235544	-2.08593
Phvul.003G228600	1.99268	0.8873	0.44528	-1.16722
Phvul.003G245500	24.8694	6.32507	0.254331	-1.97522
Phvul.004G098000	4.82808	1.73732	0.359837	-1.47459
Phvul.004G144900	5.18263	2.22757	0.429815	-1.21821
Phvul.004G158200	3.34759	0.865886	0.25866	-1.95087
Phvul.004G163300	23.7343	10.7091	0.451208	-1.14814
Phvul.005G067900	63.0059	21.7932	0.345891	-1.53161
Phvul.005G071400	1.18657	UD	UD	UD
Phvul.005G153500	1.68819	0.385592	0.228406	-2.13033
Phvul.006G013900	2.32441	0.861138	0.370476	-1.43255
Phvul.006G086100	3.5852	0.802664	0.223883	-2.15919
Phvul.006G199300	21.9034	10.7442	0.490527	-1.02759
Phvul.007G062000	61.0326	28.4427	0.466025	-1.10152
Phvul.007G135400	89.4474	39.3397	0.439808	-1.18505
Phvul.007G153500	30.8645	14.3702	0.46559	-1.10287
Phvul.007G227900	2.56998	0.781998	0.304282	-1.71652
Phvul.007G242100	1.34421	0.269495	0.200486	-2.31843
Phvul.008G011500	3.77261	0.740435	0.196266	-2.34912
Phvul.008G011800	3.94891	0.285146	0.0722088	-3.79168
Phvul.008G160500	4.64883	1.60882	0.34607	-1.53087
Phvul.008G196700	34.1929	0	ND	ND
Phvul.008G262600	0.995066	0.182721	0.183627	-2.44515
Phvul.009G080000	0.944232	0	ND	ND
Phvul.009G105300	1.34152	0.231664	0.172688	-2.53376
Phvul.009G181500	6.59928	2.56113	0.388092	-1.36553
Phvul.009G186700	6.04686	0.724156	0.119757	-3.06181
Phvul.010G098500	4.28696	1.92	0.44787	-1.15885
Phvul.010G111100	30.6992	15.2331	0.496205	-1.01099
Phvul.011G044600	2.87031	1.10914	0.386418	-1.37177
