# Supplementary material for: Phosphate Deficiency Negatively Affects Early Steps of the Symbiosis between Common Bean and Rhizobia
Source: Preprints.org preprint supplement (doi:10.20944/preprints201809.0207.v1), 2018-09-12
Supplement: Supplementary file 8 [file TableS7.xlsx]

## Sheet: Sheet1
Table S7: Expressional behavior of rhizobia-induced genes in both Optimal phosphate- and low phosphate conditions
Gene ID	FPKM_OP_Rhizobia	FPKM_LP_Rhizobia	Fold-Change	Log2 Fold-Change	q_value	Description
Phvul.004G153201	0	1.33763	ND	ND	0.0450452	NA_SP
Phvul.005G088500	0	3.55206	ND	ND	0.0450452	NA_SP
Phvul.005G092100	0	1.56617	ND	ND	0.0154419	NA_SP
Phvul.005G096901	0	2.55773	ND	ND	0.00866087	NA_SP
Phvul.007G200600	0	1.29473	ND	ND	0.00866087	NA_SP
Phvul.006G087800	0.240003	2.75861	11.4941	3.52281	0.03	F-box domain (F-box) // Phloem protein 2 (PP2)
Phvul.003G199000	0.907585	8.31128	9.15758	3.19496	0.00866087	PTHR11558:SF28 - SPERMIDINE/SPERMINE SYNTHASE // SUBFAMILY NOT NAMED
Phvul.001G228500	0.938755	8.32695	8.87021	3.14897	0.00866087	U-BOX DOMAIN-CONTAINING PROTEIN 54-RELATED
Phvul.011G119700	0.441692	3.89067	8.80856	3.13891	0.00866087	Wax ester synthase-like Acyl-CoA acyltransferase domain (WES_acyltransf) // Protein of unknown
Phvul.002G272600	0.406066	3.56284	8.77404	3.13324	0.00866087	NA_SP
Phvul.001G031400	1.08633	7.05991	6.49886	2.70019	0.00866087	PTHR33088:SF9 - HYDROXYPROLINE-RICH GLYCOPROTEIN FAMILY PROTEIN
Phvul.007G173500	0.825621	5.1791	6.27298	2.64915	0.0252152	PTHR33044:SF23 - BIFUNCTIONAL INHIBITOR/LIPID-TRANSFER PROTEIN/SEED STORAGE 2S ALBUMIN SUPERFAMILY
Phvul.008G001200	1.80123	10.7391	5.96209	2.57581	0.00866087	PTHR10791:SF34 - BIDIRECTIONAL SUGAR TRANSPORTER SWEET15
Phvul.009G205200	0.458319	2.64623	5.77377	2.52952	0.00866087	PTHR13301:SF63 - CELLULOSE SYNTHASE A CATALYTIC SUBUNIT 4 [UDP-FORMING]
Phvul.004G088400	0.342329	1.88729	5.51309	2.46287	0.0417173	Alliin lyase / L-cysteine sulfoxide lyase
Phvul.009G045601	1.59516	8.12159	5.0914	2.34806	0.0210423	NA_SP
Phvul.007G046400	0.333434	1.62029	4.8594	2.28077	0.0345434	PTHR11119:SF51 - NUCLEOBASE-ASCORBATE TRANSPORTER 4
Phvul.002G240200	0.659213	3.11377	4.72347	2.23984	0.00866087	PTHR13301:SF31 - CELLULOSE SYNTHASE A CATALYTIC SUBUNIT 8 [UDP-FORMING]
Phvul.002G211900	2.67902	12.2217	4.562	2.18966	0.00866087	NA_SP
Phvul.006G203000	6.4656	28.7	4.43888	2.15019	0.00866087	NA_SP
Phvul.004G119300	0.500144	2.16717	4.33309	2.1154	0.0387333	KOG0156 - Cytochrome P450 CYP2 subfamily
Phvul.006G166000	2.4799	10.7409	4.33118	2.11476	0.00866087	NA_SP
Phvul.002G207300	3.07627	13.3037	4.32462	2.11257	0.00866087	PTHR24078 - DNAJ HOMOLOG SUBFAMILY C MEMBER
Phvul.008G112100	1.21776	5.1247	4.2083	2.07324	0.00866087	PTHR11709:SF9 - LACCASE-7-RELATED
Phvul.003G010600	0.339732	1.37045	4.03391	2.01218	0.0345434	PTHR24096:SF134 - LONG CHAIN ACYL-COA SYNTHETASE 2
Phvul.006G194900	2.62423	10.4947	3.99915	1.99969	0.00866087	K03809 - NAD(P)H dehydrogenase (quinone) (wrbA)
Phvul.002G082100	0.649495	2.55665	3.93637	1.97687	0.0417173	PTHR31388:SF9 - PEROXIDASE 11
Phvul.005G045800	2.46325	9.23873	3.75063	1.90713	0.00866087	PTHR13683:SF298 - ASPARTIC PROTEINASE CDR1-RELATED
Phvul.002G266800	0.718516	2.68116	3.73152	1.89977	0.0210423	PTHR11132//PTHR11132:SF73 - SOLUTE CARRIER FAMILY 35 // SUBFAMILY NOT NAMED
Phvul.007G265300	0.404333	1.47117	3.63851	1.86335	0.0210423	PTHR19241//PTHR19241:SF286 - ATP-BINDING CASSETTE TRANSPORTER // SUBFAMILY NOT NAMED
Phvul.007G225200	3.57116	12.6534	3.54322	1.82506	0.00866087	PTHR23241:SF11 - LATE EMBRYOGENESIS ABUNDANT PROTEIN (ATECP63)-RELATED
Phvul.009G203200	0.794498	2.75952	3.47329	1.7963	0.0481159	PF04833 - COBRA-like protein (COBRA)
Phvul.005G130900	1.58574	5.41394	3.41414	1.77152	0.00866087	3.2.1.151 - Xyloglucan-specific endo-beta-1,4-glucanase / Xyloglucanendohydrolase
Phvul.005G015900	0.949551	3.19064	3.36016	1.74853	0.0417173	PF00892 - EamA-like transporter family (EamA)
Phvul.L001647	3.55497	11.4604	3.22377	1.68875	0.00866087	NA_SP
Phvul.011G018000	15.4653	48.628	3.14433	1.65275	0.00866087	PTHR11695//PTHR11695:SF538 - ALCOHOL DEHYDROGENASE RELATED // SUBFAMILY NOT NAMED
Phvul.009G194100	3.56817	10.9908	3.08023	1.62304	0.00866087	K03098 - apolipoprotein D and lipocalin family protein (APOD)
Phvul.010G087500	2.86934	8.63128	3.00811	1.58886	0.00866087	K05282 - gibberellin 20-oxidase
Phvul.011G074400	3.27615	9.68542	2.95634	1.56381	0.00866087	PTHR32077:SF7 - FASCICLIN-LIKE ARABINOGALACTAN PROTEIN 11
Phvul.005G042200	6.28903	18.5514	2.9498	1.56062	0.00866087	NA_SP
Phvul.001G239900	1.41723	4.16335	2.93767	1.55467	0.00866087	PTHR22298//PTHR22298:SF32 - ENDO-1,4-BETA-GLUCANASE // SUBFAMILY NOT NAMED
Phvul.009G027600	6.05115	17.7526	2.93376	1.55275	0.00866087	PTHR22814:SF84 - HEAVY-METAL-ASSOCIATED DOMAIN-CONTAINING PROTEIN
Phvul.001G196000	0.907644	2.62585	2.89304	1.53258	0.0345434	PTHR22849:SF38 - E3 UBIQUITIN-PROTEIN LIGASE PUB22-RELATED
Phvul.007G239800	18.175	51.9573	2.85872	1.51537	0.00866087	PF00139 - Legume lectin domain (Lectin_legB)
Phvul.003G287500	1.49895	4.16208	2.77666	1.47336	0.03	PTHR11695:SF497 - CINNAMYL ALCOHOL DEHYDROGENASE 6-RELATED
Phvul.005G002600	1.50234	4.12868	2.74817	1.45847	0.00866087	PTHR12526:SF358 - SUCROSE-PHOSPHATE SYNTHASE 4-RELATED
Phvul.009G028400	3.28265	9.00751	2.74398	1.45627	0.00866087	PTHR11814:SF61 - SULFATE TRANSPORTER 2.1-RELATED
Phvul.007G128600	1.31702	3.58059	2.71871	1.44291	0.0417173	PF00892 - EamA-like transporter family (EamA)
Phvul.009G226600	7.15711	19.1514	2.67586	1.42	0.00866087	PTHR10426//PTHR10426:SF35 - STRICTOSIDINE SYNTHASE-RELATED // SUBFAMILY NOT NAMED
Phvul.011G097000	43.0591	113.882	2.64478	1.40315	0.00866087	1.1.1.198 - (+)-borneol dehydrogenase
Phvul.002G209400	8.06917	21.3119	2.64115	1.40117	0.00866087	PF00407 - Pathogenesis-related protein Bet v I family
Phvul.010G015400	1.33604	3.52496	2.63836	1.39965	0.00866087	1.2.1.41//2.7.2.11 - Glutamate-5-semialdehyde dehydrogenase / Glutamyl-gamma-semialdehyde dehydrogenase // Glutamate 5-kinase / Gamma-glutamyl kinase
Phvul.004G006200	4.83724	12.6777	2.62085	1.39004	0.03	PTHR12396:SF10 - METHYL-CPG-BINDING DOMAIN-CONTAINING PROTEIN 1-RELATED
Phvul.004G146600	2.62665	6.71692	2.55722	1.35458	0.00866087	PTHR11200//PTHR11200:SF144 - INOSITOL 5-PHOSPHATASE
Phvul.008G044701	2.13441	5.43175	2.54485	1.34758	0.00866087	Non-specific serine/threonine protein kinase / Threonine-specific protein kinase
Phvul.011G077700	14.0308	35.4219	2.52458	1.33604	0.00866087	PTHR32077:SF7 - FASCICLIN-LIKE ARABINOGALACTAN PROTEIN 11
Phvul.003G164000	8.47613	21.3155	2.51477	1.33042	0.00866087	PTHR11654:SF85 - PROTEIN NRT1/ PTR FAMILY 6.2
Phvul.007G064100	2.83304	7.04382	2.48631	1.31401	0.00866087	PTHR10795:SF322 - SUBTILISIN SERINE PROTEASE-RELATED
Phvul.010G134900	111.193	276.451	2.48623	1.31396	0.00866087	1.13.11.12//1.13.11.58 - Linoleate 13S-lipoxygenase / Lipoxidase // Linoleate 9S-lipoxygenase / Linoleate 9-lipoxygenase
Phvul.003G225100	2.87243	6.96944	2.42632	1.27877	0.0154419	Glutamate dehydrogenase (NAD(P)(+)) / Glutamic dehydrogenase
Phvul.010G144200	9.13414	21.5751	2.36203	1.24003	0.00866087	Acid phosphatase / Phosphomonoesterase
Phvul.006G022300	2.48849	5.82519	2.34085	1.22704	0.0154419	PF03188 - Eukaryotic cytochrome b561
Phvul.003G096700	66.4978	152.801	2.29784	1.20028	0.00866087	PTHR33509:SF5 - LATE EMBRYOGENESIS ABUNDANT 3 (LEA3) FAMILY PROTEIN
Phvul.008G109001	11.6774	26.7741	2.29281	1.19712	0.00866087	ISOAMYL ACETATE-HYDROLYZING ESTERASE 1 // SUBFAMILY NOT NAMED
Phvul.011G046250	264.662	601.695	2.27345	1.18488	0.0154419	Protein of unknown function (DUF2775) (DUF2775)
Phvul.003G212900	2.39865	5.39743	2.25019	1.17005	0.0417173	NA_SP
Phvul.002G199800	2.8398	6.32588	2.22758	1.15548	0.0154419	1.3.3.8 - Tetrahydroberberine oxidase / THB oxidase
Phvul.005G048900	3.27286	7.24133	2.21254	1.1457	0.0417173	PTHR11040//PTHR11040:SF59 - ZINC/IRON TRANSPORTER // SUBFAMILY NOT NAMED
Phvul.007G040900	6.78107	14.9039	2.19787	1.13611	0.00866087	PF04450 - Peptidase of plants and bacteria (BSP)
Phvul.010G012900	12.7868	27.6247	2.16041	1.1113	0.00866087	Isoflavone 2'-hydroxylase / Isoflavone 2'-monooxygenase
Phvul.001G261500	39.3274	84.213	2.14133	1.09851	0.0154419	Flavonoid 3'-monooxygenase / Flavonoid 3'-hydroxylase
Phvul.011G055800	12.8023	27.3351	2.13517	1.09435	0.00866087	K01188 - beta-glucosidase (E3.2.1.21)
Phvul.011G183000	14.4245	30.747	2.13158	1.09192	0.00866087	PF00407 - Pathogenesis-related protein Bet v I family (Bet_v_1)
Phvul.005G151700	12.5833	26.5468	2.10969	1.07703	0.00866087	K01188 - beta-glucosidase (E3.2.1.21)
Phvul.001G178000	7.44575	15.4009	2.06841	1.04852	0.0252152	2.7.1.20 - Adenosine kinase
Phvul.007G276700	165.131	333.746	2.0211	1.01514	0.00866087	PF00045 - Hemopexin (Hemopexin)
Phvul.007G063900	4.06594	8.19451	2.0154	1.01107	0.0417173	PTHR10030:SF25 - ALPHA-L-FUCOSIDASE-RELATED
Phvul.008G250300	121.738	60.6334	0.498065	-1.0056	0.00866087	NA_SP
Phvul.007G076700	25.5093	12.6514	0.495952	-1.01173	0.00866087	PTHR31269:SF2 - S-TYPE ANION CHANNEL SLAH2-RELATED
Phvul.006G207600	26.2989	13.0278	0.495374	-1.01341	0.0252152	PTHR24078 - DNAJ HOMOLOG SUBFAMILY C MEMBER
Phvul.001G056300	16.3509	8.06911	0.493496	-1.01889	0.00866087	PTHR31970:SF3 - MOLYBDATE TRANSPORTER 1
Phvul.001G201300	149.928	73.5913	0.490844	-1.02667	0.00866087	1.11.1.7 - Peroxidase / Lactoperoxidase
Phvul.008G174900	5.71968	2.80502	0.490416	-1.02792	0.0387333	PF00069//PF13947 - Protein kinase domain (Pkinase) // Wall-associated receptor kinase galacturonan-binding (GUB_WAK_bind)
Phvul.002G181200	37.6652	18.3811	0.488013	-1.03501	0.00866087	PTHR11200:SF63 - DNASE I-LIKE SUPERFAMILY PROTEIN
Phvul.011G020400	156.695	76.2092	0.486354	-1.03992	0.00866087	PTHR12231//PTHR12231:SF108 - CTX-RELATED TYPE I TRANSMEMBRANE PROTEIN // SUBFAMILY NOT NAMED
Phvul.005G132200	180.806	87.8454	0.485854	-1.04141	0.0481159	K02575 - MFS transporter, NNP family, nitrate/nitrite transporter (NRT, narK, nrtP, nasA)
Phvul.009G127900	30.5185	14.8145	0.485427	-1.04267	0.00866087	PTHR11706//PTHR11706:SF38 - MANGANESE TRANSPORTER // SUBFAMILY NOT NAMED
Phvul.003G264600	7.89797	3.81183	0.482634	-1.051	0.00866087	PTHR24423:SF436 - HISTIDINE KINASE 1
Phvul.005G162100	4.52434	2.15304	0.475879	-1.07133	0.0417173	F00560//PF07714//PF12819 - Leucine Rich Repeat (LRR_1) // Protein tyrosine kinase (Pkinase_Tyr) // Carbohydrate-binding protein of the ER (Malectin_like)
Phvul.001G071500	5.8199	2.75054	0.472609	-1.08128	0.0252152	PTHR22950:SF205 - AMINO ACID PERMEASE 3-RELATED
Phvul.011G074900	4.65657	2.17168	0.466369	-1.10046	0.0252152	PF02140//PF02449 - Galactose binding lectin domain (Gal_Lectin) // Beta-galactosidase (Glyco_hydro_42)
Phvul.006G086200	11.5934	5.33234	0.459946	-1.12046	0.00866087	NA_SP
Phvul.002G140800	12.8228	5.85564	0.456658	-1.13081	0.0154419	K02698 - photosystem I subunit X (psaK)
Phvul.005G111800	6.0951	2.75573	0.452122	-1.14521	0.0154419	PF03514 - GRAS domain family (GRAS)
Phvul.009G031300	3.38929	1.52159	0.448941	-1.15541	0.0345434	K12118 - cryptochrome 1 (CRY1)
Phvul.003G134600	49.4588	21.9318	0.443436	-1.17321	0.00866087	PTHR31388:SF6 - PEROXIDASE 59
Phvul.002G177000	10.2996	4.55424	0.442176	-1.17731	0.00866087	2.3.1.150 - Salutaridinol 7-O-acetyltransferase
Phvul.003G229000	48.237	21.2733	0.441016	-1.1811	0.00866087	PTHR11654:SF121 - PROTEIN NRT1/ PTR FAMILY 7.3
Phvul.011G201000	8.02387	3.53399	0.440435	-1.183	0.00866087	PTHR23155//PTHR23155:SF414 - LEUCINE-RICH REPEAT-CONTAINING PROTEIN // SUBFAMILY NOT NAMED
Phvul.002G293200	8.70116	3.78694	0.435222	-1.20017	0.0481159	PF03106 - WRKY DNA -binding domain (WRKY)
Phvul.003G204032	4.80966	2.07453	0.431326	-1.21315	0.0210423	PTHR10638//PTHR10638:SF34 - COPPER AMINE OXIDASE
Phvul.006G083600	16.7101	7.13618	0.427058	-1.22749	0.0210423	PTHR31852:SF1 - LATE EMBRYOGENESIS ABUNDANT (LEA) HYDROXYPROLINE-RICH GLYCOPROTEIN-RELATED
Phvul.010G002500	50.63	21.2853	0.420409	-1.25014	0.00866087	NA_SP
Phvul.008G073700	4.15369	1.74345	0.419735	-1.25245	0.0252152	PTHR10795:SF320 - SUBTILASE FAMILY PROTEIN-RELATED
Phvul.009G109100	7.07712	2.96187	0.418513	-1.25665	0.00866087	K11159 - carotenoid cleavage dioxygenase (K11159)
Phvul.004G115800	19.5531	8.1588	0.417264	-1.26097	0.00866087	PTHR33044:SF21 - PROTEIN YLS3
Phvul.002G212450	6.69447	2.71454	0.40549	-1.30226	0.0481159	PTHR11945:SF179 - MADS-BOX PROTEIN SVP
Phvul.009G256900	334.728	130.972	0.391279	-1.35373	0.00866087	NA_SP
Phvul.002G134700	6.50488	2.47257	0.38011	-1.39551	0.0154419	PTHR21493//PTHR21493:SF2 - CGI-141-RELATED/LIPASE CONTAINING PROTEIN // SUBFAMILY NOT NAMED
Phvul.006G150600	8.6195	3.21534	0.373031	-1.42263	0.0210423	PTHR11527:SF97 - 15.4 KDA CLASS V HEAT SHOCK PROTEIN
Phvul.L005901	25.6365	9.50308	0.370686	-1.43173	0.00866087	PTHR31086:SF4 - ALUMINUM-ACTIVATED MALATE TRANSPORTER 10
Phvul.010G014300	8.50814	3.12268	0.367023	-1.44606	0.00866087	PTHR31623:SF15 - ACETYL-COA:BENZYLALCOHOL ACETYLTRANFERASE-LIKE PROTEIN-RELATED
Phvul.002G099700	69.1821	24.8759	0.359571	-1.47565	0.00866087	PTHR11040:SF48 - ZINC TRANSPORTER 10-RELATED
Phvul.002G135900	17.1586	6.14561	0.358165	-1.4813	0.00866087	PTHR21493//PTHR21493:SF2 - CGI-141-RELATED/LIPASE CONTAINING PROTEIN // SUBFAMILY NOT NAMED
Phvul.011G122800	9.60064	3.388	0.352893	-1.5027	0.00866087	K08472 - mlo protein (MLO)
Phvul.006G109000	153.686	53.626	0.348932	-1.51898	0.00866087	PTHR11177//PTHR11177:SF170 - CHITINASE // SUBFAMILY NOT NAMED
Phvul.008G178100	9.53744	3.31983	0.348084	-1.52249	0.00866087	PTHR10209//PTHR10209:SF167 - OXIDOREDUCTASE, 2OG-FE II OXYGENASE FAMILY PROTEIN // SUBFAMILY NOT NAMED
Phvul.011G046400	78.992	27.285	0.345415	-1.5336	0.00866087	PF10950 - Protein of unknown function (DUF2775) (DUF2775)
Phvul.007G100800	48.1518	16.4893	0.342444	-1.54606	0.00866087	NA_SP
Phvul.008G244400	15.0881	5.01173	0.332164	-1.59003	0.00866087	PTHR27003:SF36 - LEUCINE-RICH REPEAT PROTEIN KINASE-LIKE PROTEIN
Phvul.002G100001	7.1082	2.33434	0.328401	-1.60647	0.00866087	PTHR11040:SF48 - ZINC TRANSPORTER 10-RELATED
Phvul.009G094600	3.46907	0.985163	0.283985	-1.81611	0.0252152	PF03140 - Plant protein of unknown function (DUF247)
Phvul.001G246300	12.2966	3.43117	0.279034	-1.84149	0.00866087	PTHR31213:SF9 - ABSCISIC ACID RECEPTOR PYL5
Phvul.001G130900	4.8624	1.14409	0.235293	-2.08746	0.00866087	PTHR19241//PTHR19241:SF247 - ATP-BINDING CASSETTE TRANSPORTER // SUBFAMILY NOT NAMED
Phvul.003G065600	3.628	0.767689	0.211601	-2.24058	0.0210423	PF10536 - Plant mobile domain (PMD)
Phvul.001G050300	4.0808	0.789345	0.193429	-2.37012	0.0387333	PTHR31731:SF19 - BIFUNCTIONAL INHIBITOR/LIPID-TRANSFER PROTEIN/SEED STORAGE 2S ALBUMIN SUPERFAMILY
Phvul.003G058000	2.17139	0.418342	0.192661	-2.37586	0.0345434	PTHR31828:SF1 - PHOSPHOLIPASE A1-IIALPHA-RELATED
Phvul.001G226900	36.6835	6.99688	0.190736	-2.39035	0.00866087	PF13947 - Wall-associated receptor kinase galacturonan-binding (GUB_WAK_bind)
Phvul.003G057900	47.6334	7.40902	0.155543	-2.68462	0.00866087	NA_SP
Phvul.011G083500	42.7829	2.24326	0.0524336	-4.25337	0.00866087	K02575 - MFS transporter, NNP family, nitrate/nitrite transporter (NRT, narK, nrtP, nasA)
Phvul.002G181000	1.3222	ND	ND	ND	0.0210423	NA_SP
